# Supplementary material for: Predictive value of relative fat mass algorithm for incident hypertension: a 6-year prospective study in Chinese population
Source: PubMed Central journal article supplement — BMJ Open. 2020 Oct 16;10(10):e038420. doi: 10.1136/bmjopen-2020-038420 (PMC7569915; doi:10.1136/bmjopen-2020-038420), 2020-10-16
Supplement: bmjopen-2020-038420.draft_revisions.pdf [file bmjopen-2020-038420.draft_revisions.pdf]

# BMJ Open

BMJ Open is committed to open peer review. As part of this commitment we make the peer review history of every article we publish publicly available.

When an article is published we post the peer reviewers' comments and the authors' responses online. We also post the versions of the paper that were used during peer review. These are the versions that the peer review comments apply to.

The versions of the paper that follow are the versions that were submitted during the peer review process. They are not the versions of record or the final published versions. They should not be cited or distributed as the published version of this manuscript.

BMJ Open is an open access journal and the full, final, typeset and author-corrected version of record of the manuscript is available on our site with no access controls, subscription charges or pay-per-view fees (<http://bmjopen.bmj.com>).

If you have any questions on BMJ Open's open peer review process please email [info.bmjopen@bmj.com](mailto:info.bmjopen@bmj.com)

# BMJ Open

## Predictive Value of Relative Fat Mass Algorithm for Incident Hypertension: a 6-year Prospective Study in a Chinese Population

|                               |                                                                                                                                                                                                                                                                                                                                                                                                                                                                                                                                                                          |
|-------------------------------|--------------------------------------------------------------------------------------------------------------------------------------------------------------------------------------------------------------------------------------------------------------------------------------------------------------------------------------------------------------------------------------------------------------------------------------------------------------------------------------------------------------------------------------------------------------------------|
| Journal:                      | <i>BMJ Open</i>                                                                                                                                                                                                                                                                                                                                                                                                                                                                                                                                                          |
| Manuscript ID                 | bmjopen-2020-038420                                                                                                                                                                                                                                                                                                                                                                                                                                                                                                                                                      |
| Article Type:                 | Original research                                                                                                                                                                                                                                                                                                                                                                                                                                                                                                                                                        |
| Date Submitted by the Author: | 11-Mar-2020                                                                                                                                                                                                                                                                                                                                                                                                                                                                                                                                                              |
| Complete List of Authors:     | Yu, Peng; Tongji Hospital of Tongji Medical College of Huazhong University of Science and Technology, Department of Internal Medicine<br>huang, teng; Tongji Hospital of Tongji Medical College of Huazhong University of Science and Technology, Department of Internal Medicine<br>hu, senlin; Tongji Hospital of Tongji Medical College of Huazhong University of Science and Technology, Department of Internal Medicine<br>Yu, Xuefeng; Tongji Hospital of Tongji Medical College of Huazhong University of Science and Technology, Department of Internal Medicine |
| Keywords:                     | Hypertension < CARDIOLOGY, Diabetes & endocrinology < INTERNAL MEDICINE, PUBLIC HEALTH, Nutrition < TROPICAL MEDICINE, Epidemiology < INFECTIOUS DISEASES                                                                                                                                                                                                                                                                                                                                                                                                                |
|                               |                                                                                                                                                                                                                                                                                                                                                                                                                                                                                                                                                                          |

SCHOLARONE™  
Manuscripts

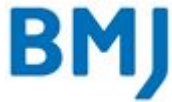

I, the Submitting Author has the right to grant and does grant on behalf of all authors of the Work (as defined in the below author licence), an exclusive licence and/or a non-exclusive licence for contributions from authors who are: i) UK Crown employees; ii) where BMJ has agreed a CC-BY licence shall apply, and/or iii) in accordance with the terms applicable for US Federal Government officers or employees acting as part of their official duties; on a worldwide, perpetual, irrevocable, royalty-free basis to BMJ Publishing Group Ltd ("BMJ") its licensees and where the relevant Journal is co-owned by BMJ to the co-owners of the Journal, to publish the Work in this journal and any other BMJ products and to exploit all rights, as set out in our [licence](#).

The Submitting Author accepts and understands that any supply made under these terms is made by BMJ to the Submitting Author unless you are acting as an employee on behalf of your employer or a postgraduate student of an affiliated institution which is paying any applicable article publishing charge ("APC") for Open Access articles. Where the Submitting Author wishes to make the Work available on an Open Access basis (and intends to pay the relevant APC), the terms of reuse of such Open Access shall be governed by a Creative Commons licence – details of these licences and which [Creative Commons](#) licence will apply to this Work are set out in our licence referred to above.

Other than as permitted in any relevant BMJ Author's Self Archiving Policies, I confirm this Work has not been accepted for publication elsewhere, is not being considered for publication elsewhere and does not duplicate material already published. I confirm all authors consent to publication of this Work and authorise the granting of this licence.

1  
2  
3  
4  
5  
6  
7  
8  
9

## Predictive Value of Relative Fat Mass Algorithm for Incident Hypertension: a 6-year Prospective Study in a Chinese Population

10 Peng Yu, Teng Huang, Senlin Hu, Xuefeng Yu  
11 Department of Internal Medicine, Tongji Hospital, Huazhong University of Science and  
12 Technology, Wuhan, Hubei 430030, P.R. China  
13

14  
15  
16 **Corresponding author:**

17 Xuefeng Yu, MD, PhD

18 Department of Internal Medicine

19 Tongji Hospital, Tongji Medical College

20 Huazhong University of Science & Technology

21 No.1095, Jiefang Road, Wuhan 430030, China

22  
23  
24  
25  
26  
27  
28  
29  
30  
31  
32  
33  
34  
35  
36  
37  
38  
39  
40  
41  
42  
43  
44  
45  
46  
47  
48  
49  
50  
51  
52  
53  
54  
55  
56  
57  
58  
59  
60

26 Tel and Fax: +8602783663331

27 Email: xfyu188@163.com

## Abstract

**Objectives** Individuals with obesity especially excessive visceral adiposity have high risk for incident hypertension. Recently, a new algorithm named relative fat mass (RFM) was introduced to define obesity. Our aim was to investigate the whether it can predict hypertension in Chinese population, and to compare its predictive power with traditional indices such as body mass index (BMI), waist circumference (WC), waist-to-height ratio (WHtR).

**Design** A 6-year prospective study.

**Setting** 9 provinces (Hei Long Jiang, Liao Ning, Jiang Su, Shan Dong, He Nan, Hu Bei, Hu Nan, Guang Xi, and Gui Zhou) in China.

**Participants** Those without hypertension in 2009 survey and respond in 2015 survey.

**Intervention** Logistic regression and sensitive analysis were performed to investigate the association between RFM and incident hypertension. Receiver operating characteristic (ROC) analysis was performed to compare the predictive ability of these indices and define their optimal cut-off value.

**Main outcome measures** Incident hypertension in 2015.

**Results** The prevalence of incident hypertension in 2015 based on RFM quartiles were 14.9%, 21.0%, 26.9% and 35.0% respectively (p for trend < 0.001). In overall population, the Odds ratio (OR) for the highest quartile compared to the lowest quartile for RFM was 2.062(1.594-2.668) in the fully adjusted model. In ROC analysis, RFM and WHtR had the highest AUC value in both sexes, but did not show statistical significance when compared to AUC value of BMI in male and AUC value of WC in female.

**Conclusions** RFM can be a powerful indicator for predicting incident hypertension in Chinese population, but it does not show superiority over BMI and WC in predictive power.

### Strengths and limitations of this study

- Our study was the first study to reveal whether the newly invented RFM algorithm can independently predict incident hypertension and compare it predicting power with traditional obesity-related indices.

- We used a nationally representative sample and a prospective design to investigate the predictive power of RFM for incident hypertension.
- Potential bias may exist due to the exclusion of individuals whose data were incomplete.
- We can't validate and evaluate the performance of the RFM algorithm to estimate body fat percentage in our study population as the body composition estimates are lacking, which hinders the further interpretation of our results.

## Introduction

During the last three decades, hypertension has been the leading cause for all-cause deaths worldwide <sup>1</sup>. An international survey indicated that the incident rate of hypertension was 40.8% in their multinational study population <sup>2</sup>. In China, 23.2% of adult population had hypertension and another 41.3% were in a pre-hypertension state, however, only 46.9% were aware of the diagnosis and minority were effectively controlled in those who were diagnosed <sup>3</sup>. Statistics present the grim reality, there is no doubt blood pressure-related morbidity and mortality will exert a huge burden. Thus, despite improvement in hypertension diagnosis and treatment, implementing effective measures to identify people at risk and prevent the incident of hypertension is extremely important.

Obesity is a significant risk factor for hypertension, various studies in different ethnic group has showed this association <sup>4</sup>. For example, the Framingham heart indicated that 34% of hypertension in men and 62% of hypertension in women can be ascribed to overweight and obesity <sup>5</sup>. On the other hand, weight loss intervention can significantly lower the blood pressure and serve as an effective method for the primary prevention of hypertension <sup>6 7</sup>. Currently, when considering the deleterious effect of obesity, excessive intra-abdominal or visceral adipose tissue not subcutaneous fat were regarded as the main cause for hypertension and other cardio-metabolic abnormalities <sup>8-11</sup>. Thus, a proper assessment of excessive adiposity especially central adiposity can effectively identify those at high risk for hypertension.

BMI and WC has been recommended to define obesity by several guidelines. However, BMI does not distinguish fat mass from lean mass and does not reflect fat distribution <sup>12 13</sup>, WC can be a proxy for abdominal fat distribution but owing to its close relationship to body size, it may overestimate the risk in tall individuals and underestimate the risk

1  
2  
3 in short individuals <sup>14</sup>. In 2018, a new algorithm named RFM had been introduced by  
4 Woolcott et al. to estimate whole-body fat percentage among adult individuals, they  
5 proved it was high correlated with abdominal obesity and can better predict whole-body  
6 fat percentage than BMI, which was validated by dual energy X-ray absorptiometry <sup>15</sup>.  
7  
8 Moreover, the main component of RFM equation is height to waist ratio, the converse  
9 form of WHtR; as WHtR had been proved to be better than BMI and WC as predictor  
10 for cardiometabolic risk in the Asian population <sup>16</sup>, RFM also show great potential. In  
11 our study, we performed a 6-year prospective study by using data from the China Health  
12 and Nutrition Survey, attempting to investigate whether RFM could be a better  
13 anthropometric index for hypertension risk prediction in Chinese population and  
14 contribute to the prevention of hypertension.  
15  
16  
17  
18  
19  
20  
21  
22  
23

## 24 **Method**

### 25 **Study subjects**

26 The China Health and Nutrition Survey (CHNS) is an ongoing open cohort aiming at  
27 examining the health and nutritional condition and its influencing factors of the  
28 participants. To date, ten rounds of survey (1989, 1991, 1993, 1997, 2000, 2004, 2006,  
29 2009, 2011, 2015) have been conducted. It was co-launched by Carolina Population  
30 Center at the University of North Carolina at Chapel Hill and the National Institute for  
31 Nutrition and Health at the Chinese Center for Disease Control and Prevention. All  
32 participants signed an informed consent form during the survey.  
33  
34  
35  
36  
37  
38

39 In this study, we conducted a prospective study among people aged more than 18 years  
40 by using the data form the 2009 and 2015 CHNS survey. Subjects who participated in  
41 both the 2009 and 2015 survey were enrolled in this study, those who didn't have  
42 hypertension in 2009 were set as baseline sample, and the presence of incident  
43 hypertension in 2015 was defined as the outcome. First, we excluded subjects aged less  
44 than 18 or pregnancy, and those whose medication history for hypertension and results  
45 of blood pressure measurement were both unavailable. Then, subjects lack  
46 anthropometric measurement data or serum biomarker data were excluded, and those  
47 who have missing data about smoking, drinking and outcome were also excluded. Last,  
48 those who had history of myocardial infarction or stroke, moderate to severe chronic  
49 kidney disease ( $eGFR < 60 \text{ mL/min/1.73 m}^2$ ), severe hepatic dysfunction ( $ALT \geq 120$   
50 IU/L) were excluded. Finally, 3382 participants were included in our study (Fig. 1).  
51  
52  
53  
54  
55  
56  
57  
58  
59  
60

## Data Collection

Characteristics of the participants including general personal characteristics, smoking status, alcohol consumption, medical history were obtained by using face to face interview. Each individual's Height and weight were measured by the investigators according to the standard of protocol, and BMI was calculated as weight in kilograms divided by the square of height in meters. When measure waist circumference, the tape was applied horizontally midway between the lower rib margin and the iliac crest. Hip circumference was measured at widest part of the protrusion. WHtR was waist circumference in centimeters divided by height in centimeters. RFM was calculated by using the established formula<sup>15</sup>:

$$RFM(male) = 64 - (20 \times (\frac{height(m)}{WC(m)}))$$

$$RFM(female) = 76 - (20 \times (\frac{height(m)}{WC(m)}))$$

Blood pressure was determined in duplicate to improve accuracy, and the average of the values was reported as the final results. For blood collection, participants were asked to fast for 6 to 8 hours. Blood were collected in EDTA-3K anticoagulant tube, then centrifugation at 3000g for 15 min to separate plasma from blood cells. Plasma samples were stored in cryovial at  $-70^{\circ}\text{C}$  condition and whole blood samples were stored at  $2-8^{\circ}\text{C}$  condition. Whole blood was used for testing of glycated hemoglobin HbA1c by chromatography. Plasma were tested for alanine aminotransferease (ALT), triglycerides (TG), total cholesterol (TC), high density lipoprotein cholesterol (HDL-C), low density lipoprotein cholesterol (LDL-C), uric acid, creatinine (Cr), insulin by using automated biochemistry analyzer. ALT was tested by high-performance liquid chromatography method. HDL-C, LDL-C were determined by enzymatic method. TG were determined by CHOD-PAP method and TC were determined by GPO-PAP method. Uric acid was determined by enzymatic colorimetric method. Glucose was determined by GOD-PAP method. Insulin was determined by Radioimmunity method. Estimate glomerular filtration rate (eGFR) was calculated by using the CKD-EPI equation<sup>17</sup>.

## Definitions

Hypertension was defined as systolic blood pressure (SBP)  $\geq 140$  mmHg or diastolic blood pressure (DBP)  $\geq 90$  mmHg, or subjects reported been diagnosed or treated with



1  
2  
3 anti-hypertensive drugs. Diabetes was defined as previously diagnosed with diabetes or  
4 fasting blood glucose  $\geq 7.0$  mmol/L or HbA1c  $\geq 6.5\%$ . Mild decrease eGFR was defined  
5 as eGFR  $< 85$  ml/min/1.73m<sup>2</sup> in men and  $< 75$  ml/min/1.73m<sup>2</sup> in women. Hyperuricemia  
6 means serum uric acid  $> 420$   $\mu$ mol/L in men and  $> 360$   $\mu$ mol/L in women. Dyslipidemia  
7 was defined as the presence of any of the following: TG  $\geq 1.70$  mmol/L or TC  $\geq$   
8 5.18 mmol/L or HDL-C  $< 1.04$  mmol/L or LDL-C  $\geq 3.37$  mmol/L.  
9  
10  
11  
12  
13  
14  
15  
16  
17

### 18 **Statistical Analysis**

19  
20 Continuous variables with a non-normal distribution were expressed as median  
21 (interquartile range), and categorical variables were expressed as percentages.  
22 Differences between groups were tested by Mann-Whitney U test for variables with  
23 skewed distributions and  $\chi^2$ -test for categorical variables. Multiple logistic regression  
24 analysis was conducted to examine the association of RFM and incident hypertension.  
25 RFM was stratified into four quartiles according to sex- specific cut point, odds ratio  
26 (OR) and its 95% confidence interval (CI) were estimated by four models: (a) crude  
27 model; (b) adjusted for age, sex; (c) adjusted for age, sex, smoking, alcohol drinking;  
28 (d) additionally adjusted for uric acid, eGFR, ALT, TG, TC, HDL-C, LDL-C, FPG.  
29 Receiver-operating characteristic curve analyses were conducted to compare predictive  
30 power of RFM with traditional indices including BMI, WC, WHtR. In ROC analysis,  
31 we defined the appropriate cut-off point of each anthropometric index for the prediction  
32 of incident hypertension, by using these indices as test variable and hypertension in  
33 2015 as state variable, the cut-off values were determined by the maximizing the  
34 Youden index. The areas under the ROC curve of different indices were compared using  
35 the method developed by DeLong et al.<sup>18</sup>. All analyses were performed using Spass  
36 version 19.0. Two-tailed p values of  $< 0.05$  were considered statistically significant.  
37  
38  
39  
40  
41  
42  
43  
44  
45  
46  
47  
48  
49

### 50 **Patient and public involvement**

51  
52 There were no patients or public involved in study design, outcome measurement and  
53 results interpretation.  
54  
55  
56

### 57 **Results**

## Baseline characteristics of participants

There were 3382 participants without hypertension at baseline. Baseline clinical characteristics are shown in Table 1. After 6-years of follow-up, 826 individuals developed hypertension. The incidence was 26.3% for men and 22.9% for women. As expected, those who developed hypertension showed a more adverse profile on cardiometabolic parameters—higher uric acid, ALT, FPG, TG, TC, LDL-C level and lower eGFR, LDL-Cholesterol level.

Baseline characteristics of the participants according to RFM quartiles are shown in Table 2. The prevalence of cardiometabolic risk factors such as hyperuricemia, dyslipidemia, and diabetes were increased in proportion to the quartiles of RFM.

## Association between RFM and incident hypertension

Table 3 shows the incidence of hypertension according to quartiles of RFM. Participants with high levels of RFM at baseline were more likely to develop hypertension in the following up, incident cases of hypertension increased as the RFM increased (14.9%, 21.0%, 26.9% and 35.0% in the first, second, third, and fourth quartiles respectively). In unadjusted logistic regression models, compared to the first quartile of RFM levels, the ORs and 95% CI for incident hypertension in the second, the third, and the fourth quartiles were 1.513(1.177-1.945), 2.094(1.643-2.667), and 0.060(2.417-3.874) respectively (p for trend < 0.001). After adjusted for age, sex (model 1) and age, sex, smoking, alcohol drinking (model 2), the associations remained significant. In the fully adjusted model considering additional potential confounders including uric acid, eGFR, ALT, TG, TC, HDL-C, LDL-C, and FPG (model 3), the ORs and 95% CI for incident hypertension comparing the second, third, and fourth quartiles to the first quartile of RFM levels were 1.235(0.953-1.601), 1.528(1.185-1.970), and 2.062(1.594-2.668) respectively (p for trend < 0.001).

## ROC curves for the incidence of hypertension

In logistic regression analysis, we demonstrated RFM can predict incident hypertension. Aiming at comparing its predictive power with traditional anthropometric indices and delineating their optimal cut-points, a ROC analysis was conducted (figure 2). In both sexes, RFM and WHtR had the highest AUC value. In male, RFM had higher AUC value than WC and comparable value to BMI. However, there were no significant differences in AUC value of BMI as compared to WC. In female, RFM had higher AUC

1  
2  
3 value than BMI and comparable value to WC, WC had higher AUC value than BMI.  
4 All indices had higher AUC value in female than in male (Table 4).

5  
6 In male population, the optimal cut-off value was 24.67 for RFM, 23.74 for BMI, 82.95  
7 for WC, 0.51 for WHtR. In female population, the optimal cut-off value was 35.73 for  
8 RFM, 23.83 for BMI, 77.15 for WC, 0.50 for WHtR. In both sexes, RFM and WHtR  
9 had the highest Youden index values for predicting hypertension (Table 5).

## 15 Discussion

16  
17 In our longitudinal study performed in initially non-hypersensitive individuals with 6  
18 years of follow-up, we found an increased risk of incident hypertension across quartiles  
19 of the RFM after adjusted for several known risk factors, which indicate RFM is an  
20 independent and practicable predictor of hypertension in Chinese population.

21  
22 When considering obesity and hypertension, visceral adiposity mediates the  
23 progression from a normotensive to hypertensive. The most robust evidence comes  
24 from the Dallas Heart Study, which measure adipose tissue through magnetic resonance  
25 imaging scanner, they demonstrated visceral adiposity but not total or subcutaneous  
26 adiposity was significantly associated with incident hypertension <sup>19</sup>. Excessive  
27 abdominal adiposity can result in adipocyte dysfunction, which was accompanied by  
28 abnormal proinflammatory cytokines and adipocytokines secretion and increased free  
29 fatty acids in the circulation. These factors can contribute to vascular dysfunction and  
30 systemic insulin resistance, and then leading to increased activation of the renin-  
31 angiotensin-aldosterone system (RAAS), increased sympathetic nervous system (SNS)  
32 activity <sup>20</sup>. Moreover, obesity can cause kidney injury. The compression of the kidneys  
33 by fat can induce inflammation and expansion of renal medullary extracellular matrix,  
34 inhibit renal tubular reabsorption and increase sodium reabsorption, leading to the  
35 development of low estimated GFR and further increases in blood pressure <sup>21</sup>. Thus,  
36 indices which can give a precise assessment of fat mass especially visceral adiposity  
37 may improve the sensitivity and specificity in detecting individuals with increased  
38 cardio-metabolic or hypertension risk.

39  
40 The aim of developing the RFM algorithm was to better reflect estimates of whole-body  
41 fat percentage in clinical and epidemiological practice, it was proved having higher  
42 sensitivity and lower rates of misclassification in obesity estimation when compared to  
43 BMI in US population by its developers, and then validated better than BMI in Mexican  
44  
45  
46  
47  
48  
49  
50  
51  
52  
53  
54  
55  
56  
57  
58  
59  
60

1  
2  
3 population<sup>15 22</sup>. In predicting cardiometabolic risk, RFM also showed excellent  
4 performance. RFM had better discrimination power than BMI in identifying diabetes  
5<sup>15</sup>. In a cohort study, RFM was better than BMI in predicting incident severe liver  
6 disease and overall mortality<sup>23</sup>. However, in our study performed in Chinese population,  
7 we found although RFM can be an effectively index in predicting hypertension, it was  
8 comparable to BMI in men and slightly better than BMI in women in predicting ability.  
9 Two reasons can account for this result. Firstly, the outcome in our study was different  
10 from other current published cross-sectional or cohort study about RFM, although  
11 obesity participate and serve as critical role in the pathophysiological processes of all  
12 these outcome diseases, the confounding factors may be different from each other.  
13 Secondly, according to a recent study performed in Korean population, RFM tend to  
14 overestimated the body fat percentage in their study population, and showed a better  
15 linear relationship with body fat percentage than BMI in men only. In ROC analysis,  
16 they found RFM was not superior to that of BMI in discriminating obese individuals<sup>24</sup>.  
17 As RFM was developed from Mexican-Americans, European-Americans, and African-  
18 Americans, and Asian populations tend to have higher body fat percentage than  
19 Caucasians at the same BMI level<sup>25</sup>. It is possible that the RFM algorithm gives a less  
20 accurate estimation of body fat percentage in Chinese population than in Western  
21 population.

22 RFM and WHtR had the same AUC value in the ROC analysis. The optimal cut-off of  
23 WHtR in our study were 0.51 for male and 0.50 for female, similar to the  
24 recommendations suggested by various studies to define central obesity (WHtR > 0.5),  
25 meanwhile, 0.5 had been demonstrated to be a good boundary value for men and women  
26 across ethnic groups according to the outcome measures related to diabetes and CVD  
27<sup>26-28</sup>. When the WHtR value was 0.5, the corresponding value for RFM were 24 for men  
28 and 36 for women, very close to the optimal cut-off of RFM in our study. Based on  
29 these, we can conclude that a high level of consistency existed between the current  
30 RFM equation and WHtR, and RFM can be an alternative to WHtR in predicting  
31 incident hypertension.

32 In our study, BMI and WC showed similar power in male population, which should be  
33 explained. Indeed, WC can give a better quantity of visceral fat. However, same as our  
34 study, some studies reported that no difference between BMI and WC with regard to  
35 discriminating or predicting obesity-related diseases or mortality<sup>29-32</sup>. In many

1  
2  
3 circumstances especially in Asian populations, BMI and WC are highly correlated,  
4 there were reported studies reveal their ability were comparable in predicting abdominal  
5 adipose tissues which were measured by CT scan<sup>33</sup>.  
6  
7

8 Our study has several strengths. First, our study was performed using nationally  
9 representative samples of the Chinese adult population, which were recruited from  
10 different provinces in China. Second, to our best knowledge, we were the first  
11 longitudinal study to investigate whether the current RFM algorithm can be applied in  
12 hypertension prediction and compare it predicting power with traditional obesity-  
13 related indices. Third, in baseline population, we excluded the individuals with history  
14 of myocardial infarction or stroke, as well as those with moderate-to-severe renal  
15 insufficiency or liver dysfunction, which may affect the association between obesity  
16 and hypertension. This ensure the objectivity and accuracy of our research.  
17  
18

19 There are also limitations of our study. First, we exclude 762 individuals from this study  
20 due to lack of data about the factors we needed to analysis, which may cause selection  
21 bias. Second, medical history taking and biomarker measurements were only carried  
22 out at the baseline, but these parameters may change over time. For example, lifestyle  
23 intervention and pharmacotherapy can result in weight loss and ameliorate metabolic  
24 disorders in some high-risk individuals and reduce the risk of developing hypertension.  
25 However, we failed to take these factors into consideration in our study. Third, although  
26 the blood pressure was measured in duplicate, white-coat hypertension may exist and  
27 affected our judgment of the outcome. Fourth, as the nature of observational study,  
28 when investigate about the association between RFM and incident hypertension, it's  
29 possible that some unknown or unmeasured factors confounded the association;  
30 however, in our logistic analysis, we had adjusted the main confounding factors, we  
31 don't think residual confounding will materially alter our conclusion. Fifth, as the  
32 participants in our study did not underwent dual-energy X-ray absorptiometry test or  
33 other tests which can give an assessment about body component, we couldn't evaluate  
34 the performance and accuracy of the RFM algorithm in Chinese population, this hinder  
35 the further interpretation of our results.  
36  
37  
38  
39  
40  
41  
42  
43  
44  
45  
46  
47  
48  
49  
50  
51  
52  
53

## 54 **Conclusion**

55  
56  
57 In conclusion, our study revealed that RFM is powerful indicator to predict incident  
58 hypertension in Chinese population. However, based on the based on the Youden index  
59  
60

1  
2  
3 in ROC analysis, RFM had the same predictive power with WHtR, and RFM do not  
4 show superiority in predictive power when compared with BMI and WC. The optimal  
5 cut-off for RFM was 24.67 and 35.73 in men and women respectively. Individuals above  
6 the cut-off level show higher risk for hypertension and deserves early intervention to  
7 prevent it.  
8  
9  
10  
11  
12

## 13 **Acknowledgments**

14  
15 This research uses data from the China Health and Nutrition Survey (CHNS) website.  
16 We show grateful thanks to National Institute of Nutrition and Food Safety, China  
17 Center for Disease Control and Prevention, Carolina Population Center, the University  
18 of North Carolina at Chapel Hill, the NIH (R01-HD30880, DK056350, and R01-  
19 HD38700) and the Fogarty International Center, we also thanks to the team from China-  
20 Japan Friendship Hospital, as they launched or supported the CHNS survey and  
21 provided the data we used in this study.  
22  
23  
24  
25  
26  
27  
28  
29  
30

## 31 **Footnotes**

32  
33 **Contributors:** PY and XFY contributed to the study conception and study design. PY,  
34 TH, SLH contributed to the data analysis, interpretation of the data. PY contributed to  
35 drafting the manuscript. All authors read and approved the final manuscript.  
36  
37  
38  
39

40 **Funding:** None.  
41  
42

43 **Competing interests:** The authors declare that they have no competing interests.  
44  
45

46 **Patient consent for publication:** Not required.  
47  
48

49 **Ethics approval:** The survey was approved by the Institutional Review Committees of  
50 the University of North Carolina at Chapel Hill, the National Institute of Nutrition and  
51 Food Safety and Chinese Center for Disease Control and Prevention. All participants  
52 had signed the informed consent forms during the CHNS survey.  
53  
54  
55

56  
57 **Provenance and peer review:** Not commissioned; externally peer reviewed.  
58  
59  
60

**Data availability statement:** All datasets generated for this study are included in the article.

## References

1. Collaborators GBDRF. Global, regional, and national comparative risk assessment of 84 behavioural, environmental and occupational, and metabolic risks or clusters of risks for 195 countries and territories, 1990-2017: a systematic analysis for the Global Burden of Disease Study 2017. *Lancet* 2018;392(10159):1923-94. doi: 10.1016/S0140-6736(18)32225-6 [published Online First: 2018/11/08]
2. Chow CK, Teo KK, Rangarajan S, et al. Prevalence, awareness, treatment, and control of hypertension in rural and urban communities in high-, middle-, and low-income countries. *JAMA* 2013;310(9):959-68. doi: 10.1001/jama.2013.184182
3. Wang Z, Chen Z, Zhang L, et al. Status of Hypertension in China: Results From the China Hypertension Survey, 2012-2015. *Circulation* 2018;137(22):2344-56. doi: 10.1161/CIRCULATIONAHA.117.032380 [published Online First: 2018/02/15]
4. Lavie CJ, De Schutter A, Parto P, et al. Obesity and Prevalence of Cardiovascular Diseases and Prognosis-The Obesity Paradox Updated. *Prog Cardiovasc Dis* 2016;58(5):537-47. doi: 10.1016/j.pcad.2016.01.008 [published Online First: 2016/01/28]
5. Wilson PWF, D'Agostino RB, Sullivan L, et al. Overweight and obesity as determinants of cardiovascular risk: the Framingham experience. *Arch Intern Med* 2002;162(16):1867-72. doi: 10.1001/archinte.162.16.1867
6. Stevens VJ, Obarzanek E, Cook NR, et al. Long-term weight loss and changes in blood pressure: results of the Trials of Hypertension Prevention, phase II. *Annals of internal medicine* 2001;134(1):1-11. doi: 10.7326/0003-4819-134-1-200101020-00007
7. Ma C, Avenell A, Bolland M, et al. Effects of weight loss interventions for adults who are obese on mortality, cardiovascular disease, and cancer: systematic review and meta-analysis. *BMJ* 2017;359:j4849-j49. doi: 10.1136/bmj.j4849

- 1  
2  
3 8. Hayashi T, Boyko EJ, Leonetti DL, et al. Visceral adiposity is an independent  
4 predictor of incident hypertension in Japanese Americans. *Annals of internal*  
5 *medicine* 2004;140(12):992-1000. doi: 10.7326/0003-4819-140-12-  
6 200406150-00008  
7  
8
- 9  
10 9. Hayashi T, Boyko EJ, McNeely MJ, et al. Visceral adiposity, not abdominal  
11 subcutaneous fat area, is associated with an increase in future insulin resistance  
12 in Japanese Americans. *Diabetes* 2008;57(5):1269-75. doi: 10.2337/db07-1378  
13 [published Online First: 2008/02/25]  
14  
15
- 16 10. Sullivan CA, Kahn SE, Fujimoto WY, et al. Change in Intra-Abdominal Fat Predicts  
17 the Risk of Hypertension in Japanese Americans. *Hypertension* 2015;66(1):134-  
18 40. doi: 10.1161/HYPERTENSIONAHA.114.04990 [published Online First:  
19 2015/05/11]  
20  
21
- 22 11. Karlsson T, Rask-Andersen M, Pan G, et al. Contribution of genetics to visceral  
23 adiposity and its relation to cardiovascular and metabolic disease. *Nat Med*  
24 2019;25(9):1390-95. doi: 10.1038/s41591-019-0563-7 [published Online First:  
25 2019/09/09]  
26  
27
- 28 12. Nevill AM, Stewart AD, Olds T, et al. Relationship between adiposity and body  
29 size reveals limitations of BMI. *Am J Phys Anthropol* 2006;129(1):151-56. doi:  
30 10.1002/ajpa.20262  
31  
32
- 33 13. Gómez-Ambrosi J, Silva C, Galofré JC, et al. Body mass index classification misses  
34 subjects with increased cardiometabolic risk factors related to elevated adiposity.  
35 *Int J Obes (Lond)* 2012;36(2):286-94. doi: 10.1038/ijo.2011.100 [published  
36 Online First: 2011/05/17]  
37  
38
- 39 14. Klein S, Allison DB, Heymsfield SB, et al. Waist circumference and  
40 cardiometabolic risk: a consensus statement from shaping America's health:  
41 Association for Weight Management and Obesity Prevention; NAASO, the  
42 Obesity Society; the American Society for Nutrition; and the American  
43 Diabetes Association. *Diabetes care* 2007;30(6):1647-52. doi: 10.2337/dc07-  
44 9921 [published Online First: 2007/03/14]  
45  
46
- 47 15. Woolcott OO, Bergman RN. Relative fat mass (RFM) as a new estimator of whole-  
48 body fat percentage — A cross-sectional study in American adult individuals.  
49 *Sci Rep* 2018;8(1):10980-80. doi: 10.1038/s41598-018-29362-1  
50  
51
- 52 16. Savva SC, Lamnisos D, Kafatos AG. Predicting cardiometabolic risk: waist-to-  
53  
54  
55  
56  
57  
58  
59  
60



- 1  
2  
3 height ratio or BMI. A meta-analysis. *Diabetes Metab Syndr Obes* 2013;6:403-  
4  
5 19. doi: 10.2147/DMSO.S34220  
6  
7 17. Levey AS, Stevens LA, Schmid CH, et al. A new equation to estimate glomerular  
8  
9 filtration rate. *Annals of internal medicine* 2009;150(9):604-12. doi:  
10  
11 10.7326/0003-4819-150-9-200905050-00006 [published Online First:  
12  
13 2009/05/06]  
14  
15 18. DeLong ER, DeLong DM, Clarke-Pearson DL. Comparing the areas under two or  
16  
17 more correlated receiver operating characteristic curves: a nonparametric  
18  
19 approach. *Biometrics* 1988;44(3):837-45.  
20  
21 19. Chandra A, Neeland IJ, Berry JD, et al. The relationship of body mass and fat  
22  
23 distribution with incident hypertension: observations from the Dallas Heart  
24  
25 Study. *J Am Coll Cardiol* 2014;64(10):997-1002. doi:  
26  
27 10.1016/j.jacc.2014.05.057  
28  
29 20. DeMarco VG, Aroor AR, Sowers JR. The pathophysiology of hypertension in  
30  
31 patients with obesity. *Nat Rev Endocrinol* 2014;10(6):364-76. doi:  
32  
33 10.1038/nrendo.2014.44 [published Online First: 2014/04/15]  
34  
35 21. Hall JE, do Carmo JM, da Silva AA, et al. Obesity-induced hypertension: interaction  
36  
37 of neurohumoral and renal mechanisms. *Circ Res* 2015;116(6):991-1006. doi:  
38  
39 10.1161/CIRCRESAHA.116.305697  
40  
41 22. Guzmán-León AE, Velarde AG, Vidal-Salas M, et al. External validation of the  
42  
43 relative fat mass (RFM) index in adults from north-west Mexico using different  
44  
45 reference methods. *PloS one* 2019;14(12):e0226767-e67. doi:  
46  
47 10.1371/journal.pone.0226767  
48  
49 23. Machado MV, Policarpo S, Coutinho J, et al. What Is the Role of the New Index  
50  
51 Relative Fat Mass (RFM) in the Assessment of Nonalcoholic Fatty Liver  
52  
53 Disease (NAFLD)? *Obes Surg* 2020;30(2):560-68. doi: 10.1007/s11695-019-  
54  
55 04213-8  
56  
57 24. Paek JK, Kim J, Kim K, et al. Usefulness of relative fat mass in estimating body  
58  
59 adiposity in Korean adult population. *Endocr J* 2019;66(8):723-29. doi:  
60  
10.1507/endocrj.EJ19-0064 [published Online First: 2019/05/28]  
25. Deurenberg P, Deurenberg-Yap M, Guricci S. Asians are different from Caucasians  
and from each other in their body mass index/body fat per cent relationship.  
*Obes Rev* 2002;3(3):141-46. doi: 10.1046/j.1467-789x.2002.00065.x

- 1  
2  
3  
4  
5  
6  
7  
8  
9  
10  
11  
12  
13  
14  
15  
16  
17  
18  
19  
20  
21  
22  
23  
24  
25  
26  
27  
28  
29  
30  
31  
32  
33  
34  
35  
36  
37  
38  
39  
40  
41  
42  
43  
44  
45  
46  
47  
48  
49  
50  
51  
52  
53  
54  
55  
56  
57  
58  
59  
60
26. Zeng Q, He Y, Dong S, et al. Optimal cut-off values of BMI, waist circumference and waist:height ratio for defining obesity in Chinese adults. *Br J Nutr* 2014;112(10):1735-44. doi: 10.1017/S0007114514002657 [published Online First: 2014/10/10]
  27. Ashwell M, Gibson S. Waist to height ratio is a simple and effective obesity screening tool for cardiovascular risk factors: Analysis of data from the British National Diet And Nutrition Survey of adults aged 19-64 years. *Obes Facts* 2009;2(2):97-103. doi: 10.1159/000203363 [published Online First: 2009/03/31]
  28. Browning LM, Hsieh SD, Ashwell M. A systematic review of waist-to-height ratio as a screening tool for the prediction of cardiovascular disease and diabetes: 0.5 could be a suitable global boundary value. *Nutr Res Rev* 2010;23(2):247-69. doi: 10.1017/S0954422410000144 [published Online First: 2010/09/07]
  29. Pischon T, Boeing H, Hoffmann K, et al. General and abdominal adiposity and risk of death in Europe. *N Engl J Med* 2008;359(20):2105-20. doi: 10.1056/NEJMoa0801891
  30. de Oliveira CM, Ulbrich AZ, Neves FS, et al. Association between anthropometric indicators of adiposity and hypertension in a Brazilian population: Baependi Heart Study. *PloS one* 2017;12(10):e0185225-e25. doi: 10.1371/journal.pone.0185225
  31. Sung KC, Ryu S, Reaven GM, et al. Relationship between obesity and several cardiovascular disease risk factors in apparently healthy Korean individuals: comparison of body mass index and waist circumference. *Metabolism* 2007;56(3):297-303. doi: 10.1016/j.metabol.2006.09.016
  32. Decoda Study G, Nyamdorj R, Qiao Q, et al. BMI compared with central obesity indicators in relation to diabetes and hypertension in Asians. *Obesity (Silver Spring)* 2008;16(7):1622-35. doi: 10.1038/oby.2008.73 [published Online First: 2008/04/10]
  33. Oka R, Miura K, Sakurai M, et al. Comparison of waist circumference with body mass index for predicting abdominal adipose tissue. *Diabetes Res Clin Pract* 2009;83(1):100-05. doi: 10.1016/j.diabres.2008.10.001 [published Online First: 2008/11/18]

1  
2  
3  
4  
5  
6  
7  
8  
9  
10  
11  
12  
13  
14  
15  
16  
17  
18  
19  
20  
21  
22  
23  
24  
25  
26  
27  
28  
29  
30  
31  
32  
33  
34  
35  
36  
37  
38  
39  
40  
41  
42  
43  
44  
45  
46

**Table 1** Baseline characteristics of participates according to follow-up outcomes

|                                    | Incident hypertension |                    | p value |
|------------------------------------|-----------------------|--------------------|---------|
|                                    | no (n=2556)           | yes (n=826)        |         |
| Age                                | 45.0(37.0-54.0)       | 52.0(44.0-59.0)    | < 0.001 |
| Men/Women                          | 1138/1418             | 406/420            | 0.020   |
| Alcohol consumer (%)               | 33                    | 38.9               | 0.002   |
| Smoking                            |                       |                    | 0.324   |
| Current smoker (%)                 | 28.7                  | 30.4               |         |
| Ex smoker (%)                      | 2.0                   | 2.7                |         |
| Non-smoker (%)                     | 69.3                  | 66.9               |         |
| Body weight (Kg)                   | 57.7(52.0-65.2)       | 61.0(54.3-68.7)    | < 0.001 |
| BMI (kg/m <sup>2</sup> )           | 22.38(20.50-24.59)    | 23.80(21.51-26.07) | < 0.001 |
| WC (cm)                            | 80.0(73.0-86.7)       | 84.0(77.5-90.0)    | < 0.001 |
| WHtR                               | 0.50(0.46-0.54)       | 0.52(0.48-0.56)    | < 0.001 |
| RFM                                | 30.15(23.75-36.72)    | 30.92(24.69-38.66) | < 0.001 |
| SBP (mmHg)                         | 116.0(108.0-121.3)    | 120.7(114.7-128.7) | < 0.001 |
| DBP (mmHg)                         | 76.7(70.0-80.0)       | 80.0(75.3-82.0)    | < 0.001 |
| eGFR (mL/min/1.73 m <sup>2</sup> ) | 83.19(74.69-93.12)    | 80.36(72.06-89.68) | < 0.001 |
| Cr (µmol/L)                        | 82.0(74.0-93.0)       | 83.0(75.0-93.0)    | 0.503   |
| Uric acid (µmol/L)                 | 276.0(225.0-338.0)    | 290.0(234.0-352.2) | 0.001   |
| ALT (U/L)                          | 18.0(13.0-25.0)       | 19.0(14.0-28.0)    | < 0.001 |
| FPG (mmol/L)                       | 5.00(4.63-5.45)       | 5.15(4.76-5.64)    | < 0.001 |
| HbA1c (%)                          | 5.4(5.1-5.7)          | 5.6(5.2-5.9)       | < 0.001 |

|                |                 |                 |         |
|----------------|-----------------|-----------------|---------|
| TG (mmol/L)    | 1.13(0.78-1.73) | 1.32(0.90-1.94) | < 0.001 |
| TC (mmol/L)    | 4.63(4.05-5.27) | 4.87(4.24-5.51) | < 0.001 |
| HDL-C (mmol/L) | 1.40(1.18-1.64) | 1.40(1.16-1.64) | 0.819   |
| LDL-C (mmol/L) | 2.78(2.27-3.38) | 2.98(2.42-3.57) | < 0.001 |

Categorical variables were presented as a number (percentage), continuous variables with a skewed distribution were presented as medians (IQR). P values are for Mann-Whitney U test for or  $\chi^2$ -test.

BMI, body mass index; WC, waist circumference; WHtR, waist-to-height ratio; RFM, relative fat mass; SBP, systolic blood pressure; DBP, diastolic blood pressure, eGFR, estimate glomerular filtration rate; Cr, creatinine; ALT, alamine aminotransferase; FPG, fasting plasma glucose; TG, triglyceride; TC, total cholesterol; HDL-C, high-density lipoprotein cholesterol; LDL-C, low-density lipoprotein cholesterol.

**Table 2** Baseline characteristics of participants according to RFM

|                                    | Quartile 1<br>n=850 | Quartile 2<br>n=843 | Quartile 3<br>n=848 | Quartile 4<br>n=841 | p value |
|------------------------------------|---------------------|---------------------|---------------------|---------------------|---------|
| Age                                | 41.0(33.0-50.0)     | 46.0(38.0-54.0)     | 49.0(41.0-57.0)     | 51.0(43.0-58.0)     | < 0.001 |
| Men/Women                          | 387/463             | 387/456             | 386/462             | 384/457             | 0.998   |
| Alcohol consumer (%)               | 30.5                | 34.9                | 35.7                | 36.7                | 0.035   |
| Current smoker (%)                 | 29.2                | 29.3                | 29.0                | 28.9                | 0.290   |
| Body weight (Kg)                   | 52.4(47.7-57.5)     | 57.1(51.8-63.2)     | 60.6(55.0-67.3)     | 66.4(59.1-74.4)     | < 0.001 |
| BMI (kg/m <sup>2</sup> )           | 19.97(18.73-21.21)  | 22.01(20.86-23.25)  | 23.63(22.09-24.93)  | 26.13(24.13-27.75)  | < 0.001 |
| WC (cm)                            | 70.0(67.0-73.0)     | 78.0(75.0-80.0)     | 84.0(81.0-87.0)     | 92.0(88.5-96.5)     | < 0.001 |
| WHtR                               | 0.44(0.42-0.45)     | 0.48(0.47-0.49)     | 0.52(0.51-0.53)     | 0.57(0.56-0.60)     | < 0.001 |
| SBP (mmHg)                         | 110.7(102.7-120.0)  | 117.3(110.0-122.0)  | 119.7(110.0-125.3)  | 120.0(112.0-126.7)  | < 0.001 |
| DBP (mmHg)                         | 73.3(69.3-80.0)     | 77.3(70.0-80.7)     | 79.3(71.3-81.0)     | 80.0(73.3-82.0)     | < 0.001 |
| eGFR (mL/min/1.73 m <sup>2</sup> ) | 86.36(76.49-96.20)  | 81.86(74.50-92.29)  | 81.44(73.26-90.55)  | 80.72(72.15-89.74)  | < 0.001 |
| Cr (µmol/L)                        | 83.0(75.0-93.0)     | 83.0(75.0-93.0)     | 82.0(75.0-93.0)     | 83.0(74.0-93.0)     | 0.860   |
| Uric acid (µmol/L)                 | 264.0(219.0-324.0)  | 274.0(222.0-333.0)  | 280.0(230.0-339.0)  | 302.0(244.0-372.0)  | < 0.001 |
| ALT (U/L)                          | 15.0(11.0-21.0)     | 17.0(12.0-24.0)     | 19.0(14.0-26.0)     | 22.0(16.0-32.0)     | < 0.001 |
| FPG (mmol/L)                       | 4.89(4.53-5.27)     | 4.95(4.62-5.37)     | 5.07(4.67-5.53)     | 5.22(4.84-5.76)     | < 0.001 |

|                   |                 |                 |                 |                 |         |
|-------------------|-----------------|-----------------|-----------------|-----------------|---------|
| HbA1c (%)         | 5.3(5.0-5.6)    | 5.4(5.1-5.7)    | 5.5(5.2-5.8)    | 5.6(5.3-6.0)    | < 0.001 |
| TG (mmol/L)       | 0.94(0.69-1.28) | 1.11(0.77-1.64) | 1.25(0.85-1.92) | 1.50(1.03-2.47) | < 0.001 |
| TC (mmol/L)       | 4.40(3.84-4.95) | 4.64(4.10-5.34) | 4.79(4.17-5.40) | 4.92(4.30-5.59) | < 0.001 |
| HDL-C (mmol/L)    | 1.47(1.28-1.71) | 1.45(1.22-1.69) | 1.39(1.15-1.61) | 1.28(1.09-1.50) | < 0.001 |
| LDL-C (mmol/L)    | 2.58(2.11-3.14) | 2.84(2.30-3.43) | 2.91(2.39-3.49) | 3.02(2.47-3.61) | < 0.001 |
| Hyperuricemia (%) | 5.2             | 9.5             | 12              | 17.4            | < 0.001 |
| Dyslipidemia (%)  | 30.4            | 48              | 56.4            | 69.3            | < 0.001 |
| Diabetes (%)      | 2.8             | 5.1             | 6.8             | 13.0            | < 0.001 |

Categorical variables were presented as a number (percentage), continuous variables with a skewed distribution were presented as medians (IQR). P values are for Mann-Whitney U test for or  $\chi^2$ -test.

BMI, body mass index; WC, waist circumference; WHtR, waist-to-height ratio; RFM, relative fat mass; SBP, systolic blood pressure; DBP, diastolic blood pressure, eGFR, estimate glomerular filtration rate; Cr, creatinine; ALT, alamine aminotransferase; FPG, fasting plasma glucose; TG, triglyceride; TC, total cholesterol; HDL-C, high-density lipoprotein cholesterol; LDL-C, low-density lipoprotein cholesterol.

1  
2  
3  
4  
5  
6  
7  
8  
9  
10  
11  
12  
13  
14  
15  
16  
17  
18  
19  
20  
21  
22  
23  
24  
25  
26  
27  
28  
29  
30  
31  
32  
33  
34  
35  
36  
37  
38  
39  
40  
41  
42  
43  
44  
45  
46

For peer review only

**Table 3** Odds ratios (ORs) and 95% confidence intervals (CI) for incident hypertension according to baseline quartiles of RFM

|                       | Quartile 1<br>(n=850) | Quartile 2<br>(n=843) | Quartile 3<br>(n=848) | Quartile 4<br>(n=841) | p for trend |
|-----------------------|-----------------------|-----------------------|-----------------------|-----------------------|-------------|
| Incident hypertention | 127                   | 177                   | 228                   | 294                   | < 0.001     |
| Unadjusted            | 1                     | 1.513(1.177-1.945)    | 2.094(1.643-2.667)    | 3.060(2.417-3.874)    | < 0.001     |
| Model 1               | 1                     | 1.296(1.003-1.676)    | 1.632(1.272-2.095)    | 2.292(1.795-2.926)    | < 0.001     |
| Model 2               | 1                     | 1.280(0.990-1.656)    | 1.606(1.250-2.063)    | 2.253(1.763-2.879)    | < 0.001     |
| Model 3               | 1                     | 1.235(0.953-1.601)    | 1.528(1.185-1.970)    | 2.062(1.594-2.668)    | < 0.001     |

Model 1: adjusted for age, sex  
 Model 2: adjusted for age, sex, smoking, alcohol drinking  
 Model 3: adjusted for age, sex, smoking, alcohol drinking, uric acid, eGFR, ALT, TG, TC, HDL-C, LDL-C, FPG  
 eGFR, estimate glomerular filtration rate; ALT, alamine aminotransferase; TG, triglyceride; TC, total cholesterol; HDL-C, high-density lipoprotein cholesterol; LDL-C, low-density lipoprotein cholesterol; FPG, fasting plasma glucose.

**Table 4** AUCs for each anthropometric index in predicting hypertension

|      | Men                |         | Women              |         |
|------|--------------------|---------|--------------------|---------|
|      | AUC(95%CI)         | p value | AUC(95%CI)         | p value |
| RFM  | 0.593(0.561-0.625) | < 0.001 | 0.647(0.617-0.677) | < 0.001 |
| BMI  | 0.591(0.558-0.623) | < 0.001 | 0.615(0.584-0.646) | < 0.001 |
| WC   | 0.579(0.547-0.612) | < 0.001 | 0.644(0.614-0.674) | < 0.001 |
| WHtR | 0.593(0.561-0.625) | < 0.001 | 0.647(0.617-0.677) | < 0.001 |

AUC, area under the curve; BMI, body mass index; WC, waist circumference; WHtR, waist-to-height ratio; RFM, relative fat mass



1  
2  
3  
4  
5  
6  
7  
8  
9  
10  
11  
12  
13  
14  
15  
16  
17  
18  
19  
20  
21  
22  
23  
24  
25  
26  
27  
28  
29  
30  
31  
32  
33  
34  
35  
36  
37  
38  
39  
40  
41  
42  
43  
44  
45  
46

**Table 5** Optimal cutoff points for each anthropometric index in predicting hypertension

|      | Men     |                 |                 |              | Women   |                 |                 |              |
|------|---------|-----------------|-----------------|--------------|---------|-----------------|-----------------|--------------|
|      | Cut off | Sensitivity (%) | Specificity (%) | Youden index | Cut off | Sensitivity (%) | Specificity (%) | Youden index |
| RFM  | 24.67   | 0.51            | 0.65            | 0.16         | 35.73   | 0.76            | 0.47            | 0.22         |
| BMI  | 23.74   | 0.48            | 0.67            | 0.15         | 23.83   | 0.53            | 0.67            | 0.20         |
| WC   | 82.95   | 0.58            | 0.55            | 0.13         | 77.15   | 0.76            | 0.46            | 0.21         |
| WHtR | 0.51    | 0.51            | 0.65            | 0.16         | 0.50    | 0.76            | 0.47            | 0.22         |

AUC, area under the curve; BMI, body mass index; WC, waist circumference; WHtR, waist-to-height ratio; RFM, relative fat mass

FO peer review only

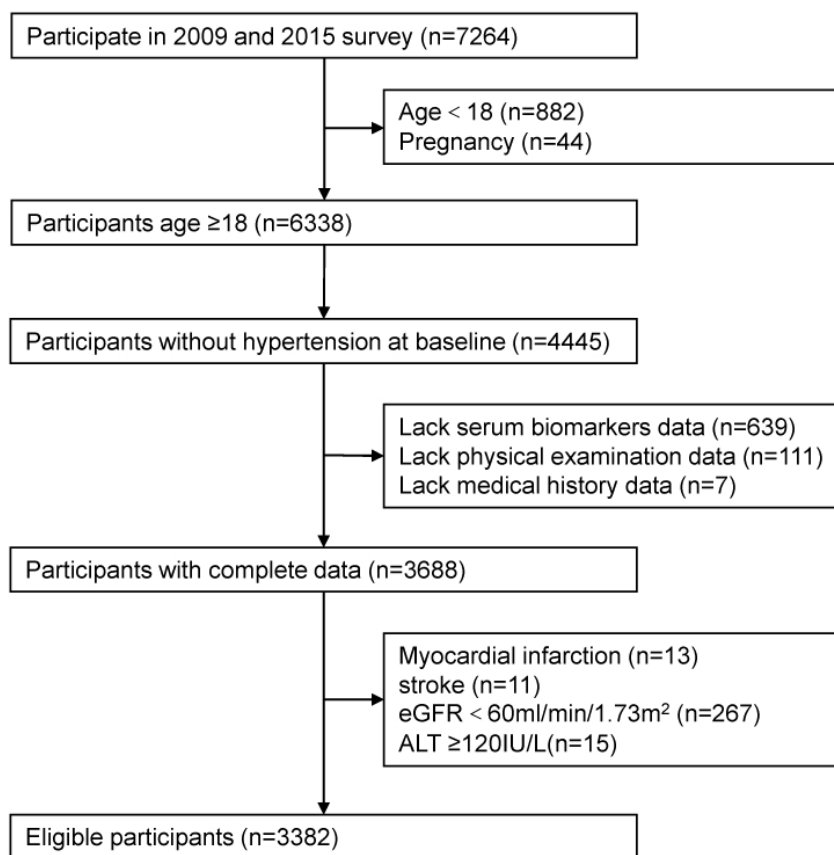

Figure 1 The flow chart of sample selection from the China Health and Nutrition Survey

1  
2  
3  
4  
5  
6  
7  
8  
9  
10  
11  
12  
13  
14  
15  
16  
17  
18  
19  
20  
21  
22  
23  
24  
25  
26  
27  
28  
29  
30  
31  
32  
33  
34  
35  
36  
37  
38  
39  
40  
41  
42  
43  
44  
45  
46  
47  
48  
49  
50  
51  
52  
53  
54  
55  
56  
57  
58  
59  
60

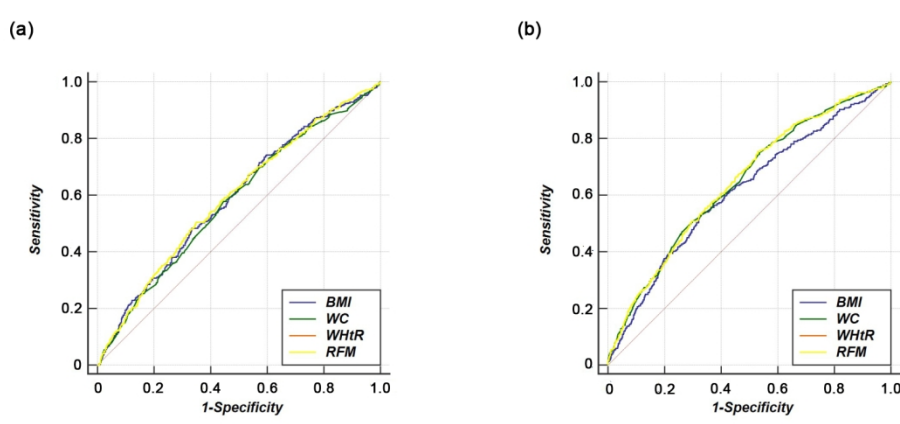

Figure 2 Receive-operating characteristic curves (ROC) of BMI, WC, WHtR, and RFM for incident hypertension.

**STROBE 2007 (v4) checklist of items to be included in reports of observational studies in epidemiology\***  
**Checklist for cohort, case-control, and cross-sectional studies (combined)**

| Section/Topic             | Item # | Recommendation                                                                                                                                                                                                                                                                                                                                                                                                                                                         | Reported on page # |
|---------------------------|--------|------------------------------------------------------------------------------------------------------------------------------------------------------------------------------------------------------------------------------------------------------------------------------------------------------------------------------------------------------------------------------------------------------------------------------------------------------------------------|--------------------|
| Title and abstract        | 1      | (a) Indicate the study's design with a commonly used term in the title or the abstract                                                                                                                                                                                                                                                                                                                                                                                 | 1                  |
|                           |        | (b) Provide in the abstract an informative and balanced summary of what was done and what was found                                                                                                                                                                                                                                                                                                                                                                    | 2                  |
| <b>Introduction</b>       |        |                                                                                                                                                                                                                                                                                                                                                                                                                                                                        |                    |
| Background/rationale      | 2      | Explain the scientific background and rationale for the investigation being reported                                                                                                                                                                                                                                                                                                                                                                                   | 3,4                |
| Objectives                | 3      | State specific objectives, including any pre-specified hypotheses                                                                                                                                                                                                                                                                                                                                                                                                      | 4                  |
| <b>Methods</b>            |        |                                                                                                                                                                                                                                                                                                                                                                                                                                                                        |                    |
| Study design              | 4      | Present key elements of study design early in the paper                                                                                                                                                                                                                                                                                                                                                                                                                | 4                  |
| Setting                   | 5      | Describe the setting, locations, and relevant dates, including periods of recruitment, exposure, follow-up, and data collection                                                                                                                                                                                                                                                                                                                                        | 4                  |
| Participants              | 6      | (a) <i>Cohort study</i> —Give the eligibility criteria, and the sources and methods of selection of participants. Describe methods of follow-up<br><i>Case-control study</i> —Give the eligibility criteria, and the sources and methods of case ascertainment and control selection. Give the rationale for the choice of cases and controls<br><i>Cross-sectional study</i> —Give the eligibility criteria, and the sources and methods of selection of participants | 4                  |
|                           |        | (b) <i>Cohort study</i> —For matched studies, give matching criteria and number of exposed and unexposed<br><i>Case-control study</i> —For matched studies, give matching criteria and the number of controls per case                                                                                                                                                                                                                                                 | -                  |
| Variables                 | 7      | Clearly define all outcomes, exposures, predictors, potential confounders, and effect modifiers. Give diagnostic criteria, if applicable                                                                                                                                                                                                                                                                                                                               | 5                  |
| Data sources/ measurement | 8*     | For each variable of interest, give sources of data and details of methods of assessment (measurement). Describe comparability of assessment methods if there is more than one group                                                                                                                                                                                                                                                                                   | 5                  |
| Bias                      | 9      | Describe any efforts to address potential sources of bias                                                                                                                                                                                                                                                                                                                                                                                                              | 4                  |
| Study size                | 10     | Explain how the study size was arrived at                                                                                                                                                                                                                                                                                                                                                                                                                              | 4                  |
| Quantitative variables    | 11     | Explain how quantitative variables were handled in the analyses. If applicable, describe which groupings were chosen and why                                                                                                                                                                                                                                                                                                                                           | 6                  |
| Statistical methods       | 12     | (a) Describe all statistical methods, including those used to control for confounding                                                                                                                                                                                                                                                                                                                                                                                  | 6                  |
|                           |        | (b) Describe any methods used to examine subgroups and interactions                                                                                                                                                                                                                                                                                                                                                                                                    | 6                  |
|                           |        | (c) Explain how missing data were addressed                                                                                                                                                                                                                                                                                                                                                                                                                            | 4                  |
|                           |        | (d) <i>Cohort study</i> —If applicable, explain how loss to follow-up was addressed<br><i>Case-control study</i> —If applicable, explain how matching of cases and controls was addressed                                                                                                                                                                                                                                                                              | 4                  |

|                          |     |                                                                                                                                                                                                              |            |
|--------------------------|-----|--------------------------------------------------------------------------------------------------------------------------------------------------------------------------------------------------------------|------------|
|                          |     | <i>Cross-sectional study</i> —If applicable, describe analytical methods taking account of sampling strategy                                                                                                 |            |
|                          |     | (e) Describe any sensitivity analyses                                                                                                                                                                        | -          |
| <b>Results</b>           |     |                                                                                                                                                                                                              |            |
| Participants             | 13* | (a) Report numbers of individuals at each stage of study—eg numbers potentially eligible, examined for eligibility, confirmed eligible, included in the study, completing follow-up, and analysed            | 4          |
|                          |     | (b) Give reasons for non-participation at each stage                                                                                                                                                         | 4          |
|                          |     | (c) Consider use of a flow diagram                                                                                                                                                                           | 4          |
| Descriptive data         | 14* | (a) Give characteristics of study participants (eg demographic, clinical, social) and information on exposures and potential confounders                                                                     | 6,16,17,18 |
|                          |     | (b) Indicate number of participants with missing data for each variable of interest                                                                                                                          | 4          |
|                          |     | (c) <i>Cohort study</i> —Summarise follow-up time (eg, average and total amount)                                                                                                                             | 6          |
| Outcome data             | 15* | <i>Cohort study</i> —Report numbers of outcome events or summary measures over time                                                                                                                          | 6          |
|                          |     | <i>Case-control study</i> —Report numbers in each exposure category, or summary measures of exposure                                                                                                         | -          |
|                          |     | <i>Cross-sectional study</i> —Report numbers of outcome events or summary measures                                                                                                                           | -          |
| Main results             | 16  | (a) Give unadjusted estimates and, if applicable, confounder-adjusted estimates and their precision (eg, 95% confidence interval). Make clear which confounders were adjusted for and why they were included | 7          |
|                          |     | (b) Report category boundaries when continuous variables were categorized                                                                                                                                    | -          |
|                          |     | (c) If relevant, consider translating estimates of relative risk into absolute risk for a meaningful time period                                                                                             | -          |
| Other analyses           | 17  | Report other analyses done—eg analyses of subgroups and interactions, and sensitivity analyses                                                                                                               | -          |
| <b>Discussion</b>        |     |                                                                                                                                                                                                              |            |
| Key results              | 18  | Summarise key results with reference to study objectives                                                                                                                                                     | 7,8        |
| Limitations              | 19  | Discuss limitations of the study, taking into account sources of potential bias or imprecision. Discuss both direction and magnitude of any potential bias                                                   | 9,10       |
| Interpretation           | 20  | Give a cautious overall interpretation of results considering objectives, limitations, multiplicity of analyses, results from similar studies, and other relevant evidence                                   | 8,9        |
| Generalisability         | 21  | Discuss the generalisability (external validity) of the study results                                                                                                                                        | 10         |
| <b>Other information</b> |     |                                                                                                                                                                                                              |            |
| Funding                  | 22  | Give the source of funding and the role of the funders for the present study and, if applicable, for the original study on which the present article is based                                                | 11         |

\*Give information separately for cases and controls in case-control studies and, if applicable, for exposed and unexposed groups in cohort and cross-sectional studies.

**Note:** An Explanation and Elaboration article discusses each checklist item and gives methodological background and published examples of transparent reporting. The STROBE checklist is best used in conjunction with this article (freely available on the Web sites of PLoS Medicine at <http://www.plosmedicine.org/>, Annals of Internal Medicine at <http://www.annals.org/>, and Epidemiology at <http://www.epidem.com/>). Information on the STROBE Initiative is available at [www.strobe-statement.org](http://www.strobe-statement.org).

# BMJ Open

## Predictive Value of Relative Fat Mass Algorithm for Incident Hypertension: a 6-year Prospective Study in Chinese Population

|                                 |                                                                                                                                                                                                                                                                                                                                                                                                                                                                                                                                                                 |
|---------------------------------|-----------------------------------------------------------------------------------------------------------------------------------------------------------------------------------------------------------------------------------------------------------------------------------------------------------------------------------------------------------------------------------------------------------------------------------------------------------------------------------------------------------------------------------------------------------------|
| Journal:                        | <i>BMJ Open</i>                                                                                                                                                                                                                                                                                                                                                                                                                                                                                                                                                 |
| Manuscript ID                   | bmjopen-2020-038420.R1                                                                                                                                                                                                                                                                                                                                                                                                                                                                                                                                          |
| Article Type:                   | Original research                                                                                                                                                                                                                                                                                                                                                                                                                                                                                                                                               |
| Date Submitted by the Author:   | 20-Apr-2020                                                                                                                                                                                                                                                                                                                                                                                                                                                                                                                                                     |
| Complete List of Authors:       | Yu, Peng; Tongji Hospital of Tongji Medical College of Huazhong University of Science and Technology, Department of Internal Medicine huang, teng; Tongji Hospital of Tongji Medical College of Huazhong University of Science and Technology, Department of Internal Medicine hu, senlin; Tongji Hospital of Tongji Medical College of Huazhong University of Science and Technology, Department of Internal Medicine Yu, Xuefeng; Tongji Hospital of Tongji Medical College of Huazhong University of Science and Technology, Department of Internal Medicine |
| <b>Primary Subject Heading</b>: | Cardiovascular medicine                                                                                                                                                                                                                                                                                                                                                                                                                                                                                                                                         |
| Secondary Subject Heading:      | Nutrition and metabolism                                                                                                                                                                                                                                                                                                                                                                                                                                                                                                                                        |
| Keywords:                       | Hypertension < CARDIOLOGY, Diabetes & endocrinology < INTERNAL MEDICINE, PUBLIC HEALTH, Nutrition < TROPICAL MEDICINE, Epidemiology < INFECTIOUS DISEASES                                                                                                                                                                                                                                                                                                                                                                                                       |
|                                 |                                                                                                                                                                                                                                                                                                                                                                                                                                                                                                                                                                 |

SCHOLARONE™  
Manuscripts



I, the Submitting Author has the right to grant and does grant on behalf of all authors of the Work (as defined in the below author licence), an exclusive licence and/or a non-exclusive licence for contributions from authors who are: i) UK Crown employees; ii) where BMJ has agreed a CC-BY licence shall apply, and/or iii) in accordance with the terms applicable for US Federal Government officers or employees acting as part of their official duties; on a worldwide, perpetual, irrevocable, royalty-free basis to BMJ Publishing Group Ltd ("BMJ") its licensees and where the relevant Journal is co-owned by BMJ to the co-owners of the Journal, to publish the Work in this journal and any other BMJ products and to exploit all rights, as set out in our [licence](#).

The Submitting Author accepts and understands that any supply made under these terms is made by BMJ to the Submitting Author unless you are acting as an employee on behalf of your employer or a postgraduate student of an affiliated institution which is paying any applicable article publishing charge ("APC") for Open Access articles. Where the Submitting Author wishes to make the Work available on an Open Access basis (and intends to pay the relevant APC), the terms of reuse of such Open Access shall be governed by a Creative Commons licence – details of these licences and which [Creative Commons](#) licence will apply to this Work are set out in our licence referred to above.

Other than as permitted in any relevant BMJ Author's Self Archiving Policies, I confirm this Work has not been accepted for publication elsewhere, is not being considered for publication elsewhere and does not duplicate material already published. I confirm all authors consent to publication of this Work and authorise the granting of this licence.

1  
2  
3  
4  
5  
6  
7  
8  
9

## Predictive Value of Relative Fat Mass Algorithm for Incident Hypertension: a 6-year Prospective Study in Chinese Population

10 Peng Yu, Teng Huang, Senlin Hu, Xuefeng Yu  
11 Department of Internal Medicine, Tongji Hospital, Huazhong University of Science and  
12 Technology, Wuhan, Hubei 430030, P.R. China  
13

14  
15  
16 **Corresponding author:**

17 Xuefeng Yu, MD, PhD

18 Department of Internal Medicine

19 Tongji Hospital, Tongji Medical College

20 Huazhong University of Science & Technology

21 No.1095, Jiefang Road, Wuhan 430030, China

22  
23  
24  
25  
26  
27  
28  
29  
30  
31  
32  
33  
34  
35  
36  
37  
38  
39  
40  
41  
42  
43  
44  
45  
46  
47  
48  
49  
50  
51  
52  
53  
54  
55  
56  
57  
58  
59  
60

26 Tel and Fax: +8602783663331

27 Email: xfyu188@163.com



## Abstract

**Objectives** Individuals with obesity especially excessive visceral adiposity have high risk for incident hypertension. Recently, a new algorithm named relative fat mass (RFM) was introduced to define obesity. Our aim was to investigate whether it can predict hypertension in Chinese population, and to compare its predictive power with traditional indices including body mass index (BMI), waist circumference (WC), waist-to-height ratio (WHtR).

**Design** A 6-year prospective study.

**Setting** 9 provinces (Hei Long Jiang, Liao Ning, Jiang Su, Shan Dong, He Nan, Hu Bei, Hu Nan, Guang Xi, and Gui Zhou) in China.

**Participants** Those without hypertension in 2009 survey and respond in 2015 survey.

**Intervention** Logistic regression were performed to investigate the association between RFM and incident hypertension. Receiver operating characteristic (ROC) analysis was performed to compare the predictive ability of these indices and define their optimal cut-off values.

**Main outcome measures** Incident hypertension in 2015.

**Results** The prevalence of incident hypertension in 2015 based on RFM quartiles were 14.8%, 21.2%, 26.8% and 35.2% respectively (p for trend < 0.001). In overall population, the Odd ratio (OR) for the highest quartile compared to the lowest quartile for RFM was 2.032(1.567-2.634) in the fully adjusted model. In ROC analysis, RFM and WHtR had the highest AUC value in both sexes, but did not show statistical significance when compared to AUC value of BMI and WC in male and AUC value of WC in female. The pairwise comparison of AUC values for the prediction models contain each obesity index showed statistical insignificance.

**Conclusions** RFM can be a powerful indicator for predicting incident hypertension in Chinese population, but it does not show superiority over BMI, WC, and WHtR in predictive power.

### Strengths and limitations of this study

- Our study was the first study to reveal whether the newly invented RFM algorithm can independently predict incident hypertension in Chinese population and

compare its predicting power with traditional obesity-related indices.

- We used a nationally representative sample and a prospective design to investigate the predictive power of RFM for incident hypertension.
- Potential bias may exist due to the exclusion of individuals whose data were incomplete.
- We can't validate and evaluate the performance of the RFM algorithm to estimate body fat percentage in our study population as the body composition estimates are lacking, which hinders the further interpretation of our results.

## Introduction

During the last three decades, hypertension has been the leading cause for all-cause deaths worldwide <sup>1</sup>. An international survey indicated that the incident rate of hypertension was 40.8% in their multinational study population <sup>2</sup>. In China, 23.2% of adult population had hypertension and another 41.3% were in a pre-hypertension state, however, only 46.9% were aware of the diagnosis and minority were effectively controlled in those who were diagnosed <sup>3</sup>. Statistics present the grim reality, there is no doubt blood pressure-related morbidity and mortality will exert a huge burden. Thus, despite improvement in hypertension diagnosis and treatment, implementing effective measures to identify people at risk and prevent the incident of hypertension is extremely important.

Obesity is a significant risk factor for hypertension, various studies in different ethnic groups have shown this association <sup>4</sup>. For example, the Framingham heart study indicated that 34% of hypertension in men and 62% of hypertension in women can be ascribed to overweight and obesity <sup>5</sup>. On the other hand, weight loss intervention can significantly lower the blood pressure and serve as an effective method for the primary prevention of hypertension <sup>6 7</sup>. Currently, when considering the deleterious effect of obesity, excessive intra-abdominal or visceral adipose tissue not subcutaneous fat were regarded as the main cause for hypertension and other cardio-metabolic abnormalities <sup>8-11</sup>. Thus, a proper assessment of excessive adiposity (defined as the body fat percentage  $\geq 25\%$  in men and  $\geq 35\%$  in women according to the Western Pacific Regional Office and global World Health Organization reference standards <sup>12</sup>) especially central adiposity can effectively identify those at high risk for hypertension.

Body fat mass can be quantified with magnetic resonance imaging (MRI), computed

tomography (CT) and Dual energy X-ray absorptiometry (DXA). However, due to the high cost and limited availability, they are not ideal for large-scale epidemiological screening. In this context, anthropometric indices are widely used to assess body fatness and identifying individuals at risk of cardiometabolic diseases. Currently, there is no consensus about the best anthropometric index in predicting hypertension. Traditional indices such as BMI, WC and WHtR have been applied to assessing the risk of incident hypertension in Chinese population by several studies, and most of them revealed WHtR showed better performance when compared to BMI or WC<sup>13-16</sup>. Moreover, another six adiposity measures including conicity index (CI), lipid accumulation product (LAP), visceral adipose index (VAI), a body shape index (ABSI) and the body adiposity index (BAI) were also used to evaluate the hypertension risk, however, only LAP showed superiority when compared to traditional indices<sup>17-20</sup>; despite this, the equations of these indexes are relatively complex with numerous terms needed. Recently, a simple new algorithm named RFM had been introduced by Woolcott et al. to estimate whole-body fat percentage among adult individuals, they proved it was highly correlated with abdominal obesity and can better predict whole-body fat percentage than BMI, which was validated by dual energy X-ray absorptiometry<sup>21</sup>. Moreover, the main component of RFM equation is height to waist ratio, the converse form of WHtR. Thus, RFM shows great potential in cardiometabolic or hypertension risk assessment. In this study, we performed a 6-year prospective study by using data from the China Health and Nutrition Survey, attempting to investigate whether RFM could be a better anthropometric index for hypertension risk prediction in Chinese population and contribute to the prevention of hypertension.

## Method

### Study subjects

The China Health and Nutrition Survey (CHNS) is an ongoing open cohort aiming at examining the health and nutritional condition and its influencing factors of the participants. To date, ten rounds of survey (1989, 1991, 1993, 1997, 2000, 2004, 2006, 2009, 2011, 2015) have been conducted. It was co-launched by Carolina Population Center at the University of North Carolina at Chapel Hill and the National Institute for Nutrition and Health at the Chinese Center for Disease Control and Prevention. All participants signed an informed consent form during the survey. The cohort profile

provides detailed information on this survey<sup>22</sup>.

Appropriate sample size was calculated using the OpenEpi software program (<http://www.openepi.com/SampleSize/SSCohort.htm>) before initiate the study. Considering 5% level of significance for a two-sided test, 80% power, unexposed/exposed ratio of 1.3, percent of unexposed with outcome = 15 and percent of exposed with outcome = 33 according to the results from the China hypertension survey<sup>23</sup>. Based on these settings, the estimated sample size required was at least 198 subjects.

In this study, we conducted a prospective study among people aged more than 18 years by using the data form the 2009 and 2015 CHNS survey. Subjects who participated in both the 2009 and 2015 survey were enrolled in this study, those who didn't have hypertension in 2009 were set as baseline sample, and the presence of incident hypertension in 2015 was defined as the outcome. First, we excluded subjects aged less than 18 or pregnancy, and those who were hypertensive at baseline. Then, those who had history of myocardial infarction or stroke, chronic kidney disease (eGFR < 60 mL/min/1.73 m<sup>2</sup>), severe hepatic dysfunction (ALT ≥120 IU/L) were excluded. Last, subjects lack data about smoking, drinking, outcome and anthropometric measurement were excluded. Meanwhile, those who have missing data on biomarkers (n=443) were also excluded. Finally, 3406 participants were included in our study (Fig. 1), thus the sample of this study was sufficient. Compared to those who were included in the study, those who were excluded owing to missing data were slightly younger and higher percentage of males, there were no statistically significant differences in BMI, WC, biochemical parameters at baseline and the incidence of hypertension at 2015.

### Data Collection

Characteristics of the participants including general personal characteristics, smoking status, alcohol consumption, medical history were obtained by using face to face interview. Each individual's Height and weight were measured by the investigators according to the standard of protocol, height was measured without shoes to the nearest 0.1 cm using a portable stadiometer, body weight was measured with subjects wearing light clothing without shoes, to the nearest 0.1 kg on a calibrated digital scale, BMI was calculated as weight in kilograms divided by the square of height in meters. When measure waist circumference, the tape was applied horizontally midway between the

1  
2  
3 lower rib margin and the iliac crest. WHtR was waist circumference in centimeters  
4 divided by height in centimeters. RFM was calculated by using the established formula  
5  
6  
7<sup>24</sup>:

$$8 \quad RFM(male) = 64 - (20 \times (\frac{height(m)}{WC(m)}))$$

$$9 \quad RFM(female) = 76 - (20 \times (\frac{height(m)}{WC(m)}))$$

10  
11  
12  
13  
14 Blood pressure was determined in duplicate to improve accuracy, and the average of  
15 the values was reported as the final results. For blood collection, participants were asked  
16 to fast for 6 to 8 hours. Blood were collected in EDTA-3K anticoagulant tube, then  
17 centrifugation at 3000g for 15 min to separate plasma from blood cells. Plasma samples  
18 were stored in cryovial at  $-70^{\circ}\text{C}$  condition and whole blood samples were stored at 2-  
19 8  $^{\circ}\text{C}$  condition. Whole blood was used for testing of glycated hemoglobin HbA1c by  
20 chromatography. Plasma were tested for alanine aminotransfese (ALT), triglycerides  
21 (TG), total cholesterol (TC), high density lipoprotein cholesterol (HDL-C), low density  
22 lipoprotein cholesterol (LDL-C), uric acid, creatinine (Cr), insulin by using automated  
23 biochemistry analyzer. ALT was tested by high-performance liquid chromatography  
24 method. HDL-C, LDL-C were determined by enzymatic method. TG were determined  
25 by CHOD-PAP method and TC were determined by GPO-PAP method. Uric acid was  
26 determined by enzymatic colorimetric method. Glucose was determined by GOD-PAP  
27 method. Insulin was determined by Radioimmunity method. Estimate glomerular  
28 filtration rate (eGFR) was calculated by using the CKD-EPI equation<sup>25</sup>.

## 40 Definitions

41  
42 Hypertension was defined as systolic blood pressure (SBP)  $\geq 140$  mmHg or diastolic  
43 blood pressure (DBP)  $\geq 90$  mmHg, or subjects reported been diagnosed or treated with  
44 anti-hypertensive drugs. Diabetes was defined as previously diagnosed with diabetes or  
45 fasting blood glucose  $\geq 7.0$  mmol/L or HbA1c  $\geq 6.5\%$ . Hyperuricemia means serum uric  
46 acid  $> 420$   $\mu\text{mol/L}$  in men and  $> 360$   $\mu\text{mol/L}$  in women. Dyslipidemia was defined as the  
47 presence of any of the following: TG  $\geq 1.70$  mmol/L or TC  $\geq 5.18$  mmol/L or HDL-C  $<$   
48 1.04 mmol/L or LDL-C  $\geq 3.37$  mmol/L.  
49  
50  
51  
52  
53  
54  
55  
56  
57  
58  
59  
60

## Statistical Analysis

Continuous variables with a non-normal distribution were expressed as median (interquartile range), and categorical variables were expressed as percentages. Differences between groups were tested by Mann-Whitney U test for variables with skewed distributions and  $\chi^2$ -test for categorical variables. Logistic regression analysis was conducted to examine the association of RFM and incident hypertension. RFM was stratified into four quartiles according to sex-specific cut point, odds ratio (OR) and its 95% confidence interval (CI) were estimated by four models: (a) crude model; (b) adjusted for age, sex; (c) adjusted for age, sex, smoking, alcohol drinking; (d) additionally adjusted for uric acid, eGFR, ALT, TG, TC, HDL-C, LDL-C, FPG. Receiver-operating characteristic curve analyses were conducted to compare predictive power of RFM with traditional indices including BMI, WC, WHtR. In ROC analysis, we defined the appropriate cut-off point of each anthropometric index for the prediction of incident hypertension, by using these indices as test variable and hypertension in 2015 as state variable, the cut-off values were determined by the maximizing the Youden index. ROC analysis was also used to evaluate the performance of different models in predicting incident hypertension. The areas under the ROC curve of different indices were compared using the method developed by DeLong et al.<sup>26</sup>. Analyses were performed using Spass version 19.0 and MedCalc v18.2.1. Two-tailed p values of  $< 0.05$  were considered statistically significant.

## Patient and public involvement

There were no patients or public involved in study design, outcome measurement and results interpretation.

## Results

### Baseline characteristics of participants

There were 3406 eligible participants without hypertension at baseline. Baseline characteristics are shown in Table 1. After 6-years of follow-up, 834 individuals developed hypertension. The incidence was 26.5% for men and 22.8% for women. As expected, those who developed hypertension showed a more adverse profile on cardiometabolic parameters—higher uric acid, ALT, FPG, TG, TC, LDL-C level and lower eGFR, LDL-C level.

1  
2  
3 Baseline characteristics of the participants according to RFM quartiles are shown in  
4 Table 2. The prevalence of cardiometabolic risk factors such as hyperuricemia,  
5 dyslipidemia, and diabetes were increased in proportion to the quartiles of RFM.  
6  
7

### 8 **Association between RFM and incident hypertension**

9  
10 Table 3 shows the incidence of hypertension according to quartiles of RFM.  
11 Participants with high levels of RFM at baseline were more likely to develop  
12 hypertension in the following up, incident cases of hypertension increased as the RFM  
13 increased (14.8%, 21.2%, 26.8% and 35.2% in the first, second, third, and fourth  
14 quartiles respectively). In unadjusted logistic regression models, compared to the first  
15 quartile of RFM levels, the ORs and 95% CI for incident hypertension in the second,  
16 the third, and the fourth quartiles were 1.548 (1.205-1.989), 2.117(1.662-2.698), and  
17 3.137(2.478-3.971) respectively (p for trend < 0.001). After adjusted for age, sex  
18 (model 1) and age, sex, smoking, alcohol drinking (model 2), the associations remained  
19 significant. In the fully adjusted model considering additional potential confounders  
20 including uric acid, eGFR, ALT, TG, TC, HDL-C, LDL-C, and FPG (model 3), the  
21 ORs and 95% CI for incident hypertension comparing the second, third, and fourth  
22 quartiles to the first quartile of RFM levels were 1.266(0.977-1.640), 1.513(1.172-  
23 1.953), and 2.032(1.567-2.634) respectively (p for trend < 0.001).  
24  
25  
26  
27  
28  
29  
30  
31  
32  
33  
34

### 35 **ROC curves for the incidence of hypertension**

36 In logistic regression analysis, we demonstrated RFM can independently predict the  
37 onset of hypertension. Aiming at comparing its predictive power with traditional  
38 anthropometric indices and delineating their optimal cut-points, a ROC analysis was  
39 conducted (figure 2). In male, there were no significant differences in AUC value of  
40 RFMas compared to that of WC and BMI (Bonferroni-adjusted p-value > 0.05). In  
41 female, RFM had higher AUC value than that of BMI (Bonferroni-adjusted p-value =  
42 0.047) and comparable value to that of WC (Bonferroni-adjusted p-value > 0.05). In  
43 both sexes, there were no significant differences in AUC value of BMI as compared to  
44 that of WC (Bonferroni-adjusted p-value > 0.05). All indices had higher AUC value in  
45 female than in male (Table 4).  
46  
47  
48  
49  
50  
51  
52  
53

54 In male population, the optimal cut-off value was 24.67 for RFM, 23.74 for BMI, 82.95  
55 for WC, 0.51 for WHtR. In female population, the optimal cut-off value was 35.73 for  
56 RFM, 23.83 for BMI, 77.15 for WC, 0.50 for WHtR. In both sexes, RFM and WHtR  
57 had the highest Youden index values for predicting hypertension (Table 5).  
58  
59  
60

Moreover, AUC was calculated for the regression models. The effect of each index of obesity plus other risk factors including age, smoking, alcohol drinking, uric acid, eGFR, ALT, TG, TC, HDL-C, LDL-C, and FPG in predicting hypertension were evaluated. For both male and female population, there were no statistical differences among the AUC values of the four models when compared in a pairwise manner (all Bonferroni-adjusted p-value > 0.05). (Table 6).

## Discussion

In our longitudinal study performed in initially non-hypersensitive individuals with 6 years of follow-up, we found an increased risk of incident hypertension across quartiles of RFM after adjusted for several known risk factors, which indicate RFM is an independent and practicable predictor of hypertension in Chinese population.

When considering obesity and hypertension, visceral adiposity mediates the progression from a normotensive to hypertensive. The most robust evidence comes from the Dallas Heart Study, which measure adipose tissue through magnetic resonance imaging scanner, they demonstrated visceral adiposity but not total or subcutaneous adiposity was significantly associated with incident hypertension<sup>27</sup>. Excessive abdominal adiposity can result in adipocyte dysfunction, which was accompanied by abnormal proinflammatory cytokines and adipocytokines secretion and increased free fatty acids in the circulation. These factors can contribute to vascular dysfunction and systemic insulin resistance, and then leading to increased activation of the renin-angiotensin-aldosterone system (RAAS), increased sympathetic nervous system (SNS) activity<sup>28</sup>. Moreover, obesity can cause kidney injury. The compression of the kidneys by fat can induce inflammation and expansion of renal medullary extracellular matrix, inhibit renal tubular reabsorption and increase sodium reabsorption, leading to the development of low estimated GFR and further increases in blood pressure<sup>29</sup>. Thus, indices which can give a precise assessment of fat mass especially visceral adiposity may improve the sensitivity and specificity in detecting individuals with increased cardio-metabolic or hypertension risk.

The aim of developing the RFM algorithm was to better reflect estimates of whole-body fat percentage in clinical and epidemiological practice, it was proved having higher sensitivity and lower rates of misclassification in obesity estimation when compared to BMI in US population by its developers, and then validated better than BMI in Mexican



1  
2  
3 population<sup>24 30</sup>. In predicting cardiometabolic risk, RFM also showed excellent  
4 performance. RFM had better discrimination power than BMI in identifying diabetes  
5 (AUC: 0.80 vs. 0.76 for men and AUC: 0.79 vs 0.73 for women)<sup>24</sup>. In a cohort study,  
6 RFM was better than BMI in predicting incident severe liver disease and overall  
7 mortality<sup>31</sup>. However, in our study performed in Chinese population, we found  
8 although RFM can be an effectively index in predicting hypertension, it was  
9 comparable to BMI in men and slightly better than BMI in women in predicting ability.  
10 Two reasons can account for this result. Firstly, the outcome in our study was different  
11 from other current published cross-sectional or cohort study about RFM, although  
12 obesity participate and serve as critical role in the pathophysiological processes of all  
13 these outcome diseases, the confounding factors may be different from each other.  
14 Secondly, according to a recent study performed in Korean population, RFM tend to  
15 overestimated the body fat percentage in their study population, and showed a better  
16 linear relationship with body fat percentage than BMI in men only. In ROC analysis,  
17 they found RFM was not superior to that of BMI in discriminating obese individuals<sup>32</sup>.  
18 As RFM was developed from Mexican-Americans, European-Americans, and African-  
19 Americans, and Asian populations tend to have higher body fat percentage than  
20 Caucasians at the same BMI level<sup>33</sup>. The efficiency of the RFM algorithm for  
21 estimating body fat percentage in Chinese population is unknown and needs further  
22 validation study.

23  
24 RFM and WHtR had the same AUC value in the ROC analysis. The optimal cut-off of  
25 WHtR in our study were 0.51 for male and 0.50 for female, similar to the  
26 recommendations suggested by various studies to define central obesity (WHtR > 0.5),  
27 meanwhile, 0.5 had been demonstrated to be a good boundary value for men and women  
28 across ethnic groups according to the outcome measures related to diabetes and CVD  
29<sup>34-36</sup>. When the WHtR value was 0.5, the corresponding value for RFM were 24 for men  
30 and 36 for women, very close to the optimal cut-off of RFM in our study. Based on  
31 these, we can conclude that a high level of consistency existed between the current  
32 RFM equation and WHtR, and RFM can be an alternative to WHtR in predicting  
33 incident hypertension.

34  
35 Overall, in our study, the ROC analysis of the single index in predicting incident  
36 hypertension revealed that WC or WHtR did not show significant superiority over BMI.  
37 Meanwhile the AUCs calculated for the regression models in table 6 further  
38  
39  
40  
41  
42  
43  
44  
45  
46  
47  
48  
49  
50  
51  
52  
53  
54  
55  
56  
57  
58  
59  
60

1  
2  
3 demonstrated this. Indeed, as BMI does not distinguish fat mass from lean mass and  
4 does not reflect fat distribution<sup>37 38</sup>, WC and index based on WC may give a better  
5 quantity of visceral fat. However, same as our study, some studies reported that no  
6 difference between BMI and WC/WHtR with regard to discriminating or predicting  
7 hypertension<sup>39-43</sup>, and some reported BMI showed a better performance<sup>44 45</sup>, which  
8 should be explained. Aside from the different methodology (such as ROC analysis, Cox  
9 regression, Logistic regression) used to judge the performance, study design (cross-  
10 sectional, longitudinal) and covariates taken into consideration, we think two additional  
11 factors may explain the inconsistency between studies. Firstly, the morphological  
12 characteristics of the study participants, in many circumstances especially in Asian  
13 populations, BMI and WC are highly correlated, there were reported studies reveal their  
14 ability were comparable in predicting abdominal adipose tissues which were measured  
15 by CT scan<sup>46</sup>, the high collinearity between BMI and WC-based indices may result in  
16 similar predictive power. Second, the inclusion criteria of the study, some studies were  
17 conducted in the overall population and did not excluded those with organ dysfunction  
18 such as myocardial infarction, heart failure, chronic kidney diseases. These diseases  
19 may lead to changes in hemodynamic load and total fluid volume which mediates the  
20 presence of hypertension, while BMI are sensitive to these changes and thus can provide  
21 information more than adiposity.

22  
23  
24  
25  
26  
27  
28  
29  
30  
31  
32  
33  
34  
35  
36 Our study has several strengths. First, our study was performed using nationally  
37 representative samples of the Chinese adult population, which were recruited from 9  
38 different provinces in China. Second, to our best knowledge, we were the first  
39 longitudinal study to investigate whether the current RFM algorithm can be applied in  
40 hypertension prediction in Chinese population and compare it predicting power with  
41 traditional obesity-related indices. Third, in baseline population, we excluded the  
42 individuals with history of myocardial infarction or stroke, as well as those with chronic  
43 kidney disease or liver dysfunction, which may affect the association between obesity  
44 and hypertension. This ensure the objectivity and accuracy of our research.

45  
46  
47  
48  
49  
50  
51 There are also limitations of our study. First, we exclude 717 individuals from this study  
52 duo to lack of data about the factors we needed to analysis, which may cause selection  
53 bias. Second, medical history taking and biomarker measurements were only carried  
54 out at the baseline, but these parameters may change over time. For example, lifestyle  
55 intervention and pharmacotherapy can result in weight loss and ameliorate metabolic  
56  
57  
58  
59  
60

1  
2  
3 disorders in some high-risk individuals and reduce the risk of developing hypertension.  
4  
5 However, we failed to take these factors into consideration in our study. Third, although  
6  
7 the blood pressure was measured in duplicate, white-coat hypertension may exist and  
8  
9 affected our judgment of the outcome. Fourth, as the nature of observational study,  
10  
11 when investigate about the association between RFM and incident hypertension, it's  
12  
13 possible that some unknown or unmeasured factors confounded the association;  
14  
15 however, in our logistic analysis, we had adjusted the main confounding factors, we  
16  
17 don't think residual confounding will materially alter our conclusion. Fifth, as the  
18  
19 participants in our study did not underwent dual-energy X-ray absorptiometry test or  
20  
21 other tests which can give an assessment about body component, we couldn't evaluate  
22  
23 the performance and accuracy of the RFM algorithm in Chinese population, this hinder  
24  
25 the further interpretation of our results.

## 26 **Conclusion**

27  
28 In conclusion, our study revealed that RFM is a powerful indicator to predict incident  
29  
30 hypertension in Chinese population, the optimal cut-off of RFM was 24.67 and 35.73  
31  
32 for men and women respectively, individuals above the cut-off level show higher risk  
33  
34 for hypertension and deserves early intervention to prevent it. However, based on the  
35  
36 AUC values in ROC analysis, RFM did not show better performance compared to  
37  
38 traditional obesity indices.

## 39 **Acknowledgments**

40  
41 This research uses data from the China Health and Nutrition Survey (CHNS) website.  
42  
43 We show grateful thanks to National Institute of Nutrition and Food Safety, China  
44  
45 Center for Disease Control and Prevention, Carolina Population Center, the University  
46  
47 of North Carolina at Chapel Hill, the NIH (R01-HD30880, DK056350, and R01-  
48  
49 HD38700) and the Fogarty International Center, we also thanks to the team from China-  
50  
51 Japan Friendship Hospital, as they launched or supported the CHNS survey and  
52  
53 provided the data we used in this study.

## 54 **Footnotes**

**Contributors:** PY and XFY contributed to the study conception and study design. PY, TH, SLH contributed to the data analysis, interpretation of the data. PY contributed to drafting the manuscript. All authors read and approved the final manuscript.

**Funding:** None.

**Competing interests:** The authors declare that they have no competing interests.

**Patient consent for publication:** Not required.

**Ethics approval:** The survey was approved by the Institutional Review Committees of the University of North Carolina at Chapel Hill, the National Institute of Nutrition and Food Safety and Chinese Center for Disease Control and Prevention. All participants had signed the informed consent forms during the CHNS survey.

**Provenance and peer review:** Not commissioned; externally peer reviewed.

**Data availability statement:** All datasets generated for this study are included in the article.

## References

1. Collaborators GBDRF. Global, regional, and national comparative risk assessment of 84 behavioural, environmental and occupational, and metabolic risks or clusters of risks for 195 countries and territories, 1990-2017: a systematic analysis for the Global Burden of Disease Study 2017. *Lancet* 2018;392(10159):1923-94. doi: 10.1016/S0140-6736(18)32225-6 [published Online First: 2018/11/08]
2. Chow CK, Teo KK, Rangarajan S, et al. Prevalence, awareness, treatment, and control of hypertension in rural and urban communities in high-, middle-, and low-income countries. *JAMA* 2013;310(9):959-68. doi: 10.1001/jama.2013.184182
3. Wang Z, Chen Z, Zhang L, et al. Status of Hypertension in China: Results From the China Hypertension Survey, 2012-2015. *Circulation* 2018;137(22):2344-56. doi: 10.1161/CIRCULATIONAHA.117.032380 [published Online First: 2018/02/15]
4. Lavie CJ, De Schutter A, Parto P, et al. Obesity and Prevalence of Cardiovascular Diseases and Prognosis-The Obesity Paradox Updated. *Prog Cardiovasc Dis* 2016;58(5):537-47. doi: 10.1016/j.pcad.2016.01.008 [published Online First: 2016/01/28]
5. Wilson PWF, D'Agostino RB, Sullivan L, et al. Overweight and obesity as

- determinants of cardiovascular risk: the Framingham experience. *Arch Intern Med* 2002;162(16):1867-72. doi: 10.1001/archinte.162.16.1867
6. Stevens VJ, Obarzanek E, Cook NR, et al. Long-term weight loss and changes in blood pressure: results of the Trials of Hypertension Prevention, phase II. *Annals of internal medicine* 2001;134(1):1-11. doi: 10.7326/0003-4819-134-1-200101020-00007
7. Ma C, Avenell A, Bolland M, et al. Effects of weight loss interventions for adults who are obese on mortality, cardiovascular disease, and cancer: systematic review and meta-analysis. *BMJ* 2017;359:j4849-j49. doi: 10.1136/bmj.j4849
8. Hayashi T, Boyko EJ, Leonetti DL, et al. Visceral adiposity is an independent predictor of incident hypertension in Japanese Americans. *Annals of internal medicine* 2004;140(12):992-1000. doi: 10.7326/0003-4819-140-12-200406150-00008
9. Hayashi T, Boyko EJ, McNeely MJ, et al. Visceral adiposity, not abdominal subcutaneous fat area, is associated with an increase in future insulin resistance in Japanese Americans. *Diabetes* 2008;57(5):1269-75. doi: 10.2337/db07-1378 [published Online First: 2008/02/25]
10. Sullivan CA, Kahn SE, Fujimoto WY, et al. Change in Intra-Abdominal Fat Predicts the Risk of Hypertension in Japanese Americans. *Hypertension* 2015;66(1):134-40. doi: 10.1161/HYPERTENSIONAHA.114.04990 [published Online First: 2015/05/11]
11. Karlsson T, Rask-Andersen M, Pan G, et al. Contribution of genetics to visceral adiposity and its relation to cardiovascular and metabolic disease. *Nat Med* 2019;25(9):1390-95. doi: 10.1038/s41591-019-0563-7 [published Online First: 2019/09/09]
12. Physical status: the use and interpretation of anthropometry. Report of a WHO Expert Committee. *World Health Organization technical report series* 1995;854:1-452. [published Online First: 1995/01/01]
13. Cai L, Liu A, Zhang Y, et al. Waist-to-height ratio and cardiovascular risk factors among Chinese adults in Beijing. *PloS one* 2013;8(7):e69298. doi: 10.1371/journal.pone.0069298 [published Online First: 2013/07/23]
14. Dong J, Ni YQ, Chu X, et al. Association between the abdominal obesity anthropometric indicators and metabolic disorders in a Chinese population. *Public health* 2016;131:3-10. doi: 10.1016/j.puhe.2015.08.001 [published Online First: 2015/11/19]
15. Savva SC, Lamnisis D, Kafatos AG. Predicting cardiometabolic risk: waist-to-height ratio or BMI. A meta-analysis. *Diabetes Metab Syndr Obes* 2013;6:403-19. doi: 10.2147/dms0.S34220 [published Online First: 2013/11/02]
16. Deng G, Yin L, Liu W, et al. Associations of anthropometric adiposity indexes with hypertension risk: A systematic review and meta-analysis including PURE-China. *Medicine* 2018;97(48):e13262. doi: 10.1097/md.00000000000013262 [published Online First: 2018/12/05]
17. Chen X, Liu Y, Sun X, et al. Comparison of body mass index, waist circumference, conicity index, and waist-to-height ratio for predicting incidence of hypertension: the rural Chinese cohort study. *Journal of human hypertension* 2018;32(3):228-35. doi: 10.1038/s41371-018-0033-6 [published Online First: 2018/02/09]
18. Song J, Zhao Y, Nie S, et al. The effect of lipid accumulation product and its interaction with other factors on hypertension risk in Chinese Han population:

- 1  
2  
3 A cross-sectional study. *PloS one* 2018;13(6):e0198105. doi:  
4 10.1371/journal.pone.0198105 [published Online First: 2018/06/07]  
5  
6 19. Hu L, Hu G, Huang X, et al. Different adiposity indices and their associations with  
7 hypertension among Chinese population from Jiangxi province. *BMC*  
8 *cardiovascular disorders* 2020;20(1):115. doi: 10.1186/s12872-020-01388-2  
9 [published Online First: 2020/03/07]  
10  
11 20. Tong Y, Han E. Associations between body shape, body adiposity and other indices:  
12 a case study of hypertension in Chinese children and adolescents. *Annals of*  
13 *human biology* 2019;46(6):460-66. doi: 10.1080/03014460.2019.1688864  
14 [published Online First: 2019/11/27]  
15  
16 21. Woolcott OO, Bergman RN. Relative fat mass (RFM) as a new estimator of whole-  
17 body fat percentage — A cross-sectional study in American adult individuals.  
18 *Sci Rep* 2018;8(1):10980. doi: 10.1038/s41598-018-29362-1 [published Online  
19 First: 2018/07/22]  
20  
21 22. Popkin BM, Du S, Zhai F, et al. Cohort Profile: The China Health and Nutrition  
22 Survey--monitoring and understanding socio-economic and health change in  
23 China, 1989-2011. *International journal of epidemiology* 2010;39(6):1435-40.  
24 doi: 10.1093/ije/dyp322 [published Online First: 2009/11/06]  
25  
26 23. Wang Z, Chen Z, Zhang L, et al. Status of Hypertension in China: Results From the  
27 China Hypertension Survey, 2012-2015. *Circulation* 2018;137(22):2344-56.  
28 doi: 10.1161/circulationaha.117.032380 [published Online First: 2018/02/17]  
29  
30 24. Woolcott OO, Bergman RN. Relative fat mass (RFM) as a new estimator of whole-  
31 body fat percentage — A cross-sectional study in American adult individuals.  
32 *Sci Rep* 2018;8(1):10980-80. doi: 10.1038/s41598-018-29362-1  
33  
34 25. Levey AS, Stevens LA, Schmid CH, et al. A new equation to estimate glomerular  
35 filtration rate. *Annals of internal medicine* 2009;150(9):604-12. doi:  
36 10.7326/0003-4819-150-9-200905050-00006 [published Online First:  
37 2009/05/06]  
38  
39 26. DeLong ER, DeLong DM, Clarke-Pearson DL. Comparing the areas under two or  
40 more correlated receiver operating characteristic curves: a nonparametric  
41 approach. *Biometrics* 1988;44(3):837-45.  
42  
43 27. Chandra A, Neeland IJ, Berry JD, et al. The relationship of body mass and fat  
44 distribution with incident hypertension: observations from the Dallas Heart  
45 Study. *J Am Coll Cardiol* 2014;64(10):997-1002. doi:  
46 10.1016/j.jacc.2014.05.057  
47  
48 28. DeMarco VG, Aroor AR, Sowers JR. The pathophysiology of hypertension in  
49 patients with obesity. *Nat Rev Endocrinol* 2014;10(6):364-76. doi:  
50 10.1038/nrendo.2014.44 [published Online First: 2014/04/15]  
51  
52 29. Hall JE, do Carmo JM, da Silva AA, et al. Obesity-induced hypertension: interaction  
53 of neurohumoral and renal mechanisms. *Circ Res* 2015;116(6):991-1006. doi:  
54 10.1161/CIRCRESAHA.116.305697  
55  
56 30. Guzmán-León AE, Velarde AG, Vidal-Salas M, et al. External validation of the  
57 relative fat mass (RFM) index in adults from north-west Mexico using different  
58 reference methods. *PloS one* 2019;14(12):e0226767-e67. doi:  
59 10.1371/journal.pone.0226767  
60  
61 31. Machado MV, Policarpo S, Coutinho J, et al. What Is the Role of the New Index  
62 Relative Fat Mass (RFM) in the Assessment of Nonalcoholic Fatty Liver  
63 Disease (NAFLD)? *Obes Surg* 2020;30(2):560-68. doi: 10.1007/s11695-019-  
64 04213-8

- 1
  - 2
  - 3
  - 4
  - 5
  - 6
  - 7
  - 8
  - 9
  - 10
  - 11
  - 12
  - 13
  - 14
  - 15
  - 16
  - 17
  - 18
  - 19
  - 20
  - 21
  - 22
  - 23
  - 24
  - 25
  - 26
  - 27
  - 28
  - 29
  - 30
  - 31
  - 32
  - 33
  - 34
  - 35
  - 36
  - 37
  - 38
  - 39
  - 40
  - 41
  - 42
  - 43
  - 44
  - 45
  - 46
  - 47
  - 48
  - 49
  - 50
  - 51
  - 52
  - 53
  - 54
  - 55
  - 56
  - 57
  - 58
  - 59
  - 60
32. Paek JK, Kim J, Kim K, et al. Usefulness of relative fat mass in estimating body adiposity in Korean adult population. *Endocr J* 2019;66(8):723-29. doi: 10.1507/endocrj.EJ19-0064 [published Online First: 2019/05/28]
33. Deurenberg P, Deurenberg-Yap M, Guricci S. Asians are different from Caucasians and from each other in their body mass index/body fat per cent relationship. *Obes Rev* 2002;3(3):141-46. doi: 10.1046/j.1467-789x.2002.00065.x
34. Zeng Q, He Y, Dong S, et al. Optimal cut-off values of BMI, waist circumference and waist:height ratio for defining obesity in Chinese adults. *Br J Nutr* 2014;112(10):1735-44. doi: 10.1017/S0007114514002657 [published Online First: 2014/10/10]
35. Ashwell M, Gibson S. Waist to height ratio is a simple and effective obesity screening tool for cardiovascular risk factors: Analysis of data from the British National Diet And Nutrition Survey of adults aged 19-64 years. *Obes Facts* 2009;2(2):97-103. doi: 10.1159/000203363 [published Online First: 2009/03/31]
36. Browning LM, Hsieh SD, Ashwell M. A systematic review of waist-to-height ratio as a screening tool for the prediction of cardiovascular disease and diabetes: 0.5 could be a suitable global boundary value. *Nutr Res Rev* 2010;23(2):247-69. doi: 10.1017/S0954422410000144 [published Online First: 2010/09/07]
37. Nevill AM, Stewart AD, Olds T, et al. Relationship between adiposity and body size reveals limitations of BMI. *Am J Phys Anthropol* 2006;129(1):151-56. doi: 10.1002/ajpa.20262
38. Gómez-Ambrosi J, Silva C, Galofré JC, et al. Body mass index classification misses subjects with increased cardiometabolic risk factors related to elevated adiposity. *Int J Obes (Lond)* 2012;36(2):286-94. doi: 10.1038/ijo.2011.100 [published Online First: 2011/05/17]
39. Nyamdorj R, Qiao Q, Lam TH, et al. BMI compared with central obesity indicators in relation to diabetes and hypertension in Asians. *Obesity (Silver Spring)* 2008;16(7):1622-35. doi: 10.1038/oby.2008.73 [published Online First: 2008/04/19]
40. de Oliveira CM, Ulbrich AZ, Neves FS, et al. Association between anthropometric indicators of adiposity and hypertension in a Brazilian population: Baependi Heart Study. *PloS one* 2017;12(10):e0185225. doi: 10.1371/journal.pone.0185225 [published Online First: 2017/10/13]
41. Grootveld LR, Van Valkengoed IG, Peters RJ, et al. The role of body weight, fat distribution and weight change in ethnic differences in the 9-year incidence of hypertension. *Journal of hypertension* 2014;32(5):990-6; discussion 96-7. doi: 10.1097/hjh.000000000000135 [published Online First: 2014/02/27]
42. Nyamdorj R, Qiao Q, Söderberg S, et al. Comparison of body mass index with waist circumference, waist-to-hip ratio, and waist-to-stature ratio as a predictor of hypertension incidence in Mauritius. *Journal of hypertension* 2008;26(5):866-70. doi: 10.1097/HJH.0b013e3282f624b7 [published Online First: 2008/04/10]
43. Rezende AC, Souza LG, Jardim TV, et al. Is waist-to-height ratio the best predictive indicator of hypertension incidence? A cohort study. *BMC public health* 2018;18(1):281. doi: 10.1186/s12889-018-5177-3 [published Online First: 2018/02/27]
44. Li Y, Liu Y, He J, et al. The association of wrist circumference with hypertension in northeastern Chinese residents in comparison with other anthropometric obesity indices. *PeerJ* 2019;7:e7599. doi: 10.7717/peerj.7599 [published Online First: 2019/09/17]

- 1  
2  
3  
4  
5  
6  
7  
8  
9  
10  
11  
12  
13  
14  
15  
16  
17  
18  
19  
20  
21  
22  
23  
24  
25  
26  
27  
28  
29  
30  
31  
32  
33  
34  
35  
36  
37  
38  
39  
40  
41  
42  
43  
44  
45  
46  
47  
48  
49  
50  
51  
52  
53  
54  
55  
56  
57  
58  
59  
60
45. Lam BC, Koh GC, Chen C, et al. Comparison of Body Mass Index (BMI), Body Adiposity Index (BAI), Waist Circumference (WC), Waist-To-Hip Ratio (WHR) and Waist-To-Height Ratio (WHtR) as predictors of cardiovascular disease risk factors in an adult population in Singapore. *PloS one* 2015;10(4):e0122985. doi: 10.1371/journal.pone.0122985 [published Online First: 2015/04/17]
46. Oka R, Miura K, Sakurai M, et al. Comparison of waist circumference with body mass index for predicting abdominal adipose tissue. *Diabetes Res Clin Pract* 2009;83(1):100-05. doi: 10.1016/j.diabres.2008.10.001 [published Online First: 2008/11/18]

For peer review only



**Table 1** Baseline characteristics of participants according to follow-up outcomes

|                                    | Incident hypertension |                    | p value |
|------------------------------------|-----------------------|--------------------|---------|
|                                    | no (n=2572)           | yes (n=834)        |         |
| Age                                | 45.0(37.0-54.0)       | 52.0(44.0-59.0)    | < 0.001 |
| Men/Women                          | 1144/1428             | 413/421            | 0.012   |
| Alcohol consumer (%)               | 32.9                  | 38.8               | 0.002   |
| Smoking                            |                       |                    | 0.303   |
| Current smoker (%)                 | 28.7                  | 30.6               |         |
| Ex smoker (%)                      | 2.0                   | 2.6                |         |
| Non-smoker (%)                     | 69.3                  | 66.8               |         |
| Body weight (Kg)                   | 57.7(52.0-65.2)       | 61.0(54.3-68.9)    | < 0.001 |
| BMI (kg/m <sup>2</sup> )           | 22.37(20.50-24.58)    | 23.80(21.51-26.07) | < 0.001 |
| WC (cm)                            | 80.0(73.0-86.7)       | 84.0(77.9-90.0)    | < 0.001 |
| WHtR                               | 0.50(0.46-0.54)       | 0.52(0.48-0.56)    | < 0.001 |
| RFM                                | 30.18(23.75-36.70)    | 30.83(24.69-38.62) | < 0.001 |
| SBP (mmHg)                         | 116.0(108.0-121.3)    | 120.7(114.9-128.7) | < 0.001 |
| DBP (mmHg)                         | 76.7(70.0-80.0)       | 80.0(75.3-82.0)    | < 0.001 |
| eGFR (mL/min/1.73 m <sup>2</sup> ) | 83.2(74.7-93.2)       | 80.4(72.1-89.7)    | < 0.001 |
| Cr (μmol/L)                        | 82.0(74.0-93.0)       | 83.0(75.0-93.0)    | 0.394   |
| Uric acid (μmol/L)                 | 276.0(225.0-338.8)    | 290.0(234.0-353.0) | 0.001   |
| ALT (U/L)                          | 18.0(13.0-25.0)       | 19.0(14.0-28.0)    | < 0.001 |
| FPG (mmol/L)                       | 5.00(4.63-5.45)       | 5.15(4.76-5.64)    | < 0.001 |
| TG (mmol/L)                        | 1.13(0.78-1.73)       | 1.31(0.90-1.92)    | < 0.001 |

|                |                 |                 |         |
|----------------|-----------------|-----------------|---------|
| TC (mmol/L)    | 4.63(4.05-5.27) | 4.87(4.23-5.51) | < 0.001 |
| HDL-C (mmol/L) | 1.40(1.18-1.64) | 1.40(1.16-1.64) | 0.804   |
| LDL-C (mmol/L) | 2.78(2.26-3.38) | 2.98(2.42-3.57) | < 0.001 |

Categorical variables were presented as a number (percentage), continuous variables with a skewed distribution were presented as medians (IQR). P values are for Mann-Whitney U test for or  $\chi^2$ -test.

BMI, body mass index; WC, waist circumference; WHtR, waist-to-height ratio; RFM, relative fat mass; SBP, systolic blood pressure; DBP, diastolic blood pressure, eGFR, estimate glomerular filtration rate; Cr, creatinine; ALT, alamine aminotransferase; FPG, fasting plasma glucose; TG, triglyceride; TC, total cholesterol; HDL-C, high-density lipoprotein cholesterol; LDL-C, low-density lipoprotein cholesterol.

**Table 2** Baseline characteristics of participants according to RFM

|                                    | Quartile 1<br>n=853 | Quartile 2<br>n=851 | Quartile 3<br>n=853 | Quartile 4<br>n=849 | p value |
|------------------------------------|---------------------|---------------------|---------------------|---------------------|---------|
| Age                                | 41.0(32.0-50.0)     | 45.0(38.0-54.0)     | 49.0(41.0-57.0)     | 51.0(42.0-58.0)     | < 0.001 |
| Men/Women                          | 387/463             | 387/456             | 386/462             | 384/457             | 0.999   |
| Alcohol consumer (%)               | 30.5                | 34.9                | 35.9                | 36.3                | 0.045   |
| Current smoker (%)                 | 29.5                | 29.3                | 29.1                | 28.9                | 0.301   |
| Body weight (Kg)                   | 52.5(47.8-57.6)     | 57.0 (51.7 -63.1)   | 60.6(55.0-67.3)     | 66.4(59.1-74.4)     | < 0.001 |
| BMI (kg/m <sup>2</sup> )           | 19.96 (18.71-21.21) | 21.99 (20.84-23.25) | 23.63(22.09-24.92)  | 26.13(24.12-27.75)  | < 0.001 |
| WC (cm)                            | 70.0(67.0-73.0)     | 78.0(75.0-80.0)     | 84.0(81.0-87.0)     | 92.0(88.5-96.5)     | < 0.001 |
| WHtR                               | 0.44(0.42-0.45)     | 0.48(0.47-0.49)     | 0.52(0.51-0.53)     | 0.57(0.56-0.60)     | < 0.001 |
| SBP (mmHg)                         | 110.7(102.8 -120.0) | 117.3(110.0-122.0)  | 120.0(110.0-125.3)  | 120.0(112.0-126.7)  | < 0.001 |
| DBP (mmHg)                         | 73.3(69.3-80.0)     | 77.3(70.0-80.7)     | 79.3(71.3-81.0)     | 80.0(73.3-82.0)     | < 0.001 |
| eGFR (mL/min/1.73 m <sup>2</sup> ) | 86.-5(76.5 -96.2)   | 81.9 (74.5-92.4)    | 81.4 (73.3 -90.6)   | 80.7 (72.2 -89.7)   | < 0.001 |
| Cr (µmol/L)                        | 83.0(74.5-93.0)     | 83.0(75.0-93.0)     | 82.0(75.0-93.0)     | 83.0(74.0-93.0)     | 0.914   |
| Uric acid (µmol/L)                 | 265.0(219.0-324.0)  | 275.0(222.0-333.0)  | 279.0(230.0-338.0)  | 303.0(244.5 -372.0) | < 0.001 |
| ALT (U/L)                          | 15.0(11.0-22.0)     | 17.0(12.0-24.0)     | 19.0(14.0-26.0)     | 22.0(16.0-32.0)     | < 0.001 |
| FPG (mmol/L)                       | 4.89(4.53-5.27)     | 4.95(4.62-5.38)     | 5.07(4.67-5.53)     | 5.22(4.84-5.76)     | < 0.001 |
| TG (mmol/L)                        | 0.94(0.68-1.28)     | 1.11(0.77-1.65)     | 1.25(0.85-1.92)     | 1.49(1.03-2.46)     | < 0.001 |

|                   |                 |                 |                 |                 |          |
|-------------------|-----------------|-----------------|-----------------|-----------------|----------|
| TC (mmol/L)       | 4.40(3.85-4.96) | 4.64(4.10-5.34) | 4.79(4.17-5.40) | 4.91(4.30-5.57) | < 0.001  |
| HDL-C (mmol/L)    | 1.47(1.28-1.72) | 1.45(1.22-1.69) | 1.39(1.15-1.61) | 1.28(1.09-1.50) | < 0.001  |
| LDL-C (mmol/L)    | 2.58(2.11-3.14) | 2.83(2.29-3.43) | 2.91(2.39-3.50) | 3.00(2.47-3.61) | < 0.001  |
| Hyperuricemia (%) | 5.3             | 9.8             | 12.0            | 17.2            | < 0.001* |
| Dyslipidemia (%)  | 32.5            | 49.2            | 57.6            | 69.4            | < 0.001* |
| Diabetes (%)      | 2.8             | 5.1             | 6.8             | 13.0            | < 0.001* |

Categorical variables were presented as a number (percentage), continuous variables with a skewed distribution were presented as medians (IQR). p values for  $\chi^2$ -test or Kruskal-Wallis test. \*p values for linear trend across quartiles (linear tendency  $\chi^2$ -test).

BMI, body mass index; WC, waist circumference; WHtR, waist-to-height ratio; RFM, relative fat mass; SBP, systolic blood pressure; DBP, diastolic blood pressure, eGFR, estimate glomerular filtration rate; Cr, creatinine; ALT, alamine aminotransferase; FPG, fasting plasma glucose; TG, triglyceride; TC, total cholesterol; HDL-C, high-density lipoprotein cholesterol; LDL-C, low-density lipoprotein cholesterol.

1  
2  
3  
4  
5  
6  
7  
8  
9  
10  
11  
12  
13  
14  
15  
16  
17  
18  
19  
20  
21  
22  
23  
24  
25  
26  
27  
28  
29  
30  
31  
32  
33  
34  
35  
36  
37  
38  
39  
40  
41  
42  
43  
44  
45  
46

For peer review only

**Table 3** Odds ratios (ORs) and 95% confidence intervals (CI) for incident hypertension according to baseline quartiles of RFM

|                       | Quartile 1<br>(n=853) | Quartile 2<br>(n=851) | Quartile 3<br>(n=853) | Quartile 4<br>(n=849) | p for trend |
|-----------------------|-----------------------|-----------------------|-----------------------|-----------------------|-------------|
| Incident hypertension | 126                   | 180                   | 229                   | 299                   | < 0.001     |
| Unadjusted            | 1                     | 1.548 (1.205-1.989)   | 2.117(1.662-2.698)    | 3.137(2.478-3.971)    | < 0.001     |
| Model 1               | 1                     | 1.337 (1.035-1.728)   | 1.662(1.295-2.133)    | 2.360(1.849-3.013)    | < 0.001     |
| Model 2               | 1                     | 1.320(1.021-1.707)    | 1.633(1.272-2.098)    | 2.321(1.817-2.966)    | < 0.001     |
| Model 3               | 1                     | 1.266(0.977-1.640)    | 1.513(1.172-1.953)    | 2.032(1.567-2.634)    | < 0.001     |

Quartiles of RFM for males: 1st Quartile≤20.0, 2nd Quartile = 20.1–23.4, 3rd Quartile =23.5–26.3, 4th quartile≥26.4

Quartiles of RFM for females: 1st Quartile≤33.1, 2nd Quartile= 33.2–36.7, 3rd Quartile = 36.8–39.8, 4th Quartile≥39.9

Model 1: adjusted for age, sex

Model 2: adjusted for age, sex, smoking, alcohol drinking

Model 3: adjusted for age, sex, smoking, alcohol drinking, uric acid, eGFR, ALT, TG, TC, HDL-C, LDL-C, FPG

eGFR, estimate glomerular filtration rate; ALT, alamine aminotransferase; TG, triglyceride; TC, total cholesterol; HDL-C, high-density lipoprotein cholesterol; LDL-C, low-density lipoprotein cholesterol; FPG, fasting plasma glucose.

**Table 4** AUCs for each anthropometric index in predicting hypertension

|      | Men                 |         | Women              |         |
|------|---------------------|---------|--------------------|---------|
|      | AUC(95%CI)          | p value | AUC(95%CI)         | p value |
| RFM  | 0.597 (0.572-0.621) | < 0.001 | 0.647(0.625-0.669) | < 0.001 |
| BMI  | 0.593 (0.568-0.618) | < 0.001 | 0.615(0.592-0.637) | < 0.001 |
| WC   | 0.583 (0.558-0.608) | < 0.001 | 0.644(0.622-0.666) | < 0.001 |
| WHtR | 0.597 (0.572-0.621) | < 0.001 | 0.647(0.625-0.669) | < 0.001 |

AUC, area under the curve; BMI, body mass index; WC, waist circumference; WHtR, waist-to-height ratio; RFM, relative fat mass

1  
2  
3  
4  
5  
6  
7  
8  
9  
10  
11  
12  
13  
14  
15  
16  
17  
18  
19  
20  
21  
22  
23  
24  
25  
26  
27  
28  
29  
30  
31  
32  
33  
34  
35  
36  
37  
38  
39  
40  
41  
42  
43  
44  
45  
46

**Table 5** Optimal cutoff points for each anthropometric index in predicting hypertension

|      | Men     |                 |                 |              | Women   |                 |                 |              |
|------|---------|-----------------|-----------------|--------------|---------|-----------------|-----------------|--------------|
|      | Cut off | Sensitivity (%) | Specificity (%) | Youden index | Cut off | Sensitivity (%) | Specificity (%) | Youden index |
| RFM  | 24.67   | 0.51            | 0.65            | 0.16         | 35.73   | 0.75            | 0.47            | 0.22         |
| BMI  | 23.74   | 0.48            | 0.67            | 0.15         | 23.83   | 0.53            | 0.67            | 0.20         |
| WC   | 82.95   | 0.58            | 0.56            | 0.14         | 77.15   | 0.76            | 0.46            | 0.22         |
| WHtR | 0.51    | 0.51            | 0.65            | 0.16         | 0.50    | 0.75            | 0.47            | 0.22         |

AUC, area under the curve; BMI, body mass index; WC, waist circumference; WHtR, waist-to-height ratio; RFM, relative fat mass

**Table 6** Performance of different models in predicting incident hypertension

|                    | Men                |         | Women               |         |
|--------------------|--------------------|---------|---------------------|---------|
|                    | AUC(95%CI)         | p value | AUC(95%CI)          | p value |
| RFM+other factors  | 0.660(0.636-0.684) | < 0.001 | 0.697 (0.676-0.718) | < 0.001 |
| BMI+other factors  | 0.667(0.643-0.690) | < 0.001 | 0.702(0.680-0.723)  | < 0.001 |
| WC+other factors   | 0.660(0.636-0.684) | < 0.001 | 0.704(0.683-0.725)  | < 0.001 |
| WHtR+other factors | 0.661(0.637-0.685) | < 0.001 | 0.698(0.677-0.719)  | < 0.001 |

Other factors including age, smoking, alcohol drinking, uric acid, eGFR, ALT, TG, TC, HDL-C, LDL-C, FPG.

AUC, area under the curve; BMI, body mass index; WC, waist circumference; WHtR, waist-to-height ratio; RFM, relative fat mass

1  
2  
3  
4  
5  
6 **figure legends**  
7

8 Figure 1 The flow chart of sample selection from the China Health and Nutrition Survey

9 Figure 2 Receive-operating characteristic curves (ROC) of BMI, WC, WHtR, and RFM for incident hypertension  
10  
11  
12  
13  
14  
15  
16  
17  
18  
19  
20  
21  
22  
23  
24  
25  
26  
27  
28  
29  
30  
31  
32  
33  
34  
35  
36  
37  
38  
39  
40  
41  
42  
43  
44  
45  
46

For peer review only



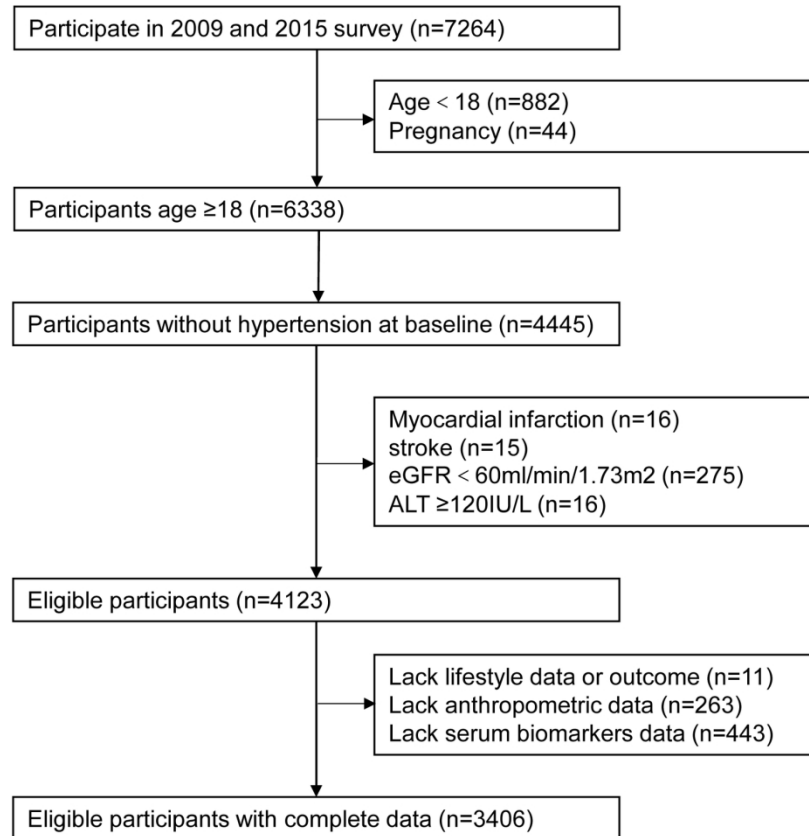

Figure 1 The flow chart of sample selection from the China Health and Nutrition Survey

79x76mm (600 x 600 DPI)

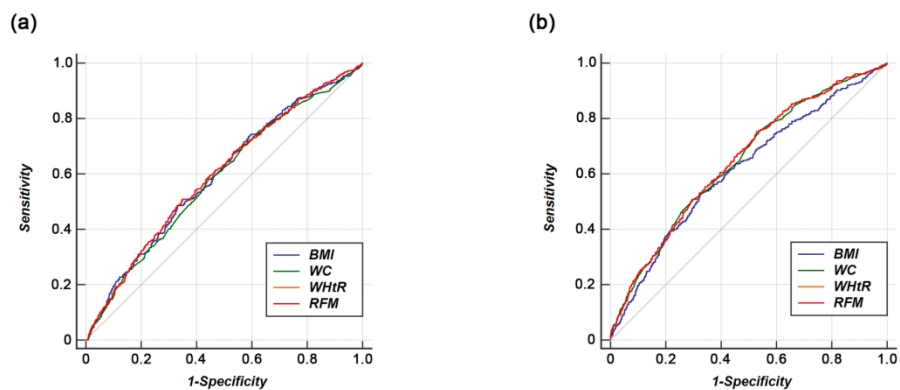

Figure 2 Receive-operating characteristic curves (ROC) of BMI, WC, WHtR, and RFM for incident hypertension

170x75mm (300 x 300 DPI)

**STROBE 2007 (v4) checklist of items to be included in reports of observational studies in epidemiology\***  
**Checklist for cohort, case-control, and cross-sectional studies (combined)**

| Section/Topic             | Item # | Recommendation                                                                                                                                                                                                                                                                                                                                                                                                                                                         | Reported on page # |
|---------------------------|--------|------------------------------------------------------------------------------------------------------------------------------------------------------------------------------------------------------------------------------------------------------------------------------------------------------------------------------------------------------------------------------------------------------------------------------------------------------------------------|--------------------|
| Title and abstract        | 1      | (a) Indicate the study's design with a commonly used term in the title or the abstract                                                                                                                                                                                                                                                                                                                                                                                 | 1                  |
|                           |        | (b) Provide in the abstract an informative and balanced summary of what was done and what was found                                                                                                                                                                                                                                                                                                                                                                    | 2                  |
| <b>Introduction</b>       |        |                                                                                                                                                                                                                                                                                                                                                                                                                                                                        |                    |
| Background/rationale      | 2      | Explain the scientific background and rationale for the investigation being reported                                                                                                                                                                                                                                                                                                                                                                                   | 3,4                |
| Objectives                | 3      | State specific objectives, including any pre-specified hypotheses                                                                                                                                                                                                                                                                                                                                                                                                      | 4                  |
| <b>Methods</b>            |        |                                                                                                                                                                                                                                                                                                                                                                                                                                                                        |                    |
| Study design              | 4      | Present key elements of study design early in the paper                                                                                                                                                                                                                                                                                                                                                                                                                | 4-5                |
| Setting                   | 5      | Describe the setting, locations, and relevant dates, including periods of recruitment, exposure, follow-up, and data collection                                                                                                                                                                                                                                                                                                                                        | 4-5                |
| Participants              | 6      | (a) <i>Cohort study</i> —Give the eligibility criteria, and the sources and methods of selection of participants. Describe methods of follow-up<br><i>Case-control study</i> —Give the eligibility criteria, and the sources and methods of case ascertainment and control selection. Give the rationale for the choice of cases and controls<br><i>Cross-sectional study</i> —Give the eligibility criteria, and the sources and methods of selection of participants | 4-5                |
|                           |        | (b) <i>Cohort study</i> —For matched studies, give matching criteria and number of exposed and unexposed<br><i>Case-control study</i> —For matched studies, give matching criteria and the number of controls per case                                                                                                                                                                                                                                                 | -                  |
| Variables                 | 7      | Clearly define all outcomes, exposures, predictors, potential confounders, and effect modifiers. Give diagnostic criteria, if applicable                                                                                                                                                                                                                                                                                                                               | 6                  |
| Data sources/ measurement | 8*     | For each variable of interest, give sources of data and details of methods of assessment (measurement). Describe comparability of assessment methods if there is more than one group                                                                                                                                                                                                                                                                                   | 5                  |
| Bias                      | 9      | Describe any efforts to address potential sources of bias                                                                                                                                                                                                                                                                                                                                                                                                              | 5                  |
| Study size                | 10     | Explain how the study size was arrived at                                                                                                                                                                                                                                                                                                                                                                                                                              | 5                  |
| Quantitative variables    | 11     | Explain how quantitative variables were handled in the analyses. If applicable, describe which groupings were chosen and why                                                                                                                                                                                                                                                                                                                                           | 7                  |
| Statistical methods       | 12     | (a) Describe all statistical methods, including those used to control for confounding                                                                                                                                                                                                                                                                                                                                                                                  | 7                  |
|                           |        | (b) Describe any methods used to examine subgroups and interactions                                                                                                                                                                                                                                                                                                                                                                                                    | 7                  |
|                           |        | (c) Explain how missing data were addressed                                                                                                                                                                                                                                                                                                                                                                                                                            | 5                  |
|                           |        | (d) <i>Cohort study</i> —If applicable, explain how loss to follow-up was addressed<br><i>Case-control study</i> —If applicable, explain how matching of cases and controls was addressed                                                                                                                                                                                                                                                                              | 5                  |

|                          |     |                                                                                                                                                                                                              |       |
|--------------------------|-----|--------------------------------------------------------------------------------------------------------------------------------------------------------------------------------------------------------------|-------|
|                          |     | <i>Cross-sectional study</i> —If applicable, describe analytical methods taking account of sampling strategy                                                                                                 |       |
|                          |     | (e) Describe any sensitivity analyses                                                                                                                                                                        | -     |
| <b>Results</b>           |     |                                                                                                                                                                                                              |       |
| Participants             | 13* | (a) Report numbers of individuals at each stage of study—eg numbers potentially eligible, examined for eligibility, confirmed eligible, included in the study, completing follow-up, and analysed            | 5     |
|                          |     | (b) Give reasons for non-participation at each stage                                                                                                                                                         | 5     |
|                          |     | (c) Consider use of a flow diagram                                                                                                                                                                           | 5     |
| Descriptive data         | 14* | (a) Give characteristics of study participants (eg demographic, clinical, social) and information on exposures and potential confounders                                                                     | 7     |
|                          |     | (b) Indicate number of participants with missing data for each variable of interest                                                                                                                          | 5     |
|                          |     | (c) <i>Cohort study</i> —Summarise follow-up time (eg, average and total amount)                                                                                                                             | 5     |
| Outcome data             | 15* | <i>Cohort study</i> —Report numbers of outcome events or summary measures over time                                                                                                                          | 8     |
|                          |     | <i>Case-control study</i> —Report numbers in each exposure category, or summary measures of exposure                                                                                                         | -     |
|                          |     | <i>Cross-sectional study</i> —Report numbers of outcome events or summary measures                                                                                                                           | -     |
| Main results             | 16  | (a) Give unadjusted estimates and, if applicable, confounder-adjusted estimates and their precision (eg, 95% confidence interval). Make clear which confounders were adjusted for and why they were included | 8     |
|                          |     | (b) Report category boundaries when continuous variables were categorized                                                                                                                                    | -     |
|                          |     | (c) If relevant, consider translating estimates of relative risk into absolute risk for a meaningful time period                                                                                             | -     |
| Other analyses           | 17  | Report other analyses done—eg analyses of subgroups and interactions, and sensitivity analyses                                                                                                               | 8     |
| <b>Discussion</b>        |     |                                                                                                                                                                                                              |       |
| Key results              | 18  | Summarise key results with reference to study objectives                                                                                                                                                     | 9     |
| Limitations              | 19  | Discuss limitations of the study, taking into account sources of potential bias or imprecision. Discuss both direction and magnitude of any potential bias                                                   | 10,11 |
| Interpretation           | 20  | Give a cautious overall interpretation of results considering objectives, limitations, multiplicity of analyses, results from similar studies, and other relevant evidence                                   | 10    |
| Generalisability         | 21  | Discuss the generalisability (external validity) of the study results                                                                                                                                        | 12    |
| <b>Other information</b> |     |                                                                                                                                                                                                              |       |
| Funding                  | 22  | Give the source of funding and the role of the funders for the present study and, if applicable, for the original study on which the present article is based                                                | 13    |

\*Give information separately for cases and controls in case-control studies and, if applicable, for exposed and unexposed groups in cohort and cross-sectional studies.

**Note:** An Explanation and Elaboration article discusses each checklist item and gives methodological background and published examples of transparent reporting. The STROBE checklist is best used in conjunction with this article (freely available on the Web sites of PLoS Medicine at <http://www.plosmedicine.org/>, Annals of Internal Medicine at <http://www.annals.org/>, and Epidemiology at <http://www.epidem.com/>). Information on the STROBE Initiative is available at [www.strobe-statement.org](http://www.strobe-statement.org).

# BMJ Open

## Predictive Value of Relative Fat Mass Algorithm for Incident Hypertension: a 6-year Prospective Study in Chinese Population

|                                 |                                                                                                                                                                                                                                                                                                                                                                                                                                                                                                                                                                 |
|---------------------------------|-----------------------------------------------------------------------------------------------------------------------------------------------------------------------------------------------------------------------------------------------------------------------------------------------------------------------------------------------------------------------------------------------------------------------------------------------------------------------------------------------------------------------------------------------------------------|
| Journal:                        | <i>BMJ Open</i>                                                                                                                                                                                                                                                                                                                                                                                                                                                                                                                                                 |
| Manuscript ID                   | bmjopen-2020-038420.R2                                                                                                                                                                                                                                                                                                                                                                                                                                                                                                                                          |
| Article Type:                   | Original research                                                                                                                                                                                                                                                                                                                                                                                                                                                                                                                                               |
| Date Submitted by the Author:   | 06-Aug-2020                                                                                                                                                                                                                                                                                                                                                                                                                                                                                                                                                     |
| Complete List of Authors:       | Yu, Peng; Tongji Hospital of Tongji Medical College of Huazhong University of Science and Technology, Department of Internal Medicine huang, teng; Tongji Hospital of Tongji Medical College of Huazhong University of Science and Technology, Department of Internal Medicine hu, senlin; Tongji Hospital of Tongji Medical College of Huazhong University of Science and Technology, Department of Internal Medicine Yu, Xuefeng; Tongji Hospital of Tongji Medical College of Huazhong University of Science and Technology, Department of Internal Medicine |
| <b>Primary Subject Heading</b>: | Cardiovascular medicine                                                                                                                                                                                                                                                                                                                                                                                                                                                                                                                                         |
| Secondary Subject Heading:      | Nutrition and metabolism                                                                                                                                                                                                                                                                                                                                                                                                                                                                                                                                        |
| Keywords:                       | Hypertension < CARDIOLOGY, Diabetes & endocrinology < INTERNAL MEDICINE, PUBLIC HEALTH, Nutrition < TROPICAL MEDICINE, Epidemiology < INFECTIOUS DISEASES                                                                                                                                                                                                                                                                                                                                                                                                       |
|                                 |                                                                                                                                                                                                                                                                                                                                                                                                                                                                                                                                                                 |

SCHOLARONE™  
Manuscripts



I, the Submitting Author has the right to grant and does grant on behalf of all authors of the Work (as defined in the below author licence), an exclusive licence and/or a non-exclusive licence for contributions from authors who are: i) UK Crown employees; ii) where BMJ has agreed a CC-BY licence shall apply, and/or iii) in accordance with the terms applicable for US Federal Government officers or employees acting as part of their official duties; on a worldwide, perpetual, irrevocable, royalty-free basis to BMJ Publishing Group Ltd ("BMJ") its licensees and where the relevant Journal is co-owned by BMJ to the co-owners of the Journal, to publish the Work in this journal and any other BMJ products and to exploit all rights, as set out in our [licence](#).

The Submitting Author accepts and understands that any supply made under these terms is made by BMJ to the Submitting Author unless you are acting as an employee on behalf of your employer or a postgraduate student of an affiliated institution which is paying any applicable article publishing charge ("APC") for Open Access articles. Where the Submitting Author wishes to make the Work available on an Open Access basis (and intends to pay the relevant APC), the terms of reuse of such Open Access shall be governed by a Creative Commons licence – details of these licences and which [Creative Commons](#) licence will apply to this Work are set out in our licence referred to above.

Other than as permitted in any relevant BMJ Author's Self Archiving Policies, I confirm this Work has not been accepted for publication elsewhere, is not being considered for publication elsewhere and does not duplicate material already published. I confirm all authors consent to publication of this Work and authorise the granting of this licence.

1  
2  
3  
4  
5  
6  
7  
8  
9

## Predictive Value of Relative Fat Mass Algorithm for Incident Hypertension: a 6-year Prospective Study in Chinese Population

10 Peng Yu, Teng Huang, Senlin Hu, Xuefeng Yu  
11 Department of Internal Medicine, Tongji Hospital, Huazhong University of Science and  
12 Technology, Wuhan, Hubei 430030, P.R. China  
13

14  
15  
16 **Corresponding author:**

17 Xuefeng Yu, MD, PhD

18 Department of Internal Medicine

19 Tongji Hospital, Tongji Medical College

20 Huazhong University of Science & Technology

21 No.1095, Jiefang Road, Wuhan 430030, China

22  
23  
24  
25  
26  
27  
28  
29  
30  
31  
32  
33  
34  
35  
36  
37  
38  
39  
40  
41  
42  
43  
44  
45  
46  
47  
48  
49  
50  
51  
52  
53  
54  
55  
56  
57  
58  
59  
60

26 Tel and Fax: +8602783663331

27 Email: xfyu188@163.com

## Abstract

**Objectives** Individuals with obesity especially excessive visceral adiposity have high risk for incident hypertension. Recently, a new algorithm named relative fat mass (RFM) was introduced to define obesity. Our aim was to investigate whether it can predict hypertension in Chinese population, and to compare its predictive power with traditional indices including body mass index (BMI), waist circumference (WC), and waist-to-height ratio (WHtR).

**Design** A 6-year prospective study.

**Setting** 9 provinces (Hei Long Jiang, Liao Ning, Jiang Su, Shan Dong, He Nan, Hu Bei, Hu Nan, Guang Xi, and Gui Zhou) in China.

**Participants** Those without hypertension in 2009 survey and respond in 2015 survey.

**Intervention** Logistic regression were performed to investigate the association between RFM and incident hypertension. Receiver operating characteristic (ROC) analysis was performed to compare the predictive ability of these indices and define their optimal cut-off values.

**Main outcome measures** Incident hypertension in 2015.

**Results** The prevalence of incident hypertension in 2015 based on RFM quartiles were 14.8%, 21.2%, 26.8% and 35.2% respectively (p for trend < 0.001). In overall population, the Odd ratio (OR) for the highest quartile compared to the lowest quartile for RFM was 2.032(1.567-2.634) in the fully adjusted model. In ROC analysis, RFM and WHtR had the highest AUC value in both sexes, but did not show statistical significance when compared to AUC value of BMI and WC in male and AUC value of WC in female. The pairwise comparison of AUC values for the prediction models contain each obesity index showed statistical insignificance.

**Conclusions** RFM can be a powerful indicator for predicting incident hypertension in Chinese population, but it does not show superiority over BMI, WC, and WHtR in predictive power.

### Strengths and limitations of this study

- Our study was the first study to reveal whether the newly invented RFM algorithm can independently predict incident hypertension in Chinese population and



compare its predicting power with traditional obesity-related indices.

- We used a nationally representative sample and a prospective design to investigate the predictive power of RFM for incident hypertension.
- Physical examinations and biomarker measurements were only carried out at baseline and the follow-up recordings were lacking in this study.
- We can't validate and evaluate the performance of the RFM algorithm in estimating body fat percentage in our study population, which hinders the further interpretation of our results.

## Introduction

During the last three decades, hypertension has been the leading cause for all-cause deaths worldwide <sup>1</sup>. An international survey indicated that the incident rate of hypertension was 40.8% in their multinational study population <sup>2</sup>. In China, 23.2% of adult population had hypertension and another 41.3% were in a pre-hypertension state, however, only 46.9% were aware of the diagnosis and minority were effectively controlled in those who were diagnosed <sup>3</sup>. Statistics present the grim reality, there is no doubt that blood pressure-related morbidity and mortality will exert a huge burden. Thus, despite improvement in hypertension diagnosis and treatment, implementing effective measures to identify people at risk and prevent the incident of hypertension is extremely important.

Obesity is a significant risk factor for hypertension, various studies in different ethnic groups have shown this association <sup>4</sup>. For example, the Framingham heart study indicated that 34% of hypertension in men and 62% of hypertension in women can be ascribed to overweight and obesity <sup>5</sup>. On the other hand, weight loss intervention can significantly lower the blood pressure and serve as an effective method for the primary prevention of hypertension <sup>6 7</sup>. Currently, when considering the deleterious effect of obesity, excessive intra-abdominal or visceral adipose tissue rather than subcutaneous fat were regarded as the main cause for hypertension and other cardio-metabolic abnormalities <sup>8-11</sup>. Thus, a proper assessment of excessive adiposity (defined as the body fat percentage  $\geq 25\%$  in men and  $\geq 35\%$  in women according to the Western Pacific Regional Office and global World Health Organization reference standards <sup>12</sup>) especially central adiposity can effectively identify those at high risk for hypertension. Body fat mass can be quantified with magnetic resonance imaging (MRI), computed

1  
2  
3 tomography (CT) and Dual energy X-ray absorptiometry (DXA). However, due to the  
4 high cost and limited availability, they are not ideal for large-scale epidemiological  
5 screening. In this context, anthropometric indices are widely used to assess body fatness  
6 and identifying individuals at risk of cardiometabolic diseases. Currently, there is no  
7 consensus about the best anthropometric index in predicting hypertension. Traditional  
8 indices such as BMI, WC and WHtR have been applied to assessing the risk of incident  
9 hypertension in Chinese population by several studies, and most of them revealed  
10 WHtR showed better performance when compared to BMI or WC <sup>13-16</sup> . Moreover,  
11 another six adiposity measures including conicity index (CI), lipid accumulation  
12 product (LAP), visceral adipose index (VAI), a body shape index (ABSI) and the body  
13 adiposity index (BAI) were also used to evaluate the hypertension risk, however, only  
14 LAP showed superiority when compared to traditional indices <sup>17-20</sup>; despite this, the  
15 equations of these indexes are relatively complex with numerous terms needed.  
16 Recently, a simple new algorithm named RFM had been introduced by Woolcott et al.  
17 to estimate whole-body fat percentage among adult individuals, they proved it was  
18 highly correlated with abdominal obesity and can better predict whole-body fat  
19 percentage than BMI, which was validated by dual energy X-ray absorptiometry <sup>21</sup>.  
20 Moreover, the main component of RFM equation is height to waist ratio, the converse  
21 form of WHtR. Thus, RFM shows great potential in cardiometabolic or hypertension  
22 risk assessment. In this study, we performed a 6-year prospective study by using data  
23 from the China Health and Nutrition Survey, attempting to investigate whether RFM  
24 could be a better anthropometric index for hypertension risk prediction in Chinese  
25 population and contribute to the prevention of hypertension.  
26  
27  
28  
29  
30  
31  
32  
33  
34  
35  
36  
37  
38  
39  
40  
41  
42  
43  
44

## 45 **Method**

### 46 **Study subjects**

47 The China Health and Nutrition Survey (CHNS) is an ongoing open cohort aiming at  
48 examining the health and nutritional condition and its influencing factors of the  
49 participants. To date, ten rounds of survey (1989, 1991, 1993, 1997, 2000, 2004, 2006,  
50 2009, 2011, 2015) have been conducted. It was co-launched by Carolina Population  
51 Center at the University of North Carolina at Chapel Hill and the National Institute for  
52 Nutrition and Health at the Chinese Center for Disease Control and Prevention. All  
53 participants signed an informed consent form during the survey. The cohort profile  
54  
55  
56  
57  
58  
59  
60

provides detailed information on this survey <sup>22</sup>.

Appropriate sample size was calculated using the OpenEpi software program (<http://www.openepi.com/SampleSize/SSCohort.htm>) before initiate the study. Considering 5% level of significance for a two-sided test, 80% power, unexposed/exposed ratio of 1.3, percent of unexposed with outcome = 15 and percent of exposed with outcome = 33 according to the results from the China hypertension survey <sup>23</sup>, the estimated sample size required was at least 198 subjects.

In this study, we conducted a prospective study among people aged more than 18 years by using the data form the 2009 and 2015 CHNS survey. Subjects who participated in both the 2009 and 2015 survey were enrolled in this study, those who didn't have hypertension in 2009 were set as baseline sample, and the presence of incident hypertension in 2015 was defined as the outcome. First, we excluded subjects aged less than 18 or pregnancy, and those who were hypertensive at baseline. Then, those who had history of myocardial infarction or stroke, chronic kidney disease ( $eGFR < 60$  mL/min/1.73 m<sup>2</sup>), serve hepatic dysfunction ( $ALT \geq 120$  IU/L) were excluded. Last, subjects lack data about smoking, drinking, outcome and anthropometric measurement were excluded. Meanwhile, those who have missing data on biomarkers (n=443) were also excluded. Finally, 3406 participants were included in our study (Fig. 1), thus the sample of this study was sufficient. Compared to those who were included in the study, those who were excluded owing to missing data were slightly younger and there was a slightly higher percentage of males, there were no statistically significant differences between the two groups in BMI, WC, and biochemical parameters at baseline and in the incidence of hypertension at the final follow-up.

### Data Collection

Characteristics of the participants including general personal characteristics, smoking status, alcohol consumption, and medical history were obtained by using face to face interview. Current smoker was defined as positive answers to the question "Have you ever smoke? Are you still smoking?". Alcohol consumer was defined as positive answers to "In the past year, have you ever drunk beer, liquor or wine? How often do you consume alcohol?". Each individual's Height and weight were measured by the investigators according to the standard of protocol, height was measured without shoes to the nearest 0.1 cm using a portable stadiometer, body weight was measured with

1  
2  
3 subjects wearing light clothing without shoes, to the nearest 0.1 kg on a calibrated  
4 digital scale, BMI was calculated as weight in kilograms divided by the square of height  
5 in meters. When measure waist circumference, the tape was applied horizontally  
6 midway between the lower rib margin and the iliac crest. WHtR was waist  
7 circumference in centimeters divided by height in centimeters. RFM was calculated by  
8 using the following formula<sup>24</sup>:

$$13 \quad RFM(male) = 64 - (20 \times (\frac{height(m)}{WC(m)}))$$

$$16 \quad RFM(female) = 76 - (20 \times (\frac{height(m)}{WC(m)}))$$

19  
20 Blood pressure was determined in duplicate to improve accuracy, and the average of  
21 the values was reported as the final results. For blood collection, participants were asked  
22 to fast for 6 to 8 hours. Blood were collected in EDTA-3K anticoagulant tube, then  
23 centrifugation at 3000g for 15 min to separate plasma from blood cells. Plasma samples  
24 were stored in cryovial at  $-70^{\circ}\text{C}$  condition and whole blood samples were stored at  $2-8^{\circ}\text{C}$   
25 condition. Whole blood was used for testing of glycated hemoglobin HbA1c by  
26 chromatography. Plasma were tested for alanine aminotransferease (ALT), triglycerides  
27 (TG), total cholesterol (TC), high density lipoprotein cholesterol (HDL-C), low density  
28 lipoprotein cholesterol (LDL-C), uric acid, creatinine (Cr), insulin by using automated  
29 biochemistry analyzer. ALT was tested by high-performance liquid chromatography  
30 method. HDL-C, LDL-C were determined by enzymatic method. TG were determined  
31 by CHOD-PAP method and TC were determined by GPO-PAP method. Uric acid was  
32 determined by enzymatic colorimetric method. Glucose was determined by GOD-PAP  
33 method. Insulin was determined by radioimmunity method. Estimate glomerular  
34 filtration rate (eGFR) was calculated by using the CKD-EPI equation<sup>25</sup>.

## 45 **Definitions**

46  
47 Hypertension was defined as systolic blood pressure (SBP)  $\geq 140$  mmHg or diastolic  
48 blood pressure (DBP)  $\geq 90$  mmHg, or subjects reported been diagnosed or treated with  
49 anti-hypertensive drugs. Diabetes was defined as previously diagnosed with diabetes or  
50 fasting blood glucose  $\geq 7.0$  mmol/L or HbA1c  $\geq 6.5\%$ . Hyperuricemia means serum uric  
51 acid  $> 420$   $\mu\text{mol/L}$  in men and  $> 360$   $\mu\text{mol/L}$  in women. Dyslipidemia was defined as the  
52  
53  
54  
55  
56  
57  
58  
59  
60

1  
2  
3 presence of any of the following lipid alterations:  $TG \geq 1.70 \text{ mmol/L}$  or  $TC \geq 5.18 \text{ mmol/L}$   
4  
5  
6 or  $HDL-C < 1.04 \text{ mmol/L}$  or  $LDL-C \geq 3.37 \text{ mmol/L}$ .  
7

## 8 **Statistical Analysis**

9  
10 Continuous variables with a non-normal distribution were expressed as median  
11 (interquartile range), and categorical variables were expressed as percentages.  
12 Differences between groups were tested by Mann-Whitney U test for variables with  
13 skewed distributions and  $\chi^2$ -test for categorical variables. Logistic regression analysis  
14 was conducted to examine the association of RFM and incident hypertension. RFM was  
15 stratified into four quartiles according to sex-specific cut point, odds ratio (OR) and its  
16 95% confidence interval (CI) were estimated by four models: (a) crude model; (b)  
17 adjusted for age, sex; (c) adjusted for age, sex, smoking, alcohol drinking; (d)  
18 additionally adjusted for uric acid, eGFR, ALT, TG, TC, HDL-C, LDL-C, FPG.  
19 Receiver-operating characteristic curve analyses were conducted to compare the  
20 predictive power of RFM with traditional indices including BMI, WC, and WHtR. In  
21 ROC analysis, we defined the appropriate cut-off point of each anthropometric index  
22 for the prediction of incident hypertension, by using these indices as test variable and  
23 hypertension in 2015 as state variable, the optimal cut-off values were determined by  
24 the maximizing the Youden index. ROC analysis was also used to evaluate the  
25 performance of different models in predicting incident hypertension. The areas under  
26 the ROC curve of different indices were compared using the method developed by  
27 DeLong et al.<sup>26</sup>. Analyses were performed using Spass version 19.0 and MedCalc  
28 v18.2.1. Two-tailed p values of less than 0.05 were considered statistically significant.  
29  
30  
31  
32  
33  
34  
35  
36  
37  
38  
39  
40  
41  
42

## 43 **Patient and public involvement**

44  
45 There were no patients or public involved in study design, outcome measurement and  
46 results interpretation.  
47  
48  
49

## 50 **Results**

### 51 **Baseline characteristics of participants**

52  
53 There were 3406 eligible participants without hypertension at baseline. Baseline  
54 characteristics are shown in Table 1. After 6-years of follow-up, 834 individuals  
55 developed hypertension. The incidence was 26.5% for men and 22.8% for women. As  
56  
57  
58  
59  
60

1  
2  
3 expected, those who developed hypertension showed a more adverse profile on  
4 cardiometabolic parameters—higher uric acid, ALT, FPG, TG, TC, LDL-C level and  
5 lower eGFR level.  
6  
7

8  
9 Baseline characteristics of the participants according to RFM quartiles are shown in  
10 Table 2. The prevalence of cardiometabolic risk factors such as hyperuricemia,  
11 dyslipidemia, and diabetes were increased in proportion to the quartiles of RFM.  
12  
13

### 14 **Association between RFM and incident hypertension**

15  
16 Table 3 shows the incidence of hypertension according to quartiles of RFM.  
17 Participants with high levels of RFM at baseline were more likely to develop  
18 hypertension in the following up, as incident cases of hypertension increased as the  
19 RFM increased (14.8%, 21.2%, 26.8% and 35.2% in the first, second, third, and fourth  
20 quartiles respectively). In unadjusted logistic regression models, compared to the first  
21 quartile of RFM levels, the ORs and 95% CI for incident hypertension in the second,  
22 the third, and the fourth quartiles were 1.548 (1.205-1.989), 2.117(1.662-2.698), and  
23 3.137(2.478-3.971) respectively (p for trend < 0.001). After adjusted for age, sex  
24 (model 1) and age, sex, smoking, alcohol drinking (model 2), the associations remained  
25 significant. In the fully adjusted model considering additional potential confounders  
26 including uric acid, eGFR, ALT, TG, TC, HDL-C, LDL-C, and FPG (model 3), the  
27 ORs and 95% CI for incident hypertension comparing the second, third, and fourth  
28 quartiles to the first quartile of RFM levels were 1.266(0.977-1.640), 1.513(1.172-  
29 1.953), and 2.032(1.567-2.634) respectively (p for trend < 0.001).  
30  
31  
32  
33  
34  
35  
36  
37  
38  
39

### 40 **ROC curves for the incidence of hypertension**

41  
42 In logistic regression analysis, we demonstrated RFM can independently predict the  
43 onset of hypertension. Aiming at comparing its predictive power with traditional  
44 anthropometric indices and delineating their optimal cut-points, a ROC analysis was  
45 conducted (figure 2). In male, there were no significant differences in AUC value of  
46 RFM as compared to that of WC and BMI (Bonferroni-adjusted p-value > 0.05). In  
47 female, RFM had higher AUC value than that of BMI (Bonferroni-adjusted p-value =  
48 0.047) and comparable value to that of WC (Bonferroni-adjusted p-value > 0.05). In  
49 both sexes, there were no significant differences in AUC value of BMI as compared to  
50 that of WC (Bonferroni-adjusted p-value > 0.05). All indices had higher AUC value in  
51 female than in male (Table 4).  
52  
53  
54  
55  
56  
57  
58

59 In male population, the optimal cut-off value was 24.67 for RFM, 23.74 for BMI, 82.95  
60

1  
2  
3 for WC, 0.51 for WHtR. In female population, the optimal cut-off value was 35.73 for  
4 RFM, 23.83 for BMI, 77.15 for WC, 0.50 for WHtR. In both sexes, RFM and WHtR  
5 had the highest Youden index values for predicting hypertension (Table 5).  
6

7  
8 Moreover, AUC was calculated for the regression models. The effect of each index of  
9 obesity plus other risk factors including age, smoking, alcohol drinking, uric acid, eGFR,  
10 ALT, TG, TC, HDL-C, LDL-C, and FPG in predicting hypertension were evaluated.  
11 For both male and female population, there were no statistical differences among the  
12 AUC values of the four models when compared in a pairwise manner (all Bonferroni-  
13 adjusted p-value > 0.05). (Table 6).  
14  
15  
16  
17  
18  
19

## 20 **Discussion**

21  
22 In our longitudinal study performed in initially non-hypersensitive individuals with 6  
23 years of follow-up, we found an increased risk of incident hypertension across quartiles  
24 of RFM after adjusted for several known risk factors, which indicate RFM is an  
25 independent and practicable predictor of hypertension in Chinese population.  
26  
27

28 When considering obesity and hypertension, visceral adiposity mediates the  
29 progression from a normotensive to hypertensive. The most robust evidence comes  
30 from the Dallas Heart Study, which measure adipose tissue through magnetic resonance  
31 imaging scanner, they demonstrated visceral adiposity but not total or subcutaneous  
32 adiposity was significantly associated with incident hypertension<sup>27</sup>. Excessive  
33 abdominal adiposity can result in adipocyte dysfunction, which was accompanied by  
34 abnormal proinflammatory cytokines and adipocytokines secretion and increased  
35 concentration of circulating free fatty acids. These factors can contribute to vascular  
36 dysfunction and systemic insulin resistance, and then leading to increased activation of  
37 the renin-angiotensin-aldosterone system (RAAS), increased sympathetic nervous  
38 system (SNS) activity<sup>28</sup>. Moreover, obesity can cause kidney injury. The compression  
39 of the kidneys by fat can induce inflammation and expansion of renal medullary  
40 extracellular matrix, inhibit renal tubular reabsorption and increase sodium  
41 reabsorption, leading to the development of low estimated GFR and further increases  
42 in blood pressure<sup>29</sup>. Thus, indices which can give a precise assessment of fat mass  
43 especially visceral adiposity may improve the sensitivity and specificity in detecting  
44 individuals with increased cardio-metabolic or hypertension risk.  
45  
46  
47  
48  
49  
50  
51  
52  
53  
54  
55  
56  
57  
58

59 The aim of developing the RFM algorithm was to better reflect estimates of whole-body  
60

1  
2  
3 fat percentage in clinical and epidemiological practice, it was proved to have higher  
4 sensitivity and lower rates of misclassification in obesity estimation when compared to  
5 BMI in US population by its developers, and had been proved to be better than BMI in  
6 Mexican population<sup>24 30</sup>. In predicting cardiometabolic risk, RFM also showed  
7 excellent performance. RFM had better discrimination power than BMI in identifying  
8 diabetes (AUC: 0.80 vs. 0.76 for men and AUC: 0.79 vs 0.73 for women)<sup>24</sup>. In a cohort  
9 study, RFM was better than BMI in predicting incident severe liver disease and overall  
10 mortality<sup>31</sup>. However, in our study performed in Chinese population, we found  
11 although RFM can be an effectively index in predicting hypertension, it was  
12 comparable to BMI in men and slightly better than BMI in women in predicting ability.  
13 Two reasons can account for this result. Firstly, the outcome in our study was different  
14 from other current published cross-sectional or cohort study about RFM, although  
15 obesity participate and serve as critical role in the pathophysiological processes of all  
16 these outcome diseases, the confounding factors may be different from each other.  
17 Secondly, according to a recent study performed in Korean population, RFM tend to  
18 overestimated the body fat percentage in their study population, and showed a better  
19 linear relationship with body fat percentage than BMI in men only. In ROC analysis,  
20 they found RFM was not superior to that of BMI in discriminating obese individuals<sup>32</sup>.  
21 As RFM was developed from Mexican-Americans, European-Americans, and African-  
22 Americans, and Asian populations tend to have higher body fat percentage than  
23 Caucasians at the same BMI level<sup>33</sup>. The efficiency of the RFM algorithm for  
24 estimating body fat percentage in Chinese population is unknown and needs further  
25 validation study.

26  
27 RFM and WHtR had the same AUC value in the ROC analysis. The optimal cut-off of  
28 WHtR in our study were 0.51 for male and 0.50 for female, similar to the  
29 recommendations suggested by various studies to define central obesity (WHtR > 0.5),  
30 meanwhile, 0.5 had been demonstrated to be a good boundary value for men and women  
31 across ethnic groups in assessing diabetes and CVD risk<sup>34-36</sup>. When the WHtR value  
32 was 0.5, the corresponding value for RFM were 24 for men and 36 for women, very  
33 close to the optimal cut-off of RFM in our study. Based on these, we can conclude that  
34 a high level of consistency existed between the current RFM equation and WHtR, and  
35 RFM can be an alternative to WHtR in predicting incident hypertension.

36  
37 Overall, in our study, the ROC analysis of the single index in predicting incident  
38  
39  
40  
41  
42  
43  
44  
45  
46  
47  
48  
49  
50  
51  
52  
53  
54  
55  
56  
57  
58  
59  
60



1  
2  
3 hypertension revealed that WC or WHtR did not show significant superiority over BMI.  
4  
5 Meanwhile the AUCs calculated for the regression models in table 6 further  
6  
7 demonstrated this. Indeed, as BMI does not distinguish fat mass from lean mass and  
8  
9 does not reflect fat distribution<sup>37 38</sup>, WC and index based on WC may give a better  
10  
11 quantity of visceral fat. However, same as our study, some studies reported that no  
12  
13 difference between BMI and WC/WHtR with regard to discriminating or predicting  
14  
15 hypertension<sup>39-43</sup>, and some reported BMI showed a better performance<sup>44 45</sup>, which  
16  
17 should be explained. Aside from the different methodology (such as ROC analysis, Cox  
18  
19 regression, Logistic regression) used to judge the performance, study design (cross-  
20  
21 sectional, longitudinal) and covariates taken into consideration, we think two additional  
22  
23 factors may explain the inconsistency between studies. Firstly, the morphological  
24  
25 characteristics of the study participants, in many circumstances especially in Asian  
26  
27 populations, BMI and WC are highly correlated, there were reported studies reveal their  
28  
29 ability were comparable in predicting abdominal adipose tissues which were measured  
30  
31 by CT scan<sup>46</sup>, the high collinearity between BMI and WC-based indices may result in  
32  
33 similar predictive power. Second, the inclusion criteria of the study, some studies were  
34  
35 conducted in the overall population and did not excluded those with organ dysfunction  
36  
37 such as myocardial infarction, heart failure, chronic kidney diseases. These diseases  
38  
39 may lead to changes in hemodynamic load and total fluid volume which mediates the  
40  
41 presence of hypertension, while BMI are sensitive to these changes and thus can provide  
42  
43 information more than adiposity.

44  
45 Our study has several strengths. First, our study was performed using nationally  
46  
47 representative samples of the Chinese adult population, which were recruited from 9  
48  
49 different provinces in China. Second, to our best knowledge, we were the first  
50  
51 longitudinal study to investigate whether the current RFM algorithm can be applied in  
52  
53 hypertension prediction in Chinese population and compare it predicting power with  
54  
55 traditional obesity-related indices. Third, in baseline population, we excluded the  
56  
57 individuals with history of myocardial infarction or stroke, as well as those with chronic  
58  
59 kidney disease or liver dysfunction, which may affect the association between obesity  
60  
and hypertension. This ensure the objectivity and accuracy of our research.

There are also limitations of our study. First, we exclude 717 individuals from this study  
duo to lack of data about the factors we needed in statistical analysis, which may cause  
selection bias. Second, medical history taking, physical examinations and biomarker

1  
2  
3 measurements were only carried out at the baseline, but these parameters may change  
4 over time. For example, lifestyle intervention and pharmacotherapy can result in weight  
5 loss and ameliorate metabolic disorders in some high-risk individuals and reduce the  
6 risk of developing hypertension. However, we failed to take these factors into  
7 consideration in our study. Third, although the blood pressure was measured in  
8 duplicate, white-coat hypertension may exist and affected our judgment of the outcome.  
9 Fourth, as the nature of observational study, when investigate about the association  
10 between RFM and incident hypertension, it's possible that some unknown or  
11 unmeasured factors confounded the association; however, in our logistic analysis, we  
12 had adjusted the main confounding factors, we don't think residual confounding will  
13 materially alter our conclusion. Fifth, as the participants in our study did not underwent  
14 dual-energy X-ray absorptiometry test or other tests which can give an assessment about  
15 body component, we couldn't evaluate the performance and accuracy of the RFM  
16 algorithm in Chinese population, this hinder the further interpretation of our results.  
17  
18  
19  
20  
21  
22  
23  
24  
25  
26  
27  
28

## 29 **Conclusion**

30  
31 In conclusion, our study revealed that RFM is a powerful indicator to predict incident  
32 hypertension in Chinese population, the optimal cut-off of RFM was 24.67 and 35.73  
33 for men and women respectively, individuals above the cut-off level show higher risk  
34 for hypertension and deserves early intervention to prevent it. However, based on the  
35 AUC values in ROC analysis, RFM did not show better performance compared to  
36 traditional obesity indices.  
37  
38  
39  
40  
41  
42  
43

## 44 **Acknowledgments**

45 This research used data from the China Health and Nutrition Survey (CHNS) website.  
46 We show grateful thanks to National Institute of Nutrition and Food Safety, China  
47 Center for Disease Control and Prevention, Carolina Population Center, the University  
48 of North Carolina at Chapel Hill, the NIH and the Fogarty International Center, we also  
49 thanks to the teams from China-Japan Friendship Hospital, Ministry of Health, Chinese  
50 National Human Genome Center, and Beijing Municipal Center for Disease Prevention  
51 and Control, as they launched or supported the CHNS survey and provided the data we  
52 used in this study.  
53  
54  
55  
56  
57  
58  
59  
60

## Footnotes

**Contributors:** PY and XFY contributed to the study conception and study design. PY, TH, SLH contributed to the data analysis, interpretation of the data. PY contributed to drafting the manuscript. All authors read and approved the final manuscript.

**Funding:** This research was funded by grants from the National Natural Science Foundation of China (81570740) and National Key R&D Program of China (2016YFC0901203).

**Competing interests:** The authors declare that they have no competing interests.

**Patient consent for publication:** Not required.

**Ethics approval:** The survey was approved by the Institutional Review Committees of the University of North Carolina at Chapel Hill, the National Institute of Nutrition and Food Safety and Chinese Center for Disease Control and Prevention. All participants had signed the informed consent forms during the CHNS survey.

**Provenance and peer review:** Not commissioned; externally peer reviewed.

**Data availability statement:** All datasets generated for this study are included in the article.

## References

1. Collaborators GBDRF. Global, regional, and national comparative risk assessment of 84 behavioural, environmental and occupational, and metabolic risks or clusters of risks for 195 countries and territories, 1990-2017: a systematic analysis for the Global Burden of Disease Study 2017. *Lancet* 2018;392(10159):1923-94. doi: 10.1016/S0140-6736(18)32225-6 [published Online First: 2018/11/08]
2. Chow CK, Teo KK, Rangarajan S, et al. Prevalence, awareness, treatment, and control of hypertension in rural and urban communities in high-, middle-, and low-income countries. *JAMA* 2013;310(9):959-68. doi: 10.1001/jama.2013.184182
3. Wang Z, Chen Z, Zhang L, et al. Status of Hypertension in China: Results From the

- 1  
2  
3 China Hypertension Survey, 2012-2015. *Circulation* 2018;137(22):2344-56.  
4 doi: 10.1161/CIRCULATIONAHA.117.032380 [published Online First:  
5 2018/02/15]  
6  
7 4. Lavie CJ, De Schutter A, Parto P, et al. Obesity and Prevalence of Cardiovascular  
8 Diseases and Prognosis-The Obesity Paradox Updated. *Prog Cardiovasc Dis*  
9 2016;58(5):537-47. doi: 10.1016/j.pcad.2016.01.008 [published Online First:  
10 2016/01/28]  
11  
12 5. Wilson PWF, D'Agostino RB, Sullivan L, et al. Overweight and obesity as  
13 determinants of cardiovascular risk: the Framingham experience. *Arch Intern*  
14 *Med* 2002;162(16):1867-72. doi: 10.1001/archinte.162.16.1867  
15  
16 6. Stevens VJ, Obarzanek E, Cook NR, et al. Long-term weight loss and changes in  
17 blood pressure: results of the Trials of Hypertension Prevention, phase II.  
18 *Annals of internal medicine* 2001;134(1):1-11. doi: 10.7326/0003-4819-134-1-  
19 200101020-00007  
20  
21 7. Ma C, Avenell A, Bolland M, et al. Effects of weight loss interventions for adults  
22 who are obese on mortality, cardiovascular disease, and cancer: systematic  
23 review and meta-analysis. *BMJ* 2017;359:j4849-j49. doi: 10.1136/bmj.j4849  
24  
25 8. Hayashi T, Boyko EJ, Leonetti DL, et al. Visceral adiposity is an independent  
26 predictor of incident hypertension in Japanese Americans. *Annals of internal*  
27 *medicine* 2004;140(12):992-1000. doi: 10.7326/0003-4819-140-12-  
28 200406150-00008  
29  
30 9. Hayashi T, Boyko EJ, McNeely MJ, et al. Visceral adiposity, not abdominal  
31 subcutaneous fat area, is associated with an increase in future insulin resistance  
32 in Japanese Americans. *Diabetes* 2008;57(5):1269-75. doi: 10.2337/db07-1378  
33 [published Online First: 2008/02/25]  
34  
35 10. Sullivan CA, Kahn SE, Fujimoto WY, et al. Change in Intra-Abdominal Fat Predicts  
36 the Risk of Hypertension in Japanese Americans. *Hypertension* 2015;66(1):134-  
37 40. doi: 10.1161/HYPERTENSIONAHA.114.04990 [published Online First:  
38 2015/05/11]  
39  
40 11. Karlsson T, Rask-Andersen M, Pan G, et al. Contribution of genetics to visceral  
41 adiposity and its relation to cardiovascular and metabolic disease. *Nat Med*  
42 2019;25(9):1390-95. doi: 10.1038/s41591-019-0563-7 [published Online First:  
43 2019/09/09]  
44  
45 12. Physical status: the use and interpretation of anthropometry. Report of a WHO  
46 Expert Committee. *World Health Organization technical report series*  
47 1995;854:1-452. [published Online First: 1995/01/01]  
48  
49 13. Cai L, Liu A, Zhang Y, et al. Waist-to-height ratio and cardiovascular risk factors  
50 among Chinese adults in Beijing. *PloS one* 2013;8(7):e69298. doi:  
51 10.1371/journal.pone.0069298 [published Online First: 2013/07/23]  
52  
53 14. Dong J, Ni YQ, Chu X, et al. Association between the abdominal obesity  
54 anthropometric indicators and metabolic disorders in a Chinese population.  
55 *Public health* 2016;131:3-10. doi: 10.1016/j.puhe.2015.08.001 [published  
56 Online First: 2015/11/19]  
57  
58 15. Savva SC, Lamnisis D, Kafatos AG. Predicting cardiometabolic risk: waist-to-  
59 height ratio or BMI. A meta-analysis. *Diabetes Metab Syndr Obes* 2013;6:403-  
60 19. doi: 10.2147/dms0.S34220 [published Online First: 2013/11/02]  
16. Deng G, Yin L, Liu W, et al. Associations of anthropometric adiposity indexes with  
hypertension risk: A systematic review and meta-analysis including PURE-  
China. *Medicine* 2018;97(48):e13262. doi: 10.1097/md.00000000000013262

- [published Online First: 2018/12/05]
17. Chen X, Liu Y, Sun X, et al. Comparison of body mass index, waist circumference, conicity index, and waist-to-height ratio for predicting incidence of hypertension: the rural Chinese cohort study. *Journal of human hypertension* 2018;32(3):228-35. doi: 10.1038/s41371-018-0033-6 [published Online First: 2018/02/09]
  18. Song J, Zhao Y, Nie S, et al. The effect of lipid accumulation product and its interaction with other factors on hypertension risk in Chinese Han population: A cross-sectional study. *PloS one* 2018;13(6):e0198105. doi: 10.1371/journal.pone.0198105 [published Online First: 2018/06/07]
  19. Hu L, Hu G, Huang X, et al. Different adiposity indices and their associations with hypertension among Chinese population from Jiangxi province. *BMC cardiovascular disorders* 2020;20(1):115. doi: 10.1186/s12872-020-01388-2 [published Online First: 2020/03/07]
  20. Tong Y, Han E. Associations between body shape, body adiposity and other indices: a case study of hypertension in Chinese children and adolescents. *Annals of human biology* 2019;46(6):460-66. doi: 10.1080/03014460.2019.1688864 [published Online First: 2019/11/27]
  21. Woolcott OO, Bergman RN. Relative fat mass (RFM) as a new estimator of whole-body fat percentage — A cross-sectional study in American adult individuals. *Sci Rep* 2018;8(1):10980. doi: 10.1038/s41598-018-29362-1 [published Online First: 2018/07/22]
  22. Popkin BM, Du S, Zhai F, et al. Cohort Profile: The China Health and Nutrition Survey--monitoring and understanding socio-economic and health change in China, 1989-2011. *International journal of epidemiology* 2010;39(6):1435-40. doi: 10.1093/ije/dyp322 [published Online First: 2009/11/06]
  23. Wang Z, Chen Z, Zhang L, et al. Status of Hypertension in China: Results From the China Hypertension Survey, 2012-2015. *Circulation* 2018;137(22):2344-56. doi: 10.1161/circulationaha.117.032380 [published Online First: 2018/02/17]
  24. Woolcott OO, Bergman RN. Relative fat mass (RFM) as a new estimator of whole-body fat percentage — A cross-sectional study in American adult individuals. *Sci Rep* 2018;8(1):10980-80. doi: 10.1038/s41598-018-29362-1
  25. Levey AS, Stevens LA, Schmid CH, et al. A new equation to estimate glomerular filtration rate. *Annals of internal medicine* 2009;150(9):604-12. doi: 10.7326/0003-4819-150-9-200905050-00006 [published Online First: 2009/05/06]
  26. DeLong ER, DeLong DM, Clarke-Pearson DL. Comparing the areas under two or more correlated receiver operating characteristic curves: a nonparametric approach. *Biometrics* 1988;44(3):837-45.
  27. Chandra A, Neeland IJ, Berry JD, et al. The relationship of body mass and fat distribution with incident hypertension: observations from the Dallas Heart Study. *J Am Coll Cardiol* 2014;64(10):997-1002. doi: 10.1016/j.jacc.2014.05.057
  28. DeMarco VG, Aroor AR, Sowers JR. The pathophysiology of hypertension in patients with obesity. *Nat Rev Endocrinol* 2014;10(6):364-76. doi: 10.1038/nrendo.2014.44 [published Online First: 2014/04/15]
  29. Hall JE, do Carmo JM, da Silva AA, et al. Obesity-induced hypertension: interaction of neurohumoral and renal mechanisms. *Circ Res* 2015;116(6):991-1006. doi: 10.1161/CIRCRESAHA.116.305697

- 1  
2  
3  
4  
5  
6  
7  
8  
9  
10  
11  
12  
13  
14  
15  
16  
17  
18  
19  
20  
21  
22  
23  
24  
25  
26  
27  
28  
29  
30  
31  
32  
33  
34  
35  
36  
37  
38  
39  
40  
41  
42  
43  
44  
45  
46  
47  
48  
49  
50  
51  
52  
53  
54  
55  
56  
57  
58  
59  
60
30. Guzmán-León AE, Velarde AG, Vidal-Salas M, et al. External validation of the relative fat mass (RFM) index in adults from north-west Mexico using different reference methods. *PloS one* 2019;14(12):e0226767-e67. doi: 10.1371/journal.pone.0226767
  31. Machado MV, Policarpo S, Coutinho J, et al. What Is the Role of the New Index Relative Fat Mass (RFM) in the Assessment of Nonalcoholic Fatty Liver Disease (NAFLD)? *Obes Surg* 2020;30(2):560-68. doi: 10.1007/s11695-019-04213-8
  32. Paek JK, Kim J, Kim K, et al. Usefulness of relative fat mass in estimating body adiposity in Korean adult population. *Endocr J* 2019;66(8):723-29. doi: 10.1507/endocrj.EJ19-0064 [published Online First: 2019/05/28]
  33. Deurenberg P, Deurenberg-Yap M, Guricci S. Asians are different from Caucasians and from each other in their body mass index/body fat per cent relationship. *Obes Rev* 2002;3(3):141-46. doi: 10.1046/j.1467-789x.2002.00065.x
  34. Zeng Q, He Y, Dong S, et al. Optimal cut-off values of BMI, waist circumference and waist:height ratio for defining obesity in Chinese adults. *Br J Nutr* 2014;112(10):1735-44. doi: 10.1017/S0007114514002657 [published Online First: 2014/10/10]
  35. Ashwell M, Gibson S. Waist to height ratio is a simple and effective obesity screening tool for cardiovascular risk factors: Analysis of data from the British National Diet And Nutrition Survey of adults aged 19-64 years. *Obes Facts* 2009;2(2):97-103. doi: 10.1159/000203363 [published Online First: 2009/03/31]
  36. Browning LM, Hsieh SD, Ashwell M. A systematic review of waist-to-height ratio as a screening tool for the prediction of cardiovascular disease and diabetes: 0.5 could be a suitable global boundary value. *Nutr Res Rev* 2010;23(2):247-69. doi: 10.1017/S0954422410000144 [published Online First: 2010/09/07]
  37. Nevill AM, Stewart AD, Olds T, et al. Relationship between adiposity and body size reveals limitations of BMI. *Am J Phys Anthropol* 2006;129(1):151-56. doi: 10.1002/ajpa.20262
  38. Gómez-Ambrosi J, Silva C, Galofré JC, et al. Body mass index classification misses subjects with increased cardiometabolic risk factors related to elevated adiposity. *Int J Obes (Lond)* 2012;36(2):286-94. doi: 10.1038/ijo.2011.100 [published Online First: 2011/05/17]
  39. Nyamdorj R, Qiao Q, Lam TH, et al. BMI compared with central obesity indicators in relation to diabetes and hypertension in Asians. *Obesity (Silver Spring)* 2008;16(7):1622-35. doi: 10.1038/oby.2008.73 [published Online First: 2008/04/19]
  40. de Oliveira CM, Ulbrich AZ, Neves FS, et al. Association between anthropometric indicators of adiposity and hypertension in a Brazilian population: Baependi Heart Study. *PloS one* 2017;12(10):e0185225. doi: 10.1371/journal.pone.0185225 [published Online First: 2017/10/13]
  41. Grootveld LR, Van Valkengoed IG, Peters RJ, et al. The role of body weight, fat distribution and weight change in ethnic differences in the 9-year incidence of hypertension. *Journal of hypertension* 2014;32(5):990-6; discussion 96-7. doi: 10.1097/hjh.000000000000135 [published Online First: 2014/02/27]
  42. Nyamdorj R, Qiao Q, Söderberg S, et al. Comparison of body mass index with waist circumference, waist-to-hip ratio, and waist-to-stature ratio as a predictor of hypertension incidence in Mauritius. *Journal of hypertension* 2008;26(5):866-70. doi: 10.1097/HJH.0b013e3282f624b7 [published Online First: 2008/04/10]

- 1  
2  
3  
4  
5  
6  
7  
8  
9  
10  
11  
12  
13  
14  
15  
16  
17  
18  
19  
20  
21  
22  
23  
24  
25  
26  
27  
28  
29  
30  
31  
32  
33  
34  
35  
36  
37  
38  
39  
40  
41  
42  
43  
44  
45  
46  
47  
48  
49  
50  
51  
52  
53  
54  
55  
56  
57  
58  
59  
60
43. Rezende AC, Souza LG, Jardim TV, et al. Is waist-to-height ratio the best predictive indicator of hypertension incidence? A cohort study. *BMC public health* 2018;18(1):281. doi: 10.1186/s12889-018-5177-3 [published Online First: 2018/02/27]
44. Li Y, Liu Y, He J, et al. The association of wrist circumference with hypertension in northeastern Chinese residents in comparison with other anthropometric obesity indices. *PeerJ* 2019;7:e7599. doi: 10.7717/peerj.7599 [published Online First: 2019/09/17]
45. Lam BC, Koh GC, Chen C, et al. Comparison of Body Mass Index (BMI), Body Adiposity Index (BAI), Waist Circumference (WC), Waist-To-Hip Ratio (WHR) and Waist-To-Height Ratio (WHtR) as predictors of cardiovascular disease risk factors in an adult population in Singapore. *PloS one* 2015;10(4):e0122985. doi: 10.1371/journal.pone.0122985 [published Online First: 2015/04/17]
46. Oka R, Miura K, Sakurai M, et al. Comparison of waist circumference with body mass index for predicting abdominal adipose tissue. *Diabetes Res Clin Pract* 2009;83(1):100-05. doi: 10.1016/j.diabres.2008.10.001 [published Online First: 2008/11/18]

**Table 1** Baseline characteristics of participants according to follow-up outcomes

|                                    | Incident hypertension |                    | p value |
|------------------------------------|-----------------------|--------------------|---------|
|                                    | no (n=2572)           | yes (n=834)        |         |
| Age                                | 45.0(37.0-54.0)       | 52.0(44.0-59.0)    | < 0.001 |
| Men/Women                          | 1144/1428             | 413/421            | 0.012   |
| Alcohol consumer (%)               | 32.9                  | 38.8               | 0.002   |
| Smoking                            |                       |                    | 0.303   |
| Current smoker (%)                 | 28.7                  | 30.6               |         |
| Ex smoker (%)                      | 2.0                   | 2.6                |         |
| Non-smoker (%)                     | 69.3                  | 66.8               |         |
| Body weight (Kg)                   | 57.7(52.0-65.2)       | 61.0(54.3-68.9)    | < 0.001 |
| BMI (kg/m <sup>2</sup> )           | 22.37(20.50-24.58)    | 23.80(21.51-26.07) | < 0.001 |
| WC (cm)                            | 80.0(73.0-86.7)       | 84.0(77.9-90.0)    | < 0.001 |
| WHtR                               | 0.50(0.46-0.54)       | 0.52(0.48-0.56)    | < 0.001 |
| RFM                                | 30.18(23.75-36.70)    | 30.83(24.69-38.62) | < 0.001 |
| SBP (mmHg)                         | 116.0(108.0-121.3)    | 120.7(114.9-128.7) | < 0.001 |
| DBP (mmHg)                         | 76.7(70.0-80.0)       | 80.0(75.3-82.0)    | < 0.001 |
| eGFR (mL/min/1.73 m <sup>2</sup> ) | 83.2(74.7-93.2)       | 80.4(72.1-89.7)    | < 0.001 |
| Cr (μmol/L)                        | 82.0(74.0-93.0)       | 83.0(75.0-93.0)    | 0.394   |
| Uric acid (μmol/L)                 | 276.0(225.0-338.8)    | 290.0(234.0-353.0) | 0.001   |
| ALT (U/L)                          | 18.0(13.0-25.0)       | 19.0(14.0-28.0)    | < 0.001 |
| FPG (mmol/L)                       | 5.00(4.63-5.45)       | 5.15(4.76-5.64)    | < 0.001 |
| TG (mmol/L)                        | 1.13(0.78-1.73)       | 1.31(0.90-1.92)    | < 0.001 |



|                |                 |                 |         |
|----------------|-----------------|-----------------|---------|
| TC (mmol/L)    | 4.63(4.05-5.27) | 4.87(4.23-5.51) | < 0.001 |
| HDL-C (mmol/L) | 1.40(1.18-1.64) | 1.40(1.16-1.64) | 0.804   |
| LDL-C (mmol/L) | 2.78(2.26-3.38) | 2.98(2.42-3.57) | < 0.001 |

Categorical variables were presented as a number (percentage), continuous variables with a skewed distribution were presented as medians (IQR). P values are for Mann-Whitney U test for or  $\chi^2$ -test.

BMI, body mass index; WC, waist circumference; WHtR, waist-to-height ratio; RFM, relative fat mass; SBP, systolic blood pressure; DBP, diastolic blood pressure, eGFR, estimate glomerular filtration rate; Cr, creatinine; ALT, alamine aminotransferase; FPG, fasting plasma glucose; TG, triglyceride; TC, total cholesterol; HDL-C, high-density lipoprotein cholesterol; LDL-C, low-density lipoprotein cholesterol.

**Table 2** Baseline characteristics of participants according to RFM

|                                    | Quartile 1<br>n=853 | Quartile 2<br>n=851 | Quartile 3<br>n=853 | Quartile 4<br>n=849 | p value |
|------------------------------------|---------------------|---------------------|---------------------|---------------------|---------|
| Age                                | 41.0(32.0-50.0)     | 45.0(38.0-54.0)     | 49.0(41.0-57.0)     | 51.0(42.0-58.0)     | < 0.001 |
| Men/Women                          | 387/463             | 387/456             | 386/462             | 384/457             | 0.999   |
| Alcohol consumer (%)               | 30.5                | 34.9                | 35.9                | 36.3                | 0.045   |
| Current smoker (%)                 | 29.5                | 29.3                | 29.1                | 28.9                | 0.301   |
| Body weight (Kg)                   | 52.5(47.8-57.6)     | 57.0 (51.7 -63.1)   | 60.6(55.0-67.3)     | 66.4(59.1-74.4)     | < 0.001 |
| BMI (kg/m <sup>2</sup> )           | 19.96 (18.71-21.21) | 21.99 (20.84-23.25) | 23.63(22.09-24.92)  | 26.13(24.12-27.75)  | < 0.001 |
| WC (cm)                            | 70.0(67.0-73.0)     | 78.0(75.0-80.0)     | 84.0(81.0-87.0)     | 92.0(88.5-96.5)     | < 0.001 |
| WHtR                               | 0.44(0.42-0.45)     | 0.48(0.47-0.49)     | 0.52(0.51-0.53)     | 0.57(0.56-0.60)     | < 0.001 |
| SBP (mmHg)                         | 110.7(102.8 -120.0) | 117.3(110.0-122.0)  | 120.0(110.0-125.3)  | 120.0(112.0-126.7)  | < 0.001 |
| DBP (mmHg)                         | 73.3(69.3-80.0)     | 77.3(70.0-80.7)     | 79.3(71.3-81.0)     | 80.0(73.3-82.0)     | < 0.001 |
| eGFR (mL/min/1.73 m <sup>2</sup> ) | 86.5(76.5 -96.2)    | 81.9 (74.5-92.4)    | 81.4 (73.3 -90.6)   | 80.7 (72.2 -89.7)   | < 0.001 |
| Cr (µmol/L)                        | 83.0(74.5-93.0)     | 83.0(75.0-93.0)     | 82.0(75.0-93.0)     | 83.0(74.0-93.0)     | 0.914   |
| Uric acid (µmol/L)                 | 265.0(219.0-324.0)  | 275.0(222.0-333.0)  | 279.0(230.0-338.0)  | 303.0(244.5 -372.0) | < 0.001 |
| ALT (U/L)                          | 15.0(11.0-22.0)     | 17.0(12.0-24.0)     | 19.0(14.0-26.0)     | 22.0(16.0-32.0)     | < 0.001 |
| FPG (mmol/L)                       | 4.89(4.53-5.27)     | 4.95(4.62-5.38)     | 5.07(4.67-5.53)     | 5.22(4.84-5.76)     | < 0.001 |
| TG (mmol/L)                        | 0.94(0.68-1.28)     | 1.11(0.77-1.65)     | 1.25(0.85-1.92)     | 1.49(1.03-2.46)     | < 0.001 |

|                   |                 |                 |                 |                 |          |
|-------------------|-----------------|-----------------|-----------------|-----------------|----------|
| TC (mmol/L)       | 4.40(3.85-4.96) | 4.64(4.10-5.34) | 4.79(4.17-5.40) | 4.91(4.30-5.57) | < 0.001  |
| HDL-C (mmol/L)    | 1.47(1.28-1.72) | 1.45(1.22-1.69) | 1.39(1.15-1.61) | 1.28(1.09-1.50) | < 0.001  |
| LDL-C (mmol/L)    | 2.58(2.11-3.14) | 2.83(2.29-3.43) | 2.91(2.39-3.50) | 3.00(2.47-3.61) | < 0.001  |
| Hyperuricemia (%) | 5.3             | 9.8             | 12.0            | 17.2            | < 0.001* |
| Dyslipidemia (%)  | 32.5            | 49.2            | 57.6            | 69.4            | < 0.001* |
| Diabetes (%)      | 2.8             | 5.1             | 6.8             | 13.0            | < 0.001* |

Categorical variables were presented as a number (percentage), continuous variables with a skewed distribution were presented as medians (IQR). p values are for Kruskal-Wallis test or  $\chi^2$ -test. \*p values for linear trend across quartiles (linear tendency  $\chi^2$ -test).

BMI, body mass index; WC, waist circumference; WHtR, waist-to-height ratio; RFM, relative fat mass; SBP, systolic blood pressure; DBP, diastolic blood pressure, eGFR, estimate glomerular filtration rate; Cr, creatinine; ALT, alamine aminotransferase; FPG, fasting plasma glucose; TG, triglyceride; TC, total cholesterol; HDL-C, high-density lipoprotein cholesterol; LDL-C, low-density lipoprotein cholesterol.

1  
2  
3  
4  
5  
6  
7  
8  
9  
10  
11  
12  
13  
14  
15  
16  
17  
18  
19  
20  
21  
22  
23  
24  
25  
26  
27  
28  
29  
30  
31  
32  
33  
34  
35  
36  
37  
38  
39  
40  
41  
42  
43  
44  
45  
46

For peer review only

**Table 3** Odds ratios (ORs) and 95% confidence intervals (CI) for incident hypertension according to baseline quartiles of RFM

|                       | Quartile 1<br>(n=853) | Quartile 2<br>(n=851) | Quartile 3<br>(n=853) | Quartile 4<br>(n=849) | p for trend |
|-----------------------|-----------------------|-----------------------|-----------------------|-----------------------|-------------|
| Incident hypertension | 126                   | 180                   | 229                   | 299                   | < 0.001     |
| Unadjusted            | 1                     | 1.548 (1.205-1.989)   | 2.117(1.662-2.698)    | 3.137(2.478-3.971)    | < 0.001     |
| Model 1               | 1                     | 1.337 (1.035-1.728)   | 1.662(1.295-2.133)    | 2.360(1.849-3.013)    | < 0.001     |
| Model 2               | 1                     | 1.320(1.021-1.707)    | 1.633(1.272-2.098)    | 2.321(1.817-2.966)    | < 0.001     |
| Model 3               | 1                     | 1.266(0.977-1.640)    | 1.513(1.172-1.953)    | 2.032(1.567-2.634)    | < 0.001     |

Quartiles of RFM for males: 1st Quartile≤20.0, 2nd Quartile = 20.1–23.4, 3rd Quartile =23.5–26.3, 4th quartile≥26.4

Quartiles of RFM for females: 1st Quartile≤33.1, 2nd Quartile= 33.2–36.7, 3rd Quartile = 36.8–39.8, 4th Quartile≥39.9

Model 1: adjusted for age, sex

Model 2: adjusted for age, sex, smoking, alcohol drinking

Model 3: adjusted for age, sex, smoking, alcohol drinking, uric acid, eGFR, ALT, TG, TC, HDL-C, LDL-C, FPG

eGFR, estimate glomerular filtration rate; ALT, alamine aminotransferase; TG, triglyceride; TC, total cholesterol; HDL-C, high-density lipoprotein cholesterol; LDL-C, low-density lipoprotein cholesterol; FPG, fasting plasma glucose.

**Table 4** AUCs for each anthropometric index in predicting hypertension

|      | Men                 |         | Women              |         |
|------|---------------------|---------|--------------------|---------|
|      | AUC(95%CI)          | p value | AUC(95%CI)         | p value |
| RFM  | 0.597 (0.572-0.621) | < 0.001 | 0.647(0.625-0.669) | < 0.001 |
| BMI  | 0.593 (0.568-0.618) | < 0.001 | 0.615(0.592-0.637) | < 0.001 |
| WC   | 0.583 (0.558-0.608) | < 0.001 | 0.644(0.622-0.666) | < 0.001 |
| WHtR | 0.597 (0.572-0.621) | < 0.001 | 0.647(0.625-0.669) | < 0.001 |

AUC, area under the curve; BMI, body mass index; WC, waist circumference; WHtR, waist-to-height ratio; RFM, relative fat mass

1  
2  
3  
4  
5  
6  
7  
8  
9  
10  
11  
12  
13  
14  
15  
16  
17  
18  
19  
20  
21  
22  
23  
24  
25  
26  
27  
28  
29  
30  
31  
32  
33  
34  
35  
36  
37  
38  
39  
40  
41  
42  
43  
44  
45  
46

**Table 5** Optimal cutoff points for each anthropometric index in predicting hypertension

|      | Men     |                 |                 |              | Women   |                 |                 |              |
|------|---------|-----------------|-----------------|--------------|---------|-----------------|-----------------|--------------|
|      | Cut off | Sensitivity (%) | Specificity (%) | Youden index | Cut off | Sensitivity (%) | Specificity (%) | Youden index |
| RFM  | 24.67   | 0.51            | 0.65            | 0.16         | 35.73   | 0.75            | 0.47            | 0.22         |
| BMI  | 23.74   | 0.48            | 0.67            | 0.15         | 23.83   | 0.53            | 0.67            | 0.20         |
| WC   | 82.95   | 0.58            | 0.56            | 0.14         | 77.15   | 0.76            | 0.46            | 0.22         |
| WHtR | 0.51    | 0.51            | 0.65            | 0.16         | 0.50    | 0.75            | 0.47            | 0.22         |

AUC, area under the curve; BMI, body mass index; WC, waist circumference; WHtR, waist-to-height ratio; RFM, relative fat mass

**Table 6** Performance of different models in predicting incident hypertension

|                    | Men                |         | Women               |         |
|--------------------|--------------------|---------|---------------------|---------|
|                    | AUC(95%CI)         | p value | AUC(95%CI)          | p value |
| RFM+other factors  | 0.660(0.636-0.684) | < 0.001 | 0.697 (0.676-0.718) | < 0.001 |
| BMI+other factors  | 0.667(0.643-0.690) | < 0.001 | 0.702(0.680-0.723)  | < 0.001 |
| WC+other factors   | 0.660(0.636-0.684) | < 0.001 | 0.704(0.683-0.725)  | < 0.001 |
| WHtR+other factors | 0.661(0.637-0.685) | < 0.001 | 0.698(0.677-0.719)  | < 0.001 |

Other factors including age, smoking, alcohol drinking, uric acid, eGFR, ALT, TG, TC, HDL-C, LDL-C, FPG.

AUC, area under the curve; BMI, body mass index; WC, waist circumference; WHtR, waist-to-height ratio; RFM, relative fat mass

1  
2  
3  
4  
5  
6 **figure legends**  
7

8 Figure 1 The flow chart of sample selection from the China Health and Nutrition Survey

9 Figure 2 Receive-operating characteristic curves (ROC) of BMI, WC, WHtR, and RFM for incident hypertension  
10  
11  
12  
13  
14  
15  
16  
17  
18  
19  
20  
21  
22  
23  
24  
25  
26  
27  
28  
29  
30  
31  
32  
33  
34  
35  
36  
37  
38  
39  
40  
41  
42  
43  
44  
45  
46

For peer review only

1  
2  
3  
4  
5  
6  
7  
8  
9  
10  
11  
12  
13  
14  
15  
16  
17  
18  
19  
20  
21  
22  
23  
24  
25  
26  
27  
28  
29  
30  
31  
32  
33  
34  
35  
36  
37  
38  
39  
40  
41  
42  
43  
44  
45  
46  
47  
48  
49  
50  
51  
52  
53  
54  
55  
56  
57  
58  
59  
60

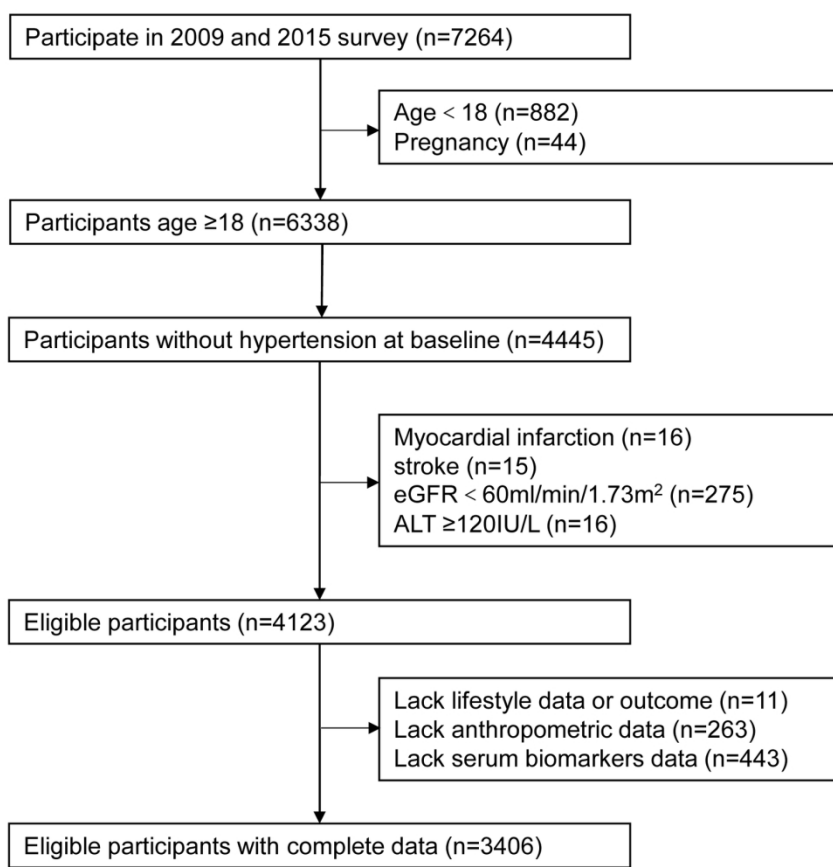

80x78mm (600 x 600 DPI)



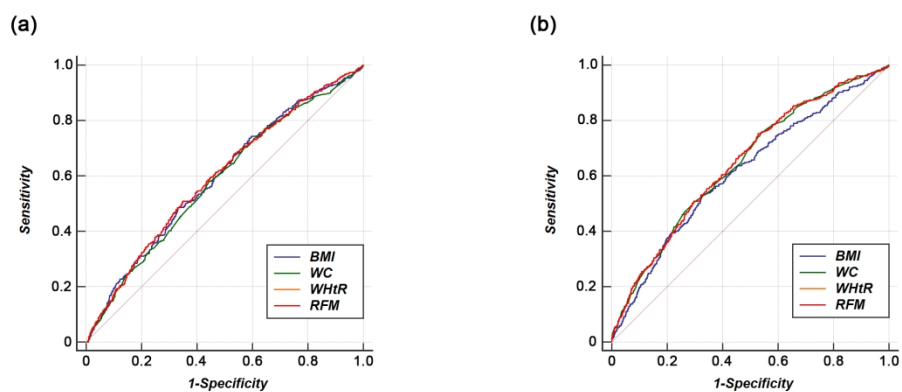

Figure 2 Receive-operating characteristic curves (ROC) of BMI, WC, WHtR, and RFM for incident hypertension

170x75mm (358 x 358 DPI)

**STROBE 2007 (v4) checklist of items to be included in reports of observational studies in epidemiology\***  
**Checklist for cohort, case-control, and cross-sectional studies (combined)**

| Section/Topic             | Item # | Recommendation                                                                                                                                                                                                                                                                                                                                                                                                                                                         | Reported on page # |
|---------------------------|--------|------------------------------------------------------------------------------------------------------------------------------------------------------------------------------------------------------------------------------------------------------------------------------------------------------------------------------------------------------------------------------------------------------------------------------------------------------------------------|--------------------|
| Title and abstract        | 1      | (a) Indicate the study's design with a commonly used term in the title or the abstract                                                                                                                                                                                                                                                                                                                                                                                 | 1                  |
|                           |        | (b) Provide in the abstract an informative and balanced summary of what was done and what was found                                                                                                                                                                                                                                                                                                                                                                    | 2                  |
| <b>Introduction</b>       |        |                                                                                                                                                                                                                                                                                                                                                                                                                                                                        |                    |
| Background/rationale      | 2      | Explain the scientific background and rationale for the investigation being reported                                                                                                                                                                                                                                                                                                                                                                                   | 3,4                |
| Objectives                | 3      | State specific objectives, including any pre-specified hypotheses                                                                                                                                                                                                                                                                                                                                                                                                      | 4                  |
| <b>Methods</b>            |        |                                                                                                                                                                                                                                                                                                                                                                                                                                                                        |                    |
| Study design              | 4      | Present key elements of study design early in the paper                                                                                                                                                                                                                                                                                                                                                                                                                | 4-5                |
| Setting                   | 5      | Describe the setting, locations, and relevant dates, including periods of recruitment, exposure, follow-up, and data collection                                                                                                                                                                                                                                                                                                                                        | 4-5                |
| Participants              | 6      | (a) <i>Cohort study</i> —Give the eligibility criteria, and the sources and methods of selection of participants. Describe methods of follow-up<br><i>Case-control study</i> —Give the eligibility criteria, and the sources and methods of case ascertainment and control selection. Give the rationale for the choice of cases and controls<br><i>Cross-sectional study</i> —Give the eligibility criteria, and the sources and methods of selection of participants | 4-5                |
|                           |        | (b) <i>Cohort study</i> —For matched studies, give matching criteria and number of exposed and unexposed<br><i>Case-control study</i> —For matched studies, give matching criteria and the number of controls per case                                                                                                                                                                                                                                                 | -                  |
| Variables                 | 7      | Clearly define all outcomes, exposures, predictors, potential confounders, and effect modifiers. Give diagnostic criteria, if applicable                                                                                                                                                                                                                                                                                                                               | 6                  |
| Data sources/ measurement | 8*     | For each variable of interest, give sources of data and details of methods of assessment (measurement). Describe comparability of assessment methods if there is more than one group                                                                                                                                                                                                                                                                                   | 5                  |
| Bias                      | 9      | Describe any efforts to address potential sources of bias                                                                                                                                                                                                                                                                                                                                                                                                              | 5                  |
| Study size                | 10     | Explain how the study size was arrived at                                                                                                                                                                                                                                                                                                                                                                                                                              | 5                  |
| Quantitative variables    | 11     | Explain how quantitative variables were handled in the analyses. If applicable, describe which groupings were chosen and why                                                                                                                                                                                                                                                                                                                                           | 7                  |
| Statistical methods       | 12     | (a) Describe all statistical methods, including those used to control for confounding                                                                                                                                                                                                                                                                                                                                                                                  | 7                  |
|                           |        | (b) Describe any methods used to examine subgroups and interactions                                                                                                                                                                                                                                                                                                                                                                                                    | 7                  |
|                           |        | (c) Explain how missing data were addressed                                                                                                                                                                                                                                                                                                                                                                                                                            | 5                  |
|                           |        | (d) <i>Cohort study</i> —If applicable, explain how loss to follow-up was addressed<br><i>Case-control study</i> —If applicable, explain how matching of cases and controls was addressed                                                                                                                                                                                                                                                                              | 5                  |

|                          |     |                                                                                                                                                                                                              |       |
|--------------------------|-----|--------------------------------------------------------------------------------------------------------------------------------------------------------------------------------------------------------------|-------|
|                          |     | <i>Cross-sectional study</i> —If applicable, describe analytical methods taking account of sampling strategy                                                                                                 |       |
|                          |     | (e) Describe any sensitivity analyses                                                                                                                                                                        | -     |
| <b>Results</b>           |     |                                                                                                                                                                                                              |       |
| Participants             | 13* | (a) Report numbers of individuals at each stage of study—eg numbers potentially eligible, examined for eligibility, confirmed eligible, included in the study, completing follow-up, and analysed            | 5     |
|                          |     | (b) Give reasons for non-participation at each stage                                                                                                                                                         | 5     |
|                          |     | (c) Consider use of a flow diagram                                                                                                                                                                           | 5     |
| Descriptive data         | 14* | (a) Give characteristics of study participants (eg demographic, clinical, social) and information on exposures and potential confounders                                                                     | 7     |
|                          |     | (b) Indicate number of participants with missing data for each variable of interest                                                                                                                          | 5     |
|                          |     | (c) <i>Cohort study</i> —Summarise follow-up time (eg, average and total amount)                                                                                                                             | 5     |
| Outcome data             | 15* | <i>Cohort study</i> —Report numbers of outcome events or summary measures over time                                                                                                                          | 8     |
|                          |     | <i>Case-control study</i> —Report numbers in each exposure category, or summary measures of exposure                                                                                                         | -     |
|                          |     | <i>Cross-sectional study</i> —Report numbers of outcome events or summary measures                                                                                                                           | -     |
| Main results             | 16  | (a) Give unadjusted estimates and, if applicable, confounder-adjusted estimates and their precision (eg, 95% confidence interval). Make clear which confounders were adjusted for and why they were included | 8     |
|                          |     | (b) Report category boundaries when continuous variables were categorized                                                                                                                                    | -     |
|                          |     | (c) If relevant, consider translating estimates of relative risk into absolute risk for a meaningful time period                                                                                             | -     |
| Other analyses           | 17  | Report other analyses done—eg analyses of subgroups and interactions, and sensitivity analyses                                                                                                               | 8     |
| <b>Discussion</b>        |     |                                                                                                                                                                                                              |       |
| Key results              | 18  | Summarise key results with reference to study objectives                                                                                                                                                     | 9     |
| Limitations              | 19  | Discuss limitations of the study, taking into account sources of potential bias or imprecision. Discuss both direction and magnitude of any potential bias                                                   | 10,11 |
| Interpretation           | 20  | Give a cautious overall interpretation of results considering objectives, limitations, multiplicity of analyses, results from similar studies, and other relevant evidence                                   | 10    |
| Generalisability         | 21  | Discuss the generalisability (external validity) of the study results                                                                                                                                        | 12    |
| <b>Other information</b> |     |                                                                                                                                                                                                              |       |
| Funding                  | 22  | Give the source of funding and the role of the funders for the present study and, if applicable, for the original study on which the present article is based                                                | 13    |

\*Give information separately for cases and controls in case-control studies and, if applicable, for exposed and unexposed groups in cohort and cross-sectional studies.

**Note:** An Explanation and Elaboration article discusses each checklist item and gives methodological background and published examples of transparent reporting. The STROBE checklist is best used in conjunction with this article (freely available on the Web sites of PLoS Medicine at <http://www.plosmedicine.org/>, Annals of Internal Medicine at <http://www.annals.org/>, and Epidemiology at <http://www.epidem.com/>). Information on the STROBE Initiative is available at [www.strobe-statement.org](http://www.strobe-statement.org).
